# Supplementary material for: The Single-Nucleotide Resolution Transcriptome of Pseudomonas aeruginosa Grown in Body Temperature
Source: PLoS Pathog. 2012 Sep 27;8(9):e1002945. doi: 10.1371/journal.ppat.1002945 (PMC3460626; doi:10.1371/journal.ppat.1002945)
Supplement: Table S3 — Operon organization and definition of transcriptional units. (XLSX) [file ppat.1002945.s007.xlsx]

## Sheet: Sheet1
TU id	# of genes in TU	TSS of TU	Start of first ORF in TU	End of last ORF in TU	Strand	Genes in TU	5' UTR length (nt)	Comment	Genes products	Gene homologs in PAO1
1	2	442	483	3159	+	PA14_00010, PA14_00020	41		chromosomal replication initiation, DNA polymerase III	PA0001, PA0002
2	1	3084	3169	4278	+	PA14_00030	85		recombination protein F	PA0003
3	1	4182	4275	6695	+	PA14_00050	93		DNA gyrase subunit	PA0004
4	2	8367	7018	8339	-	PA14_00060, PA14_00070	28		putative acyltransferase, D,D-heptose 1,7-bisphosphate phosphatase	PA0005, PA0006
5	1	8453	8671	10377	+	PA14_00080	218		hypothetical protein	PA0007
6	2	13469	10434	13435	-	PA14_00090, PA14_00100	34		glycyl-tRNA synthetase subunit, glycyl-tRNA synthetase subunit	PA0008, PA0009
7	1	13436	13540	14091	+	PA14_00110	104		DNA-3-methyladenine glycosidase I	PA0010
8	1	14213	14236	15123	+	PA14_00120	23		lipid A biosynthesis	PA0011
9	1	NA	15208	15474	+	PA14_00130	NA		hypothetical protein	PA0012
10	1	NA	15621	16274	+	PA14_00140	NA		hypothetical protein	PA0013
11	1	NA	16336	16608	-	PA14_00150	NA		hypothetical protein	PA0014
12	1	17259	16923	17240	-	PA14_00160	19		TPR repeat-containing protein	PA0015
13	3	21083	17389	21034	-	PA14_00170, PA14_00180, PA14_00190	49		potassium transporter peripheral, putative tRNA and, methionyl-tRNA formyltransferase	PA0016, PA0017, PA0018
14	1	21706	21088	21594	-	PA14_00200	112		peptide deformylase	PA0019
15	1	21652	21733	22758	+	PA14_00210	81		lysin domain-containing protein	PA0020
16	1	NA	22893	23981	+	PA14_00230	NA		putative Rossmann fold	PA0021
17	1	23999	24022	24579	+	PA14_00240	23		hypothetical protein	PA0022
18	1	NA	24589	25566	-	PA14_00250	NA		quinone oxidoreductase	PA0023
19	2	25701	25757	27556	+	PA14_00280, PA14_00290	56		coproporphyrinogen III oxidase, shikimate 5-dehydrogenase	PA0024, PA0025
20	3	27643	27667	30519	+	PA14_00300, PA14_00310, PA14_00320	24		phospholipase C, PlcB, putative peptidyl-prolyl isomerase, hypothetical protein	PA0026, PA0027, PA0028
21	3	NA	30523	34532	-	PA14_00340, PA14_00360, PA14_00380	NA		putative sulfate transporter, hypothetical protein, choline sulfatase	PA0029, PA0030, PA0031
22	1	34576	34645	35559	+	PA14_00400	69		LysR family transcriptional	PA0032
23	1	35475	35570	35947	+	PA14_00410	95		NA	NA
24	2	NA	35926	36922	-	PA14_00420, PA14_00430	NA		histidine phosphotransfer domain-containing, putative two-component response	PA0033, PA0034
25	2	39143	37108	39119	-	PA14_00440, PA14_00450	24		tryptophan synthase subunit, tryptophan synthase subunit	PA0035, PA0036
26	1	NA	39223	40110	+	PA14_00460	NA		transcriptional regulator TrpI	PA0037
27	1	40158	40211	40426	+	PA14_00470	53		hypothetical protein	PA0038
28	1	40438	40610	40837	+	PA14_00480	172		hypothetical protein	PA0039
29	1	NA	41133	42821	+	PA14_00490	NA		putative hemolysin activation/secretion	PA0040
30	1	NA	42934	53265	+	PA14_00510	NA		putative hemagglutinin	PA0041
31	1	NA	54577	54699	+	PA14_00520	NA		NA	NA
32	1	54844	54909	55304	+	PA14_00530	65		hypothetical protein	PA0042
33	1	NA	55575	56984	-	PA14_00550	NA		hypothetical protein	PA0043
34	1	57123	57148	58476	+	PA14_00560	25		exoenzyme T	PA0044
35	2	58999	59018	60088	+	PA14_00570, PA14_00580	19		putative lipoprotein, putative lipoprotein	PA0045, PA0046
36	1	NA	60241	60750	+	PA14_00590	NA		putative lipoprotein	PA0047
37	1	NA	60765	61148	-	PA14_00600	NA		putative transcriptional regulator	PA0048
38	1	63112	61430	63091	-	PA14_00620	21		hypothetical protein	PA0049
39	1	63570	63701	63841	+	PA14_00630	131		NA	NA
40	1	NA	64665	66497	+	PA14_00640	NA		potential phenazine-modifying enzyme	PA0051
41	1	67006	66550	66978	-	PA14_00650	28		hypothetical protein	PA0052
42	2	NA	67187	68280	-	PA14_00660, PA14_00670	NA		RNA 2'-phosphotransferase-like protein, hypothetical protein	PA0054, PA0055
43	1	NA	68346	69266	-	PA14_00680	NA		LysR family transcriptional	PA0056
44	1	NA	69374	70261	+	PA14_00690	NA		hypothetical protein	PA0057
45	1	NA	70324	71028	+	PA14_00700	NA		hypothetical protein	PA0058
46	1	71086	71112	71567	+	PA14_00710	26		osmotically inducible protein	PA0059
47	1	71625	71678	71911	+	PA14_00720	53		hypothetical protein	PA0060
48	1	NA	71923	72360	-	PA14_00730	NA		hypothetical protein	PA0061
49	1	72932	72417	72833	-	PA14_00740	99		putative lipoprotein	PA0062
50	1	NA	72925	74052	+	PA14_00750	NA		hypothetical protein	PA0063
51	1	75240	74060	75043	-	PA14_00760	197		hypothetical protein	PA0064
52	2	NA	75076	76276	-	PA14_00770, PA14_00780	NA		hypothetical protein, hypothetical protein	PA0065, PA0066
53	2	76328	76354	78671	+	PA14_00790, PA14_00800	26		oligopeptidase A, hypothetical protein	PA0067, PA0068
54	1	NA	78760	79818	+	PA14_00810	NA		putative DNA repair	PA0069
55	1	81545	80049	80963	-	PA14_00820	582		hypothetical protein	PA0070
56	7	NA	81025	92474	-	PA14_00830, PA14_00850, PA14_00860, PA14_00875, PA14_00890, PA14_00900, PA14_00910	NA		hypothetical protein, hypothetical protein, putative ATP-binding component, serine/threonine protein kinase, putative phosphoprotein phosphatase, hypothetical protein, hypothetical protein	PA0071, PA0072, PA0073, PA0074, PA0075, PA0076, PA0077
57	5	97711	92696	97409	-	PA14_00925, PA14_00940, PA14_00960, PA14_00970, PA14_00980	302		hypothetical protein, hypothetical protein, putative lipoprotein, NA, hypothetical protein	PA0078, PA0079, PA0080, NA, PA0081
58	1	97663	97777	98811	+	PA14_00990	114		hypothetical protein	PA0082
59	2	98785	98900	100927	+	PA14_01010, PA14_01020	115		hypothetical protein, hypothetical protein	PA0083, PA0084
60	1	100936	101003	101491	+	PA14_01030	67		hypothetical protein	PA0085
61	4	NA	101659	105881	+	PA14_01040, PA14_01060, PA14_01070, PA14_01080	NA		putative secretion protein, hypothetical protein, hypothetical protein, hypothetical protein	PA0086, PA0087, PA0088, PA0089
62	2	105773	105874	110560	+	PA14_01100, PA14_01110	101		putative ClpA/B-type chaperone, hypothetical protein	PA0090, PA0091
63	3	NA	110675	112514	-	PA14_01120, PA14_01130, PA14_01140	NA		hypothetical protein, NA, NA	PA0092, NA, NA
64	1	113068	112593	113027	-	PA14_01150	41		hypothetical protein	PA0094
65	7	113230	113281	121410	+	PA14_01160, PA14_01170, PA14_01180, PA14_01190, PA14_01200, PA14_01220, PA14_01230	51		hypothetical protein, hypothetical protein, hypothetical protein, 3-oxoacyl-(acyl carrier protein), hypothetical protein, hypothetical protein, hypothetical protein	PA0095, PA0096, PA0097, PA0098, PA0099, PA0100, PA0101
66	1	121654	121786	122514	+	PA14_01240	132		carbonic anhydrase	PA0102
67	1	NA	122725	124296	+	PA14_01250	NA		putative sulfate transporter	PA0103
68	1	NA	124433	125029	+	PA14_01270	NA		hypothetical protein	PA0104
69	4	125157	125293	129482	+	PA14_01290, PA14_01300, PA14_01310, PA14_01320	136		cytochrome c oxidase,, cytochrome c oxidase,, cytochrome C oxidase, cytochrome c oxidase,	PA0105, PA0106, PA0107, PA0108
70	1	129732	129498	129707	-	PA14_01330	25		hypothetical protein	PA0109
71	4	NA	129723	133148	+	PA14_01340, PA14_01350, PA14_01360, PA14_01380	NA		hypothetical protein, hypothetical protein, hypothetical protein, protoheme IX farnesyltransferase	PA0110, PA0111, PA0112, PA0113
72	1	133084	133174	133809	+	PA14_01390	90		hypothetical protein	PA0114
73	1	134327	133849	134301	-	PA14_01400	26		hypothetical protein	PA0115
74	1	134415	134433	134906	+	PA14_01410	18		hypothetical protein	PA0116
75	1	NA	135162	135890	+	PA14_01430	NA		putative short chain	PA0117
76	1	135890	135915	136502	+	PA14_01440	25		hypothetical protein	PA0118
77	1	136662	136732	138081	+	PA14_01460	70		C4-dicarboxylate transporter DctA	PA0119
78	1	NA	138130	138816	+	PA14_01470	NA		putative transcriptional regulator	PA0120
79	1	NA	138917	139651	+	PA14_01480	NA		hypothetical protein	PA0121
80	1	139720	139831	140241	+	PA14_01490	111		putative hemolysin	PA0122
81	1	NA	140273	141181	-	PA14_01500	NA		putative transcriptional regulator	PA0123
82	2	142028	141481	141986	-	PA14_01510, PA14_01520	42		hypothetical protein, hypothetical protein	PA0124, PA0125
83	1	NA	142162	142785	-	PA14_01540	NA		hypothetical protein	PA0126
84	1	142861	142886	143386	+	PA14_01550	25		putative lipoprotein	PA0127
85	1	143428	143458	143799	+	PA14_01560	30		hypothetical protein	PA0128
86	1	NA	143881	145308	-	PA14_01580	NA		gamma-aminobutyrate permease	PA0129
87	1	147054	145477	146970	-	PA14_01600	84		putative aldehyde dehydrogenase	PA0130
88	2	148744	147054	148687	-	PA14_01610, PA14_01620	57		hypothetical protein, beta alanine--pyruvate transaminase	PA0131, PA0132
89	1	NA	148823	149740	+	PA14_01640	NA		LysR family transcriptional	PA0133
90	1	151354	149853	151223	-	PA14_01660	131		guanine deaminase	PA0134
91	3	NA	152381	156052	+	PA14_01670, PA14_01680, PA14_01690	NA		putative ATP-binding component, putative permease of, putative permease of	PA0136, PA0137, PA0138
92	1	156127	156164	156727	+	PA14_01710	37		alkyl hydroperoxide reductase	PA0139
93	1	NA	156872	158437	+	PA14_01720	NA		alkyl hydroperoxide reductase	PA0140
94	1	159627	158517	159413	-	PA14_01730	214		hypothetical protein	PA0141
95	1	159743	159868	161217	+	PA14_01750	125		hydroxydechloroatrazine ethylaminohydrolase	PA0142
96	1	161303	161387	162376	+	PA14_01760	84		nonspecific ribonucleoside hydrolase	PA0143
97	2	163972	162413	163922	-	PA14_01770, PA14_01780	50		NA, putative nucleoside 2-deoxyribosyltransferase	NA, PA0144
98	1	NA	164072	164590	-	PA14_01790	NA		putative nucleoside 2-deoxyribosyltransferase	PA0145
99	1	NA	164828	165925	+	PA14_01800	NA		hypothetical protein	PA0146
100	1	NA	165998	166960	+	PA14_01810	NA		putative oxidoreductase	PA0147
101	1	167037	167065	168015	+	PA14_01830	28		adenosine deaminase	PA0148
102	2	NA	168212	169749	+	PA14_01840, PA14_01860	NA		RNA polymerase ECF-subfamily, putative transmembrane sensor	PA0149, PA0150
103	1	NA	169897	172284	+	PA14_01870	NA		putative TonB-dependent receptor	PA0151
104	1	NA	172662	173489	+	PA14_01890	NA		transcriptional regulator PcaQ	PA0152
105	2	173568	173624	174959	+	PA14_01900, PA14_01910	56		protocatechuate 3,4-dioxygenase, beta, protocatechuate 3,4-dioxygenase, alpha	PA0153, PA0154
106	1	NA	175175	176014	+	PA14_01930	NA		transcriptional regulator PcaR	PA0155
107	3	176108	176167	181429	+	PA14_01940, PA14_01960, PA14_01970	59		putative RND efflux, putative RND efflux, putative RND efflux	PA0156, PA0157, PA0158
108	1	181430	181628	182566	+	PA14_01980	198		LysR family transcriptional	PA0159
109	1	NA	182682	182867	+	PA14_01990	NA		hypothetical protein	PA0160
110	1	183070	183147	183299	+	PA14_02010	77		hypothetical protein	PA0161
111	1	183406	183454	184788	+	PA14_02020	48		putative outer membrane	PA0162
112	1	185636	184817	185614	-	PA14_02030	22		AraC family transcriptional	PA0163
113	1	NA	185692	187308	+	PA14_02050	NA		putative gamma-glutamyltranspeptidase	PA0164
114	1	NA	187980	188816	+	PA14_02060	NA		hypothetical protein	PA0165
115	1	NA	189058	190464	+	PA14_02070	NA		putative transporter	PA0166
116	2	190534	190557	191818	+	PA14_02090, PA14_02100	23		TetR family transcriptional, hypothetical protein	PA0167, PA0168
117	1	NA	191825	192532	-	PA14_02110	NA		GGDEF domain-containing protein	PA0169
118	3	NA	192659	195608	-	PA14_02130, PA14_02140, PA14_02150	NA		hypothetical protein, hypothetical protein, hypothetical protein	PA0170, PA0171, PA0172
119	3	NA	195871	198390	-	PA14_02180, PA14_02190, PA14_02200	NA		chemotaxis-specific methylesterase, hypothetical protein, putative chemotaxis protein	PA0173, PA0174, PA0175
120	1	200583	198460	200499	-	PA14_02220	84		putative chemotaxis transducer	PA0176
121	2	203065	200535	202926	-	PA14_02230, PA14_02250	139		putative purine-binding chemotaxis, putative two-component sensor	PA0177, PA0178
122	1	203419	202954	203319	-	PA14_02260	100		putative two-component response	PA0179
123	1	NA	203517	204689	-	PA14_02270	NA		putative chemotaxis transducer	PA0180
124	1	NA	204880	205815	-	PA14_02290	NA		LysR family transcriptional	PA0181
125	1	NA	205932	206684	+	PA14_02300	NA		3-ketoacyl-(acyl-carrier-protein) reductase	PA0182
126	1	NA	206784	208394	-	PA14_02310	NA		arylsulfatase	PA0183
127	2	NA	208482	210934	-	PA14_02330, PA14_02340	NA		ABC transporter ATP-binding, putative permease of	PA0184, PA0185
128	1	NA	211201	212262	+	PA14_02360	NA		putative binding protein	PA0186
129	1	NA	212285	213643	-	PA14_02370	NA		putative porin	PA0189
130	1	NA	213891	214616	+	PA14_02380	NA		putative acid phosphatase	PA0190
131	1	NA	214640	215557	-	PA14_02390	NA		putative transcriptional regulator	PA0191
132	1	NA	215908	218280	+	PA14_02410	NA		putative TonB-dependent receptor	PA0192
133	1	NA	218321	219223	+	PA14_02420	NA		hypothetical protein	PA0193
134	1	NA	219291	220190	+	PA14_02435	NA		hypothetical protein	PA0194
135	3	220671	220837	223775	+	PA14_02450, PA14_02460, PA14_02470	166		putative NAD(P) transhydrogenase,, putative NAD(P) transhydrogenase,, pyridine nucleotide transhydrogenase,	PA0195, PA0195.1, PA0196
136	3	224050	224119	226082	+	PA14_02490, PA14_02500, PA14_02510	69		hypothetical protein, transport protein ExbB, transport protein ExbD	PA0197, PA0198, PA0199
137	1	226500	226263	226475	-	PA14_02520	25		hypothetical protein	PA0200
138	1	226664	226691	227272	+	PA14_02530	27		hypothetical protein	PA0201
139	9	227357	227383	234756	+	PA14_02550, PA14_02560, PA14_02570, PA14_02580, PA14_02590, PA14_02610, PA14_02620, PA14_02630, PA14_02640	26		malonate decarboxylase alpha, triphosphoribosyl-dephospho-CoA synthase, malonate decarboxylase subunit, malonate decarboxylase subunit, malonate decarboxylase gamma, phosphoribosyl-dephospho-CoA transferase, putative epsilon subunit, putative malonate carrier, putative malonate transporter,	PA0208, PA0209, PA0210, PA0211, PA0212, PA0213, PA0214, PA0215, PA0216
140	1	235794	234841	235770	-	PA14_02650	24		putative malonate utilization	PA0217
141	1	NA	236099	237019	-	PA14_02660	NA		LysR family transcriptional	PA0218
142	4	NA	237370	242986	+	PA14_02680, PA14_02690, PA14_02700, PA14_02720	NA		putative aldehyde dehydrogenase, putative amino acid, putative aminotransferase, hypothetical protein	PA0219, PA0220, PA0221, PA0222
143	1	NA	243064	243945	-	PA14_02730	NA		putative dihydrodipicolinate synthetase	PA0223
144	1	NA	244005	244787	-	PA14_02740	NA		class II aldolase/adducin	PA0224
145	1	244719	244942	245481	+	PA14_02750	223		putative transcriptional regulator	PA0225
146	3	245590	245632	248464	+	PA14_02760, PA14_02770, PA14_02790	42		putative CoA transferase,, putative CoA transferase,, beta-ketoadipyl CoA thiolase	PA0226, PA0227, PA0228
147	1	NA	248614	249912	+	PA14_02810	NA		dicarboxylic acid transporter	PA0229
148	3	249899	249935	252532	+	PA14_02830, PA14_02840, PA14_02850	36		3-carboxy-cis,cis-muconate cycloisomerase, beta-ketoadipate enol-lactone hydrolase, gamma-carboxymuconolactone decarboxylase	PA0230, PA0231, PA0232
149	1	NA	252660	253601	+	PA14_02870	NA		putative transcriptional regulator	PA0233
150	1	NA	253792	254625	+	PA14_02890	NA		hypothetical protein	PA0234
151	1	NA	254764	256110	-	PA14_02900	NA		4-hydroxybenzoate transporter PcaK	PA0235
152	1	NA	256416	257195	+	PA14_02910	NA		IclR family transcriptional	PA0236
153	2	NA	257439	259320	+	PA14_02930, PA14_02960	NA		putative oxidoreductase, hypothetical protein	PA0237, PA0238
154	1	259382	259470	260348	+	PA14_02970	88		hypothetical protein	PA0239
155	1	NA	260374	261639	-	PA14_02980	NA		putative porin	PA0240
156	1	NA	261705	263030	-	PA14_02990	NA		putative MFS transporter	PA0241
157	1	NA	263577	265481	+	PA14_03000	NA		hypothetical protein	PA0242
158	1	265545	265574	266242	+	PA14_03010	29		TetR family transcriptional	PA0243
159	2	NA	266282	267579	-	PA14_03020, PA14_03030	NA		shikimate 5-dehydrogenase, 3-dehydroquinate dehydratase	PA0244, PA0245
160	1	NA	267696	269201	-	PA14_03040	NA		putative MFS transporter	PA0246
161	1	270629	269376	270560	-	PA14_03050	69		4-hydroxybenzoate 3-monooxygenase	PA0247
162	1	NA	270738	271604	+	PA14_03070	NA		putative transcriptional regulator	PA0248
163	1	NA	271601	272047	-	PA14_03080	NA		putative acetyltransferase	PA0249
164	1	272587	272125	272559	-	PA14_03090	28		CBS domain-containing protein	PA0250
165	1	NA	272724	273365	-	PA14_03100	NA		hypothetical protein	PA0251
166	1	NA	273633	273920	-	PA14_03110	NA		hypothetical protein	PA0252
167	1	274511	274012	274488	-	PA14_03120	23		putative transcriptional regulator	PA0253
168	1	276047	274529	276019	-	PA14_03130	28		hypothetical protein	PA0254
169	1	NA	276153	276839	-	PA14_03150	NA		hypothetical protein	PA0255
170	1	277978	277003	277935	-	PA14_03160	43		hypothetical protein	PA0256
171	2	278398	278510	279531	+	PA14_03163, PA14_03166	112		NA, NA	NA, NA
172	1	NA	279718	280557	-	PA14_03170	NA		hypothetical protein	PA0987
173	1	280871	280590	280853	-	PA14_03180	18		hypothetical protein	PA0986
174	4	288324	280973	288272	-	PA14_03190, PA14_03200, PA14_03210, PA14_03220	52		hypothetical protein, hypothetical protein, hypothetical protein, hypothetical protein	PA0259, PA0260, PA0261, PA0262
175	1	289271	288454	288972	-	PA14_03240	299		NA	NA
176	1	291320	290802	291137	-	PA14_NovelOrf_001	183	TU contains unannotated ORF	Unannotated ORF	PA14_NovelOrf_001
177	2	291633	291676	293936	+	PA14_03250, PA14_03265	43	Annotation of ORF corrected by 5' end sequencing (original ORF: 291568..293184)	NA, NA	NA, NA
178	2	293823	294101	298367	+	PA14_03270, PA14_03285	278		NA, NA	NA, NA
179	2	298411	298567	299717	+	PA14_03290, PA14_03300	156		NA, hypothetical protein	NA, PA0978
180	1	NA	300333	301931	+	PA14_03310	NA		NA	NA
181	1	303906	302683	303804	-	PA14_03320	102		NA	NA
182	2	305711	303810	305599	-	PA14_03330, PA14_03340	112		NA, NA	NA, NA
183	2	307755	305950	307666	-	PA14_03350, PA14_03360	89		NA, NA	NA, NA
184	2	309483	307985	309462	-	PA14_03370, PA14_NovelOrf_002	21	TU contains unannotated ORF	NA, PA14_NovelOrf_002	NA, XRE family transcriptional regulator
185	1	309547	309749	311728	+	PA14_03380	202		NA	NA
186	2	NA	311665	312499	-	PA14_03390, PA14_03400	NA		NA, NA	NA, NA
187	1	312525	312549	312912	+	PA14_NovelOrf_003	24	TU contains unannotated ORF	Unannotated ORF	PA14_NovelOrf_003
188	1	313034	312961	313034	-	PA14_03410	0		NA	NA
189	1	NA	313222	313638	-	PA14_03420	NA		hypothetical protein	PA0264
190	1	313596	313663	315114	+	PA14_03430	67		succinate-semialdehyde dehydrogenase I	PA0265
191	1	315131	315359	316639	+	PA14_03450	228		4-aminobutyrate aminotransferase	PA0266
192	1	316788	316965	318164	+	PA14_03470	177		hypothetical protein	PA0267
193	1	NA	318332	319753	-	PA14_03480	NA		GntR family transcriptional	PA0268
194	3	319822	319880	321054	+	PA14_03490, PA14_03510, PA14_03520	58		hypothetical protein, hypothetical protein, hypothetical protein	PA0269, PA0270, PA0271
195	1	NA	321051	321983	-	PA14_03530	NA		transcriptional regulator	PA0272
196	1	NA	322033	323247	-	PA14_03550	NA		putative MFS transporter	PA0273
197	1	NA	323410	324180	-	PA14_03560	NA		hypothetical protein	PA0274
198	1	NA	324289	324975	-	PA14_03580	NA		putative transcriptional regulator	PA0275
199	1	NA	325051	325566	+	PA14_03590	NA		hypothetical protein	PA0276
200	1	NA	325606	326364	-	PA14_03610	NA		putative putative Zn-dependent	PA0277
201	1	NA	326536	327288	-	PA14_03620	NA		hypothetical protein	PA0278
202	1	NA	327382	328080	+	PA14_03630	NA		ArsR family transcriptional	PA0279
203	4	NA	328093	331944	-	PA14_03650, PA14_03670, PA14_03680, PA14_03700	NA		sulfate transport protein, sulfate transport protein, sulfate transport protein, sulfate-binding protein precursor	PA0280, PA0281, PA0282, PA0283
204	1	NA	332121	332303	-	PA14_03710	NA		hypothetical protein	PA0284
205	1	NA	332467	334749	-	PA14_03720	NA		sensory box GGDEF	PA0285
206	1	334862	334920	336098	+	PA14_03730	58		putative fatty acid	PA0286
207	2	NA	336327	338724	+	PA14_03760, PA14_03770	NA		putative sodium:solute symporter, agmatinase	PA0287, PA0288
208	1	NA	338777	339739	+	PA14_03780	NA		putative transcriptional regulator	PA0289
209	1	339822	339852	340823	+	PA14_03790	30		sensory box GGDEF	PA0290
210	1	341409	341437	342828	+	PA14_03800	28		anaerobically-induced outer membrane	PA0291
211	1	344046	342926	344032	-	PA14_03810	14		agmatine deiminase	PA0292
212	1	NA	344118	344996	-	PA14_03830	NA		N-carbamoylputrescine amidohydrolase	PA0293
213	1	NA	345159	345824	-	PA14_03840	NA		transcriptional regulator AguR	PA0294
214	1	347138	345887	346948	-	PA14_03855	190		periplasmic polyamine binding	PA0295
215	1	348625	347204	348580	-	PA14_03860	45		putative glutamine synthetase	PA0296
216	1	348827	348859	349611	+	PA14_03870	32		putative glutamine amidotransferase	PA0297
217	1	349571	349652	351010	+	PA14_03880	81		glutamine synthetase	PA0298
218	1	350728	351076	352446	+	PA14_03900	348		putative aminotransferase	PA0299
219	1	352350	352562	353665	+	PA14_03920	212		polyamine transport protein	PA0300
220	1	353997	354084	355181	+	PA14_03930	87		polyamine transport protein	PA0301
221	3	355220	355236	358250	+	PA14_03940, PA14_03950, PA14_03960	16		polyamine transport protein, polyamine transport protein, polyamine transport protein	PA0302, PA0303, PA0304
222	1	360858	358448	360835	-	PA14_03980	23		hypothetical protein	PA0305
223	1	360929	360946	361998	+	PA14_04000	17		putative transcriptional regulator	PA0306
224	1	362522	361977	362480	-	PA14_04010	42		NA	NA
225	1	363181	362585	363169	-	PA14_04020	12	Annotation of ORF corrected by 5' end sequencing (original ORF: 362585..363196)	hypothetical protein	PA0307
226	1	363261	363273	364214	+	PA14_04030	12	Annotation of ORF corrected by 5' end sequencing (original ORF: 363195..364214)	hypothetical protein	PA0308
227	1	NA	364234	364986	-	PA14_04040	NA		hypothetical protein	PA0309
228	1	365104	365104	365733	+	PA14_04050	0	Annotation of ORF corrected by 5' end sequencing (original ORF: 365035..365733)	putative proline hydroxylase	PA0310
229	1	NA	365755	366309	-	PA14_04060	NA		hypothetical protein	PA0311
230	1	366553	366575	367069	+	PA14_04070	22		hypothetical protein	PA0312
231	2	368654	367074	368608	-	PA14_04080, PA14_04090	46		putative permease of, putative binding protein	PA0313, PA0314
232	1	368789	368901	369338	+	PA14_04100	112		hypothetical protein	PA0315
233	1	NA	369396	370625	-	PA14_04110	NA		D-3-phosphoglycerate dehydrogenase	PA0316
234	1	370760	370829	372223	+	PA14_04140	69		hypothetical protein	PA0317
235	2	372228	372315	374068	+	PA14_04150, PA14_04160	87		hypothetical protein, putatitve transcriptional regulator	PA0318, PA0319
236	1	374125	374152	374502	+	PA14_04180	27		hypothetical protein	PA0320
237	2	NA	374583	377027	-	PA14_04190, PA14_04210	NA		acetylpolyamine aminohydrolase, putative transporter	PA0321, PA0322
238	4	NA	377448	381299	-	PA14_04220, PA14_04230, PA14_04240, PA14_04250	NA		putative binding protein, putative permease of, putative permease of, putative ATP-binding component	PA0323, PA0324, PA0325, PA0326
239	1	381633	381663	382592	+	PA14_04270	30	Annotation of ORF corrected by 5' end sequencing (original ORF: 381627..382592)	putative transcriptional regulator	PA0327
240	1	384619	382631	384574	-	PA14_04290	45		hypothetical protein	PA0328
241	1	385261	384875	385207	-	PA14_04300	54		hypothetical protein	PA0329
242	1	386115	385330	386001	-	PA14_04310	114		ribose-5-phosphate isomerase A	PA0330
243	1	386232	386260	387774	+	PA14_04320	28		threonine dehydratase	PA0331
244	3	387815	387894	390147	+	PA14_04330, PA14_04340, PA14_04350	79		hypothetical protein, hypothetical protein, NA	PA0332, PA0333, NA
245	2	NA	390120	392064	-	PA14_04370, PA14_04380	NA		putative MFS transporter, hypothetical protein	PA0334, PA0335
246	2	392242	392268	395049	+	PA14_04390, PA14_04410	26		dinucleoside polyphosphate hydrolase, phosphoenolpyruvate-protein phosphotransferase	PA0336, PA0337
247	1	395050	395075	396205	+	PA14_04420	25		hypothetical protein	PA0338
248	1	NA	396209	396964	-	PA14_04430	NA		hypothetical protein	PA0339
249	1	397067	397086	397889	+	PA14_04440	19		putative permease	PA0340
250	1	397877	397899	398699	+	PA14_04460	22		prolipoprotein diacylglyceryl transferase	PA0341
251	1	398847	398905	399699	+	PA14_04480	58		thymidylate synthase	PA0342
252	3	403377	399726	403315	-	PA14_04490, PA14_04510, PA14_04520	62		hypothetical protein, hypothetical protein, hypothetical protein	PA0343, PA0344, PA0345
253	1	NA	403507	403869	+	PA14_04530	NA		hypothetical protein	PA0346
254	1	NA	403906	405057	-	PA14_04550	NA		glycerophosphoryl diester phosphodiesterase,	PA0347
255	2	NA	405267	407398	+	PA14_04560, PA14_04570	NA		hypothetical protein, hypothetical protein	PA0348, PA0349
256	1	NA	407469	407975	+	PA14_04580	NA		dihydrofolate reductase	PA0350
257	1	NA	407991	408464	-	PA14_04590	NA		hypothetical protein	PA0351
258	1	NA	408603	409988	-	PA14_04610	NA		putative transporter	PA0352
259	1	412090	410218	412056	-	PA14_04630	34		dihydroxy-acid dehydratase	PA0353
260	2	414220	412384	414192	-	PA14_04640, PA14_04650	28		hypothetical protein, protease PfpI	PA0354, PA0355
261	1	414330	414409	415233	+	PA14_04660	79		hypothetical protein	PA0356
262	2	415271	415292	416759	+	PA14_04670, PA14_04680	21		formamidopyrimidine-DNA glycosylase, hypothetical protein	PA0357, PA0358
263	1	416805	416842	417186	+	PA14_04690	37		hypothetical protein	PA0359
264	1	417391	417456	418442	+	PA14_04700	65		hypothetical protein	PA0360
265	1	419039	418555	418986	-	PA14_04710	53		NA	NA
266	1	420928	419138	420871	-	PA14_04730	57		putative gamma-glutamyltranspeptidase	PA0361
267	1	421298	420999	421250	-	PA14_04750	48		ferredoxin (4Fe-4S)	PA0362
268	1	421879	421371	421850	-	PA14_04760	29		phosphopantetheine adenylyltransferase	PA0363
269	3	425775	421999	425683	-	PA14_04780, PA14_04790, PA14_04810	92		oxidoreductase, hypothetical protein, putative aldehyde dehydrogenase	PA0364, PA0365, PA0366
270	1	NA	425972	426619	+	PA14_04820	NA		TetR family transcriptional	PA0367
271	6	432205	426604	432154	-	PA14_04830, PA14_04840, PA14_04850, PA14_04860, PA14_04870, PA14_04890	51		NA, hypothetical protein, hypothetical protein, putative methyltransferase, hypothetical protein, putative zinc protease	NA, PA0368, PA0369, PA0370, PA0371, PA0372
272	3	432223	432275	435305	+	PA14_04900, PA14_04910, PA14_04920	52		signal recognition particle, cell division ATP-binding, cell division protein	PA0373, PA0374, PA0375
273	1	435396	435419	436273	+	PA14_04930	23		RNA polymerase factor	PA0376
274	1	NA	436338	436943	+	PA14_04940	NA		hypothetical protein	PA0377
275	1	NA	436948	437679	-	PA14_04950	NA		monofunctional biosynthetic peptidoglycan	PA0378
276	2	NA	437716	438396	+	PA14_04960, PA14_04970	NA		hypothetical protein, sulfur carrier protein	PA0379, PA0380
277	1	438434	438455	439252	+	PA14_04980	21		thiazole synthase	PA0381
278	1	439259	439406	440077	+	PA14_05000	147		NA	NA
279	1	NA	440240	441586	+	PA14_05010	NA		hypothetical protein	PA0383
280	1	NA	441599	441856	-	PA14_05020	NA		hypothetical protein	PA0384
281	1	NA	441918	442241	-	PA14_05030	NA		hypothetical protein	PA0385
282	1	NA	442322	443476	-	PA14_05040	NA		coproporphyrinogen III oxidase	PA0386
283	2	444797	443597	444606	-	PA14_05050, PA14_05060	191		putative deoxyribonucleotide triphosphate, hypothetical protein	PA0387, PA0388
284	2	446529	444738	446505	-	PA14_05070, PA14_05080	24		putative methionine biosynthesis, homoserine O-acetyltransferase	PA0389, PA0390
285	1	NA	446594	448561	-	PA14_05110	NA		hypothetical protein	PA0391
286	1	NA	448669	448839	-	PA14_05120	NA		NA	NA
287	3	451267	448962	451091	-	PA14_05130, PA14_05150, PA14_05160	176		hypothetical protein, pyrroline-5-carboxylate reductase, hypothetical protein	PA0392, PA0393, PA0394
288	2	451099	451306	453666	+	PA14_05180, PA14_05190	207		twitching motility protein, twitching motility protein	PA0395, PA0396
289	1	NA	453674	454573	-	PA14_05200	NA		putative cation efflux	PA0397
290	1	454689	454728	455132	+	PA14_05210	39		hypothetical protein	PA0398
291	2	455347	455375	457929	+	PA14_05220, PA14_05230	28		cystathionine beta-synthase, cystathionine gamma-lyase	PA0399, PA0400
292	3	460988	458157	460965	-	PA14_05250, PA14_05260, PA14_05270	23		dihydroorotase, aspartate carbamoyltransferase catalytic, bifunctional pyrimidine regulatory	PA0401, PA0402, PA0403
293	2	462080	461077	462080	-	PA14_05280, PA14_05290	0		Holliday junction resolvase-like, hypothetical protein	PA0404, PA0405
294	1	NA	462129	463088	-	PA14_05300	NA		TonB domain-containing protein	PA0406
295	1	464189	463169	464122	-	PA14_05310	67		glutathione synthetase	PA0407
296	3	464260	464377	465783	+	PA14_05320, PA14_05330, PA14_05340	117		twitching motility protein, twitching motility protein, twitching motility protein	PA0408, PA0409, PA0410
297	7	465832	465868	479311	+	PA14_05360, PA14_05380, PA14_05390, PA14_05400, PA14_05410, PA14_05420, PA14_05430	36		twitching motility protein, methyltransferase PilK, ChpA, methylesterase, putative chemotaxis protein, putative transcriptional regulator, putative chemotaxis protein	PA0411, PA0412, PA0413, PA0414, PA0415, PA0416, PA0417
298	3	483008	479319	482987	-	PA14_05440, PA14_05450, PA14_05460	21		hypothetical protein, 16S ribosomal RNA, adenosylmethionine--8-amino-7-oxononanoate	PA0418, PA0419, PA0420
299	1	483127	483161	484651	+	PA14_05480	34		hypothetical protein	PA0421
300	2	484809	484832	485988	+	PA14_05500, PA14_05510	23		hypothetical protein, hypothetical protein	PA0422, PA0423
301	1	NA	486057	486500	-	PA14_05520	NA		multidrug resistance operon	PA0424
302	3	486754	486775	492541	+	PA14_05530, PA14_05540, PA14_05550	21		RND multidrug efflux, RND multidrug efflux, major intrinsic multiple	PA0425, PA0426, PA0427
303	1	NA	492637	494556	-	PA14_05560	NA		ATP-dependent RNA helicase	PA0428
304	4	499024	494807	498866	-	PA14_05580, PA14_05590, PA14_05600, PA14_05620	158	The 5' UTR contains a SAH riboswitch (RF01057)	hypothetical protein, 5,10-methylenetetrahydrofolate reductase, hypothetical protein, S-adenosyl-L-homocysteine hydrolase	PA0429, PA0430, PA0431, PA0432
305	1	NA	499155	499589	+	PA14_05630	NA		hypothetical protein	PA0433
306	2	NA	499715	503396	+	PA14_05640, PA14_05650	NA		hypothetical protein, hypothetical protein	PA0434, PA0435
307	1	503460	503481	504101	+	PA14_05660	21		putative transcriptional regulator	PA0436
308	2	NA	504138	506649	-	PA14_05690, PA14_05700	NA		cytosine deaminase, cytosine permease	PA0437, PA0438
309	2	NA	506831	509472	-	PA14_05740, PA14_05750	NA		dihydropyrimidine dehydrogenase, putative oxidoreductase	PA0439, PA0440
310	1	NA	509567	511006	-	PA14_05770	NA		phenylhydantoinase	PA0441
311	1	NA	511113	511229	-	PA14_05775	NA		NA	NA
312	1	NA	511622	513112	+	PA14_05790	NA		putative transporter	PA0443
313	1	NA	513171	514454	+	PA14_05810	NA		allantoate amidohydrolase	PA0444
314	1	515989	514655	515878	-	PA14_05820	111		hypothetical protein	PA0446
315	1	517230	515998	517179	-	PA14_05840	51		glutaryl-CoA dehydrogenase	PA0447
316	1	517306	517400	518308	+	PA14_05850	94		LysR family transcriptional	PA0448
317	1	518319	518460	518864	+	PA14_05860	141		hypothetical protein	PA0449
318	1	NA	518907	520529	-	PA14_05870	NA		putative phosphate transporter	PA0450
319	2	NA	520909	523031	+	PA14_05880, PA14_05890	NA		putative membrane-bound protease, putative stomatin-like protein	PA0451, PA0452
320	1	NA	523139	523870	+	PA14_05910	NA		NA	NA
321	1	NA	523867	526068	-	PA14_05920	NA		hypothetical protein	PA0454
322	1	NA	526330	527706	-	PA14_05950	NA		ATP-dependent RNA helicase	PA0455
323	1	527903	528054	528263	+	PA14_05960	151		putative cold-shock protein	PA0456
324	1	NA	528414	528938	+	PA14_05970	NA		hypothetical protein	PA0457
325	1	530498	529041	530474	-	PA14_05990	24		EmrB/QacA family drug	PA0458
326	2	530665	531095	534327	+	PA14_06000, PA14_06010	430		putative ClpA/B protease, hypothetical protein	PA0459, PA0460
327	1	535363	534444	535331	-	PA14_06030	32		putative acyltransferase	PA0461
328	1	535446	535474	535983	+	PA14_06040	28	Annotation of ORF corrected by 5' end sequencing (original ORF: 535279..535983)	hypothetical protein	PA0462
329	4	NA	536068	539993	+	PA14_06060, PA14_06070, PA14_06080, PA14_06090	NA		DNA-binding response regulator, sensory histidine kinase, hypothetical protein, hypothetical protein	PA0463, PA0464, PA0465, PA0466
330	2	541770	540138	541727	-	PA14_06120, PA14_06130	43		hypothetical protein, hypothetical protein	PA0467, PA0468
331	1	541788	541813	542670	+	PA14_06150	25		hypothetical protein	PA0469
332	3	NA	542843	546826	-	PA14_06160, PA14_06170, PA14_06180	NA		putative hydroxamate-type ferrisiderophore, putative transmembrane sensor, ion	PA0470, PA0471, PA0472
333	1	546968	546995	547744	+	PA14_06190	27		putative glutathione S-transferase	PA0473
334	1	NA	547884	548288	+	PA14_06200	NA		hypothetical protein	PA0474
335	1	548309	548338	548907	+	PA14_06210	29		putative transcriptional regulator	PA0475
336	1	NA	548941	550668	-	PA14_06230	NA		putative permease	PA0476
337	1	551973	551016	551942	-	PA14_06240	31		LysR family transcriptional	PA0477
338	1	NA	552030	552506	+	PA14_06250	NA		GNAT family acetyltransferase	PA0478
339	1	553547	552585	553523	-	PA14_06260	24		LysR family transcriptional	PA0479
340	2	NA	553627	554910	+	PA14_06270, PA14_06280	NA		putative hydrolase, hypothetical protein	PA0480, PA0481
341	1	557198	554958	557135	-	PA14_06290	63		malate synthase G	PA0482
342	2	557422	557442	558432	+	PA14_06300, PA14_06310	20		GNAT family acetyltransferase, ACT domain-containing protein	PA0483, PA0484
343	1	NA	559121	560017	-	PA14_06320	NA		hypothetical protein	PA0485
344	1	561218	560220	561194	-	PA14_06330	24		serine/threonine protein kinase	PA0486
345	1	562040	561256	562014	-	PA14_06340	26		putative molybdenum transport	PA0487
346	1	NA	562082	562402	-	PA14_06350	NA		hypothetical protein	PA0488
347	1	NA	562444	563169	-	PA14_06360	NA		putative phosphoribosyl transferase	PA0489
348	1	NA	563308	563601	-	PA14_06390	NA		hypothetical protein	PA0490
349	1	NA	563655	564581	-	PA14_06400	NA		LysR family transcriptional	PA0491
350	1	NA	564699	565457	+	PA14_06420	NA		hypothetical protein	PA0492
351	4	NA	565534	569016	+	PA14_06430, PA14_06450, PA14_06460, PA14_06480	NA		hypothetical protein, acetyl-CoA carboxylase biotin, hypothetical protein, putative hydrolase	PA0493, PA0494, PA0495, PA0496
352	1	569548	569617	570675	+	PA14_06500	69		biotin synthase	PA0500
353	1	NA	570781	571986	+	PA14_06510	NA		8-amino-7-oxononanoate synthase	PA0501
354	3	571953	571979	574208	+	PA14_06530, PA14_06540, PA14_06570	26		putative biotin biosynthesis, putative biotin synthesis, ion of dethiobiotin	PA0502, PA0503, PA0504
355	1	574274	574317	574547	+	PA14_06580	43		hypothetical protein	PA0505
356	1	574757	574888	576693	+	PA14_06600	131		putative acyl-CoA dehydrogenase	PA0506
357	1	NA	576906	578702	+	PA14_06620	NA		putative acyl-CoA dehydrogenase	PA0507
358	1	578923	578977	580755	+	PA14_06640	54		putative acyl-CoA dehydrogenase	PA0508
359	11	NA	581088	590077	-	PA14_06650, PA14_06660, PA14_06670, PA14_06680, PA14_06690, PA14_06700, PA14_06710, PA14_06720, PA14_06730, PA14_06740, PA14_06750	NA		putative c-type cytochrome, putative uroporphyrin-III c-methyltransferase, heme d1 biosynthesis, hypothetical protein, putative transcriptional regulator, heme d1 biosynthesis, putative transcriptional regulator, heme d1 biosynthesis, putative c-type cytochrome, cytochrome c-551 precursor, nitrite reductase precursor	PA0509, PA0510, PA0511, PA0512, PA0513, PA0514, PA0515, PA0516, PA0517, PA0518, PA0519
360	1	590251	590293	591075	+	PA14_06770	42		regulatory protein NirQ	PA0520
361	5	NA	591110	595669	+	PA14_06790, PA14_06800, PA14_06810, PA14_06830, PA14_06840	NA		putative cytochrome c, hypothetical protein, nitric-oxide reductase subunit, nitric-oxide reductase subunit, putative dinitrification protein	PA0521, PA0522, PA0523, PA0524, PA0525
362	2	NA	595676	596637	-	PA14_06860, PA14_06870	NA		hypothetical protein, transcriptional regulator Dnr	PA0526, PA0527
363	1	NA	596840	596963	+	PA14_06875	NA		NA	NA
364	1	NA	596990	597868	-	PA14_06880	NA		LysR family transcriptional	PA0528
365	4	597940	597970	600794	+	PA14_06890, PA14_06900, PA14_06920, PA14_06930	30		hypothetical protein, NA, putative class III, putative glutamine amidotransferase	PA0529, NA, PA0530, PA0531
366	1	NA	600869	601375	-	PA14_06940	NA		hypothetical protein	PA0532
367	1	NA	601418	602908	+	PA14_06950	NA		LuxR family transcriptional	PA0533
368	2	603212	603247	605108	+	PA14_06960, PA14_06970	35		hypothetical protein, Cro/CI family transcriptional	PA0534, PA0535
369	2	606882	605219	606856	-	PA14_06980, PA14_06990	26		hypothetical protein, hypothetical protein	PA0536, PA0537
370	1	NA	606944	607453	-	PA14_07000	NA		disulfide bond formation	PA0538
371	1	NA	607682	608512	+	PA14_07010	NA		hypothetical protein	PA0539
372	1	NA	608582	608968	+	PA14_07020	NA		hypothetical protein	PA0540
373	1	609048	609082	609540	+	PA14_07030	34		putative cytochrome c'	PA0541
374	1	610252	609732	610151	-	PA14_07040	101		hypothetical protein	PA0542
375	1	NA	610401	611369	+	PA14_07050	NA		hypothetical protein	PA0543
376	1	NA	611373	612116	-	PA14_07060	NA		hypothetical protein	PA0544
377	1	NA	612321	613625	+	PA14_07070	NA		hypothetical protein	PA0545
378	1	614963	613682	614872	-	PA14_07090	91		S-adenosylmethionine synthetase	PA0546
379	1	615889	614888	615889	-	PA14_07110	0		ArsR family transcriptional	PA0547
380	1	616085	616135	618132	+	PA14_07130	50		transketolase	PA0548
381	1	NA	618132	619196	+	PA14_07140	NA		hypothetical protein	PA0549
382	1	619999	619177	619974	-	PA14_07150	25		hypothetical protein	PA0550
383	1	620154	620189	621250	+	PA14_07170	35		D-erythrose 4-phosphate dehydrogenase	PA0551
384	2	621070	621256	622692	+	PA14_07190, PA14_07200	186		phosphoglycerate kinase, hypothetical protein	PA0552, PA0553
385	1	622760	622852	623193	+	PA14_07210	92		hypothetical protein	PA0554
386	1	623239	623313	624377	+	PA14_07230	74		fructose-1,6-bisphosphate aldolase	PA0555
387	1	NA	624443	624925	+	PA14_07240	NA		hypothetical protein	PA0556
388	1	NA	624927	625583	-	PA14_07250	NA		hypothetical protein	PA0557
389	1	NA	625582	626349	+	PA14_07260	NA		hypothetical protein	PA0558
390	1	627548	626346	627524	-	PA14_07280	24		hypothetical protein	PA0559
391	2	627610	627637	629305	+	PA14_07290, PA14_07300	27		hypothetical protein, hypothetical protein	PA0560, PA0561
392	1	NA	629307	629981	-	PA14_07310	NA		putative hydrolase	PA0562
393	1	630538	630110	630463	-	PA14_07330	75		hypothetical protein	PA0563
394	1	NA	630641	631552	-	PA14_07340	NA		putative transcriptional regulator	PA0564
395	1	631629	631670	632008	+	PA14_07355	41		hypothetical protein	PA0565
396	1	NA	631998	632513	-	PA14_07360	NA		hypothetical protein	PA0566
397	1	632634	632701	632859	+	PA14_07370	67		hypothetical protein	PA0567
398	4	NA	632869	634778	-	PA14_07380, PA14_07400, PA14_07410, PA14_07420	NA		hypothetical protein, hypothetical protein, hypothetical protein, hypothetical protein	PA0568, PA0569, PA0570, PA0571
399	1	637867	634969	637740	-	PA14_07430	127		hypothetical protein	PA0572
400	2	639867	638309	639858	-	PA14_07440, PA14_07450	9		hypothetical protein, hypothetical protein	PA0573, PA0574
401	1	640308	640117	640278	-	PA14_07460	30		NA	NA
402	1	640639	640410	640483	-	PA14_07470	156		NA	NA
403	1	NA	640581	642266	-	PA14_07480	NA		NA	NA
404	1	NA	643347	647084	-	PA14_07500	NA		hypothetical protein	PA0575
405	1	649192	647191	649044	-	PA14_07520	148		RNA polymerase sigma	PA0576
406	1	651151	649124	651118	-	PA14_07530	33		DNA primase	PA0577
407	1	NA	651201	651650	-	PA14_07550	NA		hypothetical protein	PA0578
408	1	652010	651720	651935	-	PA14_07560	75		30S ribosomal protein	PA0579
409	1	NA	652136	653161	+	PA14_07570	NA		O-sialoglycoprotein endopeptidase	PA0580
410	1	653831	653240	653809	-	PA14_07580	22		putative glycerol-3-phosphate acyltransferase	PA0581
411	2	NA	653893	654779	+	PA14_07590, PA14_07600	NA		dihydroneopterin aldolase, putative	PA0582, PA0583
412	2	656700	654752	656534	-	PA14_07620, PA14_07630	166		ion of Pi,, hypothetical protein	PA0584, PA0585
413	1	658202	656629	658182	-	PA14_07650	20		SpoVR family protein	PA0586
414	1	NA	658179	659450	-	PA14_07660	NA		hypothetical protein	PA0587
415	1	661666	659551	661473	-	PA14_07680	193		hypothetical protein	PA0588
416	1	662395	661752	662084	-	PA14_07690	311		thiosulfate sulfurtransferase	PA0589
417	2	663386	662128	663359	-	PA14_07700, PA14_07710	27		diadenosine tetraphosphatase, ApaG	PA0590, PA0591
418	1	NA	663396	664202	-	PA14_07730	NA		dimethyladenosine transferase	PA0592
419	1	665335	664318	665304	-	PA14_07740	31		NA	NA
420	2	669418	665301	669348	-	PA14_07760, PA14_07770	70		peptidyl-prolyl cis-trans isomerase, organic solvent tolerance	PA0594, PA0595
421	3	669435	669475	671922	+	PA14_07780, PA14_07790, PA14_07800	40		hypothetical protein, putative nucleotidyl transferase, hypothetical protein	PA0596, PA0597, PA0598
422	1	673008	671923	672984	-	PA14_07810	24		hypothetical protein	PA0599
423	1	NA	673136	675529	+	PA14_07820	NA		putative histidine kinase	PA0600
424	1	NA	675575	676207	+	PA14_07840	NA		putative two-component response	PA0601
425	1	NA	676336	677370	+	PA14_07850	NA		putative binding protein	PA0602
426	1	677572	677604	678713	+	PA14_07860	32		putative ATP-binding component	PA0603
427	1	678581	678769	679815	+	PA14_07870	188		putative binding protein	PA0604
428	2	NA	679930	682113	+	PA14_07890, PA14_07900	NA		putative permease of, putative permease of	PA0605, PA0606
429	2	682210	682237	683729	+	PA14_07910, PA14_07930	27		ribulose-phosphate 3-epimerase, phosphoglycolate phosphatase	PA0607, PA0608
430	1	683626	683802	685280	+	PA14_07940	176		anthranilate synthase component	PA0609
431	1	685810	685467	685781	-	PA14_07950	29		transcriptional regulator PrtN	PA0610
432	1	686651	685881	686651	-	PA14_07960	0		transcriptional regulator PrtR	PA0611
433	10	686787	686793	694041	+	PA14_NovelOrf_023, PA14_07970, PA14_07980, PA14_07990, PA14_08000, PA14_08010, PA14_08020, PA14_08030, PA14_08040, PA14_08050, PA14_08060	6		Novel protein, hypothetical protein, hypothetical protein, hypothetical protein, hypothetical protein, hypothetical protein, putative bacteriophage protein, putative phage baseplate, putative phage tail, putative tail fiber, putative tail fiber	NA, PA0612, PA0613, PA0614, PA0615, PA0616, PA0617, PA0618, PA0619, PA0620, PA0621
434	4	693990	694084	696198	+	PA14_08070, PA14_08090, PA14_08100, PA14_08110	94		putative phage tail, putative phage tail, hypothetical protein, NA	PA0622, PA0623, PA0624, NA
435	3	696217	696289	699589	+	PA14_08120, PA14_08130, PA14_08140	72		putative tail length, hypothetical protein, hypothetical protein	PA0625, PA0626, PA0627
436	5	NA	699647	702213	+	PA14_08150, PA14_08160, PA14_08180, PA14_08190, PA14_08200	NA		putative phage late, putative lytic enzyme, hypothetical protein, hypothetical protein, hypothetical protein	PA0628, PA0629, PA0630, PA0631, PA0632
437	9	NA	702227	711431	+	PA14_08210, PA14_08220, PA14_08230, PA14_08240, PA14_08250, PA14_08260, PA14_08270, PA14_08280, PA14_08300	NA		hypothetical protein, hypothetical protein, hypothetical protein, hypothetical protein, hypothetical protein, putative minor tail, hypothetical protein, putative bacteriophage protein, putative phage-related protein,	PA0633, PA0634, PA0635, PA0636, PA0637, PA0638, PA0639, PA0640, PA0641
438	2	712253	712461	713815	+	PA14_08310, PA14_08320	208		hypothetical protein, hypothetical protein	PA0646, PA0647
439	1	713711	713812	714042	+	PA14_08330	101		hypothetical protein	PA0648
440	3	714200	714461	716950	+	PA14_08340, PA14_08350, PA14_08360	261		anthranilate synthase component, anthranilate phosphoribosyltransferase, indole-3-glycerol-phosphate synthase	PA0649, PA0650, PA0651
441	1	717799	717012	717656	-	PA14_08370	143		cAMP-regulatory protein	PA0652
442	1	NA	717928	718350	+	PA14_08380	NA		hypothetical protein	PA0653
443	1	718549	718670	719464	+	PA14_08390	121		S-adenosylmethionine decarboxylase	PA0654
444	1	720190	719519	720166	-	PA14_08400	24		hypothetical protein	PA0655
445	1	720630	720266	720604	-	PA14_08420	26		putative HIT family	PA0656
446	1	NA	720683	722164	+	PA14_08430	NA		putative ATPase	PA0657
447	1	723159	722204	723004	-	PA14_08440	155		putative short chain	PA0658
448	1	724183	723065	724147	-	PA14_08450	36		hypothetical protein	PA0659
449	2	725699	724269	725676	-	PA14_08460, PA14_08470	23		hypothetical protein, hypothetical protein	PA0660, PA0661
450	3	725925	725967	728143	+	PA14_08480, PA14_08490, PA14_08500	42		N-acetyl-gamma-glutamyl-phosphate reductase, hypothetical protein, hypothetical protein	PA0662, PA0663, PA0664
451	1	728180	728221	728571	+	PA14_08510	41		iron-sulfur cluster insertion	PA0665
452	2	731281	728625	731062	-	PA14_08520, PA14_08540	219		anhydro-N-acetylmuramic acid kinase, hypothetical protein	PA0666, PA0667
453	1	731313	731347	732546	+	PA14_08560	34		tyrosyl-tRNA synthetase	PA0668
454	1	732978	733095	734620	+	PA14_08570	117		NA	NA
455	1	NA	734686	734759	+	PA14_08580	NA		NA	NA
456	1	NA	734791	734863	+	PA14_08590	NA		NA	NA
457	1	NA	735093	737983	+	PA14_08600	NA		NA	NA
458	1	NA	738120	738251	+	PA14_08610	NA		NA	NA
459	3	738385	738405	740799	+	PA14_08620, PA14_08630, PA14_08640	20		biotin--protein ligase, pantothenate kinase, hypothetical protein	PA4280, PA4279, PA4278
460	3	740947	740947	741223	+	PA14_08650, PA14_08660, PA14_08670	0		tRNA-tyr, tRNA-gly, tRNA-thr	NA, NA, NA
461	1	741228	741311	742504	+	PA14_08680	83		NA	NA
462	1	742546	742560	742632	+	PA14_08690	14		NA	NA
463	2	742598	742681	743592	+	PA14_08695, PA14_08710	83		preprotein translocase subunit, transcription antitermination protein	PA4276, PA4275
464	2	743603	743709	744835	+	PA14_08720, PA14_08730	106		50S ribosomal protein, 50S ribosomal protein	PA4274, PA4273
465	1	744873	745034	745534	+	PA14_08740	161		50S ribosomal protein	PA4272
466	1	745561	745613	745981	+	PA14_08750	52		50S ribosomal protein	PA4271
467	2	746143	746203	754541	+	PA14_08760, PA14_08780	60		DNA-directed RNA polymerase, DNA-directed RNA polymerase	PA4270, PA4269
468	3	754621	754693	757785	+	PA14_08790, PA14_08810, PA14_08820	72		30S ribosomal protein, 30S ribosomal protein, elongation factor G	PA4268, PA4267, PA4266
469	1	757776	757816	759009	+	PA14_08830	40		elongation factor Tu	PA4277
470	15	759109	759165	765757	+	PA14_08840, PA14_08850, PA14_08860, PA14_08870, PA14_08880, PA14_08890, PA14_08900, PA14_08910, PA14_08920, PA14_08930, PA14_08940, PA14_08950, PA14_08960, PA14_08970, PA14_08980	56		Ribosomal protein operon	PA4264, PA4263, PA4262, PA4261, PA4260, PA4259, PA4258, PA4257, PA4256, PA4255, PA4254, PA4253, PA4252, PA4251, PA4250
471	2	765859	765947	766884	+	PA14_08990, PA14_09000	88		30S ribosomal protein, 50S ribosomal protein	PA4249, PA4248
472	6	766571	766895	769840	+	PA14_09010, PA14_09020, PA14_09030, PA14_09040, PA14_09050, PA14_09070	324		Ribosomal protein operon	PA4247, PA4246, PA4245, PA4244, PA4243, NA
473	5	769921	769971	772829	+	PA14_09080, PA14_09090, PA14_09100, PA14_09115, PA14_09130	50		Ribosomal protein operon	PA4241, PA4240, PA4239, PA4238, PA4237
474	1	773077	773110	774558	+	PA14_09150	33		catalase	PA4236
475	1	774665	774689	775153	+	PA14_09160	24		bacterioferritin	PA4235
476	1	NA	775225	778062	-	PA14_09180	NA		excinuclease ABC subunit	PA4234
477	1	NA	778276	779664	+	PA14_09195	NA		major facilitator transporter	PA4233
478	1	779600	779681	780178	+	PA14_09200	81		single-stranded DNA-binding protein	PA4232
479	2	782086	780267	781999	-	PA14_09210, PA14_09220	87		salicylate biosynthesis isochorismate, isochorismate-pyruvate lyase	PA4231, PA4230
480	2	784438	781999	784394	-	PA14_09230, PA14_09240	44		pyochelin biosynthetic protein, pyochelin biosynthesis protein	PA4229, PA4228
481	1	784573	784624	785514	+	PA14_09260	51		transcriptional regulator PchR	PA4227
482	5	785651	785708	799926	+	PA14_09270, PA14_09280, PA14_09290, PA14_09300, PA14_09320	57		dihydroaeruginoic acid synthetase, pyochelin synthetase, pyochelin biosynthetic protein, putative ATP-binding component, putative ATP-binding component	PA4226, PA4225, PA4224, PA4223, PA4222
483	3	799981	800018	803968	+	PA14_09340, PA14_09350, PA14_09370	37		Fe(III)-pyochelin outer membrane, hypothetical protein, hypothetical protein	PA4221, PA4220, PA4219
484	1	803870	803961	805205	+	PA14_09380	91		putative transporter	PA4218
485	1	806546	805310	806518	-	PA14_09400	28		hypothetical protein	PA4217
486	6	812646	806856	812617	-	PA14_09410, PA14_09420, PA14_09440, PA14_09450, PA14_09460, PA14_09470	29		pyrodoxamine 5'-phosphate oxidase, NA, phenazine biosynthesis protein, phenazine biosynthesis protein, phenazine biosynthesis protein, phenazine biosynthesis protein	PA1905, NA, PA4214, PA4213, PA4212, PA4211
487	1	813471	812647	813135	-	PA14_09480	336		phenazine biosynthesis protein	PA4210
488	1	813562	813831	814835	+	PA14_09490	269		putative phenazine-specific methyltransferase	PA4209
489	4	NA	814846	820974	-	PA14_09500, PA14_09520, PA14_09530, PA14_09540	NA		outer membrane protein, RND efflux transporter, RND efflux membrane, hypothetical protein	PA4208, PA4207, PA4206, PA4205
490	1	822825	821625	822791	-	PA14_09550	34		hypothetical protein	PA4204
491	1	NA	822871	823725	-	PA14_09570	NA		LysR family transcriptional	PA4203
492	1	NA	823833	824888	+	PA14_09580	NA		hypothetical protein	PA4202
493	1	824961	824984	826024	+	PA14_09600	23		D-alanine-D-alanine ligase A	PA4201
494	1	827143	826064	826930	-	PA14_09610	213		hypothetical protein	PA4200
495	2	830809	827138	830659	-	PA14_09630, PA14_09660	150		putative acyl-CoA dehydrogenase, acyl-CoA synthetase	PA4199, PA4198
496	2	NA	830905	833828	+	PA14_09680, PA14_09690	NA		putative two-component sensor, putative two-component response	PA4197, PA4196
497	1	NA	833833	835038	-	PA14_09700	NA		putative monooxygenase	PA4190
498	2	NA	835206	837600	-	PA14_09710, PA14_09730	NA		putative aldehyde dehydrogenase, putative dihydrodipicolinate synthase	PA4189, PA4188
499	1	NA	837665	838993	-	PA14_09740	NA		putative MFS transporter	PA4187
500	1	NA	839129	840448	-	PA14_09750	NA		putative oxidoreductase	PA4186
501	1	NA	840542	841270	-	PA14_09760	NA		GntR family transcriptional	PA4185
502	2	NA	841579	843094	+	PA14_09770, PA14_09780	NA		AraC family transcriptional, hypothetical protein	PA4184, PA4183
503	2	844550	843098	844483	-	PA14_09790, PA14_09810	67		putative transcriptional regulator, hypothetical protein	PA4182, PA4181
504	1	NA	844784	846427	+	PA14_09820	NA		acetolactate synthase	PA4180
505	1	NA	846470	847765	-	PA14_09850	NA		putative porin	PA4179
506	1	NA	848003	848746	-	PA14_09870	NA		hypothetical protein	PA4178
507	1	NA	848846	849247	-	PA14_09880	NA		hypothetical protein	PA4177
508	1	849366	849390	849671	+	PA14_09890	24		peptidyl-prolyl cis-trans isomerase	PA4176
509	1	851427	849992	851380	-	PA14_09900	47		Pvds-regulated endoprotease, lysyl	PA4175
510	1	NA	851913	852836	-	PA14_09910	NA		putative transcriptional regulator	PA4174
511	1	NA	852977	853375	+	PA14_09920	NA		putative translation initiation	PA4173
512	2	NA	853407	854793	-	PA14_09930, PA14_09940	NA		putative exonuclease III, putative protease	PA4172, PA4171
513	1	NA	854929	855861	-	PA14_09950	NA		putative oxidoreductase	PA4170
514	1	NA	855942	856370	+	PA14_09960	NA		hypothetical protein	PA4169
515	1	NA	856435	858843	-	PA14_09970	NA		type I ferripyoverdine	PA4168
516	1	NA	859186	860004	+	PA14_09980	NA		2,5-diketo-D-gluconate reductase B	PA4167
517	1	NA	860054	860512	-	PA14_09990	NA		putative acetyltransferase	PA4166
518	1	NA	860644	862134	+	PA14_10010	NA		putative transcriptional regulator	PA4165
519	1	NA	862150	862476	-	PA14_10020	NA		hypothetical protein	PA4164
520	1	NA	862538	864247	-	PA14_10040	NA		amidase	PA4163
521	3	NA	864434	866321	-	PA14_10050, PA14_10070, PA14_10080	NA		NA, NA, NA	NA, NA, NA
522	1	NA	866440	867351	+	PA14_10090	NA		NA	NA
523	1	NA	867362	868546	-	PA14_10110	NA		NA	NA
524	1	869715	868642	869571	-	PA14_10120	144		NA	NA
525	1	NA	869711	870427	+	PA14_10130	NA		short chain dehydrogenase	PA4162
526	3	NA	870437	873423	-	PA14_10140, PA14_10160, PA14_10170	NA		ferric enterobactin transport, ferric enterobactin transport, iron-enterobactin transporter periplasmic	PA4161, PA4160, PA4159
527	1	NA	873549	874346	+	PA14_10180	NA		ferric enterobactin transport	PA4158
528	1	NA	874353	875141	-	PA14_10190	NA		putative transcriptional regulator	PA4157
529	1	NA	875397	877481	+	PA14_10200	NA		putative TonB-dependent receptor	PA4156
530	1	NA	877549	878856	+	PA14_10210	NA		putative oxidoreductase	PA4155
531	1	NA	879293	879961	+	PA14_10220	NA		SH3 domain-containing protein	PA4154
532	6	NA	880045	886145	-	PA14_10230, PA14_10240, PA14_10250, PA14_10260, PA14_10270, PA14_10280	NA		2,3-butanediol dehydrogenase, branched-chain alpha-keto acid, acetoin catabolism protein, putative dehydrogenase E1, hypothetical protein, putative short-chain dehydrogenase	PA4153, PA4152, PA4151, PA4150, PA4149, PA4148
533	1	886445	886477	888354	+	PA14_10290	32		transcriptional regulator AcoR	PA4147
534	1	NA	888559	889170	+	PA14_10300	NA		NA	NA
535	1	NA	889157	890047	-	PA14_10320	NA		putative transcriptional regulator	PA4145
536	3	NA	890143	894983	-	PA14_10330, PA14_10340, PA14_10350	NA		putative outer membrane, putative toxin transporter, putative secretion protein	PA4144, PA4143, PA4142
537	1	895490	895080	895379	-	PA14_10360	111		hypothetical protein	PA4141
538	1	NA	895688	897481	-	PA14_10370	NA		hypothetical protein	PA4140
539	1	898035	897613	897912	-	PA14_10380	123		hypothetical protein	PA4139
540	2	NA	898045	898562	-	PA14_10400, PA14_10410	NA		NA, NA	NA, NA
541	1	NA	898671	899909	+	PA14_10420	NA		tyrosyl-tRNA synthetase	PA4138
542	1	NA	899938	901194	-	PA14_10440	NA		putative porin	PA4137
543	1	NA	901559	902767	+	PA14_10470	NA		putative MFS transporter	PA4136
544	1	902821	902853	903275	+	PA14_10480	32		putative transcriptional regulator	PA4135
545	2	905113	903291	905044	-	PA14_10490, PA14_10500	69		hypothetical protein, cytochrome c oxidase	PA4134, PA4133
546	2	908280	905308	908266	-	PA14_10530, PA14_10540	14	Annotation of ORF corrected by 5' end sequencing (original ORF: 906821..908542)	GntR family transcriptional, putative iron-sulfur cluster-binding	PA4132, PA4131
547	2	908534	908648	910806	+	PA14_10550, PA14_10560	114		putative sulfite or, hypothetical protein	PA4130, PA4129
548	3	NA	910888	913832	-	PA14_10570, PA14_10590, PA14_10600	NA		putative 2,4-dihydroxyhept-2-ene-1,7-dioic acid, 2-oxo-hept-3-ene-1,7-dioate hydratase, putative MFS transporter	PA4128, PA4127, PA4126
549	2	NA	913925	915251	-	PA14_10610, PA14_10620	NA		5-carboxymethyl-2-hydroxymuconate isomerase, homoprotocatechuate 2,3-dioxygenase	PA4125, PA4124
550	3	NA	915383	918289	-	PA14_10630, PA14_10640, PA14_10650	NA		5-carboxy-2-hydroxymuconate semialdehyde, hypothetical protein, hypothetical protein	PA4123, PA4122, PA4121
551	1	NA	918509	919420	+	PA14_10660	NA		putative transcriptional regulator	PA4120
552	1	NA	919472	920275	+	PA14_10670	NA		aminoglycoside 3'-phosphotransferase type	PA4119
553	1	NA	920399	920968	-	PA14_10680	NA		hypothetical protein	PA4118
554	1	NA	921046	923232	-	PA14_10700	NA		putative bacteriophytochrome	PA4117
555	1	923876	923260	923847	-	PA14_10710	29		hypothetical protein	PA4116
556	1	925503	923965	925350	-	PA14_10730	153		hypothetical protein	PA4115
557	1	925661	925770	926279	+	PA14_10740	109		spermidine acetyltransferase	PA4114
558	1	926289	926433	927623	+	PA14_10750	144		sugar efflux transporter	PA4113
559	1	927688	927751	932004	+	PA14_10770	63		putative sensor/response regulator	PA4112
560	1	NA	932168	932566	-	PA14_10780	NA		hypothetical protein	PA4111
561	1	NA	932631	933824	-	PA14_10790	NA		beta-lactamase	PA4110
562	1	NA	933973	934863	+	PA14_10800	NA		transcriptional regulator AmpR	PA4109
563	1	935294	934960	935266	-	PA14_NovelOrf_004	28	TU contains unannotated ORF	Unannotated ORF	PA14_NovelOrf_004
564	1	NA	935422	936666	-	PA14_10820	NA		HDIG domain-containing protein	PA4108
565	1	NA	936949	937824	-	PA14_10830	NA		NA	NA
566	1	NA	937983	938735	+	PA14_10840	NA		NA	NA
567	1	NA	938752	940431	-	PA14_10850	NA		putative dehydrogenase	PA4100
568	1	NA	940586	941890	-	PA14_10870	NA		hypothetical protein	PA4099
569	3	NA	941975	945029	-	PA14_10890, PA14_10900, PA14_10910	NA		putative short-chain dehydrogenase, putative alcohol dehydrogenase, major facilitator transporter	PA4098, PA4097, PA4096
570	1	NA	945100	945633	-	PA14_10920	NA		hypothetical protein	PA4095
571	1	NA	945954	946913	+	PA14_10940	NA		AraC family transcriptional	PA4094
572	1	NA	946961	947377	+	PA14_10950	NA		hypothetical protein	PA4093
573	2	NA	947387	949493	-	PA14_10960, PA14_10970	NA		NA, NA	NA, NA
574	1	NA	949604	950458	+	PA14_10980	NA		NA	NA
575	2	NA	950502	952606	-	PA14_10990, PA14_11000	NA		4-hydroxyphenylacetate 3-monooxygenase small, 4-hydroxyphenylacetate 3-monooxygenase large	PA4092, PA4091
576	1	953087	952772	953062	-	PA14_11010	25		hypothetical protein	PA4090
577	3	NA	953365	956341	-	PA14_11020, PA14_11030, PA14_11050	NA		3-ketoacyl-(acyl-carrier-protein) reductase, aminotransferase, hypothetical protein	PA4089, PA4088, PA4087
578	2	NA	956812	958158	+	PA14_11060, PA14_11070	NA		putative fimbrial subunit, chaperone CupB2	PA4086, PA4085
579	2	NA	958480	961751	+	PA14_11080, PA14_11090	NA		usher CupB3, chaperone CupB4	PA4084, PA4083
580	1	NA	961839	964895	+	PA14_11100	NA		adhesive protein CupB5	PA4082
581	1	NA	964995	966140	+	PA14_11110	NA		fimbrial protein cupB6	PA4081
582	1	966594	966785	967429	+	PA14_11120	191		putative response regulator	PA4080
583	1	NA	967444	968133	-	PA14_11130	NA		short chain dehydrogenase	PA4079
584	1	NA	968223	971198	-	PA14_11140	NA		putative nonribosomal peptide	PA4078
585	2	NA	971409	971986	-	PA14_11150, PA14_11160	NA		putative transcriptional regulator, hypothetical protein	PA4077, PA4076
586	1	NA	972093	972929	+	PA14_11170	NA		hypothetical protein	PA4075
587	1	NA	972926	973594	-	PA14_11180	NA		putative transcriptional regulator	PA4074
588	1	NA	973823	975310	+	PA14_11190	NA		putative aldehyde dehydrogenase	PA4073
589	2	NA	975501	977544	+	PA14_11210, PA14_11230	NA		putative amino acid, hypothetical protein	PA4072, PA4071
590	1	NA	977705	978655	+	PA14_11240	NA		DNA-binding transcriptional activator	PA4070
591	2	978758	978924	980730	+	PA14_11250, PA14_11260	166		hypothetical protein, putative epimerase	PA4069, PA4068
592	1	981904	981171	981869	-	PA14_11270	35		outer membrane protein	PA4067
593	3	984671	982017	984525	-	PA14_11280, PA14_11290, PA14_11310	146		hypothetical protein, putative permease, ABC transporter ATP-binding	PA4066, PA4065, PA4064
594	1	NA	984614	985204	-	PA14_11320	NA		hypothetical protein	PA4063
595	1	985316	985337	985681	+	PA14_11330	21		hypothetical protein	PA4062
596	1	NA	985718	986587	-	PA14_11340	NA		putative thioredoxin	PA4061
597	2	NA	986659	987788	-	PA14_11350, PA14_11370	NA		NA, putative lipoprotein	NA, PA4058
598	1	987947	987974	988438	+	PA14_11380	27		transcriptional regulator NrdR	PA4057
599	1	988390	988435	989556	+	PA14_11400	45		riboflavin-specific deaminase/reductase	PA4056
600	2	NA	989984	991767	+	PA14_11410, PA14_11420	NA	The 5' UTR contains a FMN riboswitch (RF00050)	riboflavin synthase subunit, bifunctional 3,4-dihydroxy-2-butanone	PA4055, PA4054
601	6	991833	991885	995734	+	PA14_11430, PA14_11450, PA14_11460, PA14_11470, PA14_11480, PA14_11490	52		NA, transcription antitermination protein, thiamine monophosphate kinase, phosphatidylglycerophosphatase A, hypothetical protein, hypothetical protein	NA, PA4052, PA4051, PA4050, PA4049, PA4048
602	3	995839	995865	997695	+	PA14_11510, PA14_11520, PA14_11530	26		GTP cyclohydrolase II, hypothetical protein, hypothetical protein	PA4047, PA4046, PA4045
603	1	999729	997819	999702	-	PA14_11550	27		1-deoxy-D-xylulose-5-phosphate synthase	PA4044
604	2	1000966	999811	1000937	-	PA14_11560, PA14_11570	29		geranyltranstransferase, exodeoxyribonuclease VII small	PA4043, PA4042
605	1	1001067	1001095	1002264	+	PA14_11580	28		hypothetical protein	PA4041
606	4	NA	1002496	1006974	-	PA14_11590, PA14_11600, PA14_11610, PA14_11620	NA		hypothetical protein, ABC transporter, ABC transporter permease, ABC transporter	PA4040, PA4039, PA4038, PA4037
607	2	1010744	1007379	1010699	-	PA14_11630, PA14_11650	45		putative two-component sensor, hypothetical protein	PA4036, PA4035
608	1	1011803	1010865	1011554	-	PA14_11660	249		aquaporin Z	PA4034
609	1	NA	1011901	1012170	-	PA14_11670	NA		hypothetical protein	PA4033
610	1	1012295	1012365	1013081	+	PA14_11680	70		two-component regulator	PA4032
611	1	1013732	1013172	1013699	-	PA14_11690	33		inorganic pyrophosphatase	PA4031
612	2	1015439	1013779	1015277	-	PA14_11700, PA14_11720	162		hypothetical protein, hypothetical protein	PA4030, PA4029
613	1	NA	1015471	1017054	+	PA14_11730	NA		NA	NA
614	1	NA	1016947	1017840	-	PA14_11740	NA		hypothetical protein	PA4027
615	4	NA	1017890	1022248	-	PA14_11750, PA14_11760, PA14_11770, PA14_11790	NA		acetyltransferase, ethanolamine ammonia-lyase small, ethanolamine ammonia-lyase large, putative amino acid	PA4026, PA4025, PA4024, PA4023
616	1	1024031	1022458	1023978	-	PA14_11810	53		putative aldehyde dehydrogenase	PA4022
617	1	1024239	1024317	1026248	+	PA14_11830	78		transcriptional regulator	PA4021
618	3	1026366	1026406	1028676	+	PA14_11845, PA14_11860, PA14_11880	40		UDP-N-acetylmuramate:L-alanyl-gamma-D-glutamyl-, aromatic acid decarboxylase, hypothetical protein	PA4020, PA4019, PA4018
619	1	1029357	1028696	1029337	-	PA14_11890	20		hypothetical protein	PA4017
620	1	1031144	1029384	1031123	-	PA14_11900	21		hypothetical protein	PA4016
621	1	1031804	1031314	1031769	-	PA14_11910	35		hypothetical protein	PA4015
622	3	NA	1031915	1033648	+	PA14_11920, PA14_11930, PA14_11940	NA		hypothetical protein, hypothetical protein, hypothetical protein	PA4014, PA4013, PA4012
623	2	NA	1033659	1035688	-	PA14_11960, PA14_11970	NA		hypothetical protein, 3-methyladenine DNA glycosylase	PA4011, PA4010
624	1	1035730	1035752	1036609	+	PA14_11980	22		hypothetical protein	PA4009
625	1	NA	1036617	1037840	-	PA14_11990	NA		putative hydrolase	PA4008
626	2	NA	1038138	1040047	+	PA14_12010, PA14_12020	NA		gamma-glutamyl phosphate reductase, nicotinic acid mononucleotide	PA4007, PA4006
627	4	1040007	1040070	1043989	+	PA14_12030, PA14_12050, PA14_12060, PA14_12070	63		hypothetical protein, rRNA large subunit, penicillin-binding protein 2, rod shape-determining protein	PA4005, PA4004, PA4003, PA4002
628	2	1043860	1043998	1046042	+	PA14_12080, PA14_12090	138		soluble lytic transglycosylase, RlpA family lipoprotein	PA4001, PA4000
629	1	1046062	1046108	1047268	+	PA14_12100	46		D-ala-D-ala-carboxypeptidase	PA3999
630	2	1047244	1047339	1048273	+	PA14_12110, PA14_12120	95		hypothetical protein, lipoyltransferase	PA3998, PA3997
631	1	1048237	1048270	1049253	+	PA14_12130	33		lipoyl synthase	PA3996
632	1	1050314	1049398	1050291	-	PA14_12140	23		putative transcriptional regulator	PA3995
633	1	NA	1050399	1051289	+	PA14_12150	NA		epoxide hydrolase	PA3994
634	1	1052864	1051492	1052838	-	PA14_12160	26		putative murein transglycosylase	PA3992
635	1	NA	1053067	1053285	+	PA14_12170	NA		NA	NA
636	1	NA	1053401	1053553	-	PA14_12180	NA		hypothetical protein	PA3990
637	3	1058060	1053645	1058031	-	PA14_12200, PA14_12210, PA14_12230	29		DNA polymerase III, hypothetical protein, s; in	PA3989, PA3988, PA3987
638	1	1058154	1058202	1058633	+	PA14_12260	48		hypothetical protein	PA3986
639	1	NA	1058706	1059467	+	PA14_12270	NA		hypothetical protein	PA3985
640	1	NA	1059517	1061052	-	PA14_12280	NA		apolipoprotein N-acyltransferase	PA3984
641	3	1063602	1061238	1063568	-	PA14_12300, PA14_12310, PA14_12330	34		hypothetical protein, putative metalloprotease, hypothetical protein	PA3983, PA3982, PA3981
642	1	1065104	1063737	1065077	-	PA14_12350	27		hypothetical protein	PA3980
643	1	NA	1065206	1065538	+	PA14_12360	NA		hypothetical protein	PA3979
644	1	1066165	1065554	1066102	-	PA14_12370	63		hypothetical protein	PA3978
645	1	1067646	1066311	1067594	-	PA14_12390	52		glutamate-1-semialdehyde aminotransferase	PA3977
646	2	1069069	1067632	1069069	-	PA14_12400, PA14_12410	0		thiamine-phosphate pyrophosphorylase, phosphomethylpyrimidine kinase	PA3976, PA3975
647	2	1069197	1069280	1071716	+	PA14_12420, PA14_12430	83		NA, NA	NA, NA
648	3	NA	1071822	1074558	+	PA14_12440, PA14_12450, PA14_12470	NA		AcrR family transcriptional, putative acyl-CoA dehydrogenase, hypothetical protein	PA3973, PA3972, PA3971
649	1	1074613	1074613	1076112	+	PA14_12490	0		AMP nucleosidase	PA3970
650	1	1077898	1076787	1077872	-	PA14_12530	26		hypothetical protein	PA3969
651	1	1077922	1078011	1078580	+	PA14_12540	89		putative pseudouridine synthase	PA3968
652	1	1079072	1078614	1079006	-	PA14_12550	66		hypothetical protein	PA3967
653	1	1079460	1079107	1079316	-	PA14_12560	144		hypothetical protein	PA3966
654	1	1080071	1079518	1080027	-	PA14_12570	44		transcription regulator AsnC	PA3965
655	2	NA	1080409	1082047	-	PA14_12590, PA14_12610	NA		hypothetical protein, putative transporter	PA3964, PA3963
656	1	1082576	1082136	1082552	-	PA14_12620	24		hypothetical protein	PA3962
657	1	NA	1082719	1085211	+	PA14_12630	NA		putative ATP-dependent helicase	PA3961
658	2	1086422	1085222	1086387	-	PA14_12640, PA14_12650	35		hypothetical protein, hypothetical protein	PA3960, PA3959
659	1	1087586	1086477	1087562	-	PA14_12670	24	Annotation of ORF corrected by 5' end sequencing (original ORF: 1086477..1087616)	hypothetical protein	PA3958
660	1	1087588	1087678	1088514	+	PA14_12680	90		short chain dehydrogenase	PA3957
661	1	1088977	1088521	1088955	-	PA14_12690	22		hypothetical protein	PA3956
662	1	1089702	1089022	1089678	-	PA14_12700	24		hypothetical protein	PA3955
663	1	NA	1089762	1090856	-	PA14_12710	NA		hypothetical protein	PA3954
664	1	NA	1091014	1091595	-	PA14_12730	NA		hypothetical protein	PA3953
665	2	NA	1091836	1092980	+	PA14_12740, PA14_12750	NA		hypothetical protein, hypothetical protein	PA3952, PA3951
666	1	1093035	1093058	1094407	+	PA14_12760	23		ATP-dependent RNA helicase	PA3950
667	1	1095701	1094430	1095605	-	PA14_12770	96		hypothetical protein	PA3949
668	1	1096737	1095964	1096593	-	PA14_12780	144		putative two-component response	PA3948
669	2	NA	1096875	1101793	+	PA14_12810, PA14_12820	NA		two-component response regulator, two-component sensor	PA3947, PA3946
670	1	1101890	1102008	1102598	+	PA14_12840	118		acetyltransferase	PA3945
671	4	1102564	1102625	1106297	+	PA14_12850, PA14_12860, PA14_12870, PA14_12890	61		acetyltransferase, hypothetical protein, acyl-CoA thioesterase II, hypothetical protein	PA3944, PA3943, PA3942, PA3941
672	1	1106859	1106421	1106702	-	PA14_12900	157		putative DNA binding	PA3940
673	1	NA	1107072	1107251	+	PA14_12910	NA		NA	NA
674	1	NA	1107458	1108471	+	PA14_12920	NA		taurine ABC transporter	PA3938
675	3	NA	1108535	1111074	+	PA14_12940, PA14_12960, PA14_12970	NA		taurine ABC transporter, taurine ABC transporter, taurine dioxygenase	PA3937, PA3936, PA3935
676	1	1111210	1111237	1113273	+	PA14_12980	27		hypothetical protein	PA3934
677	1	1115430	1113381	1115342	-	PA14_12990	88		choline transporter	PA3933
678	2	1117540	1115532	1117461	-	PA14_13000, PA14_13010	79		transcriptional regulator, hypothetical protein	PA3932, PA3931
679	3	1117821	1117899	1120560	+	PA14_13030, PA14_13040, PA14_13050	78		CioA, cyanide insensitive, CioB, cyanide insensitive, hypothetical protein	PA3930, PA3929, PA3928
680	1	NA	1120835	1121623	-	PA14_13060	NA		putative transcriptional regulator	PA3927
681	1	NA	1121725	1122906	+	PA14_13070	NA		MFS family transporter	PA3926
682	1	1124181	1122963	1124138	-	PA14_13090	43		putative acyl-CoA thiolase	PA3925
683	1	1124284	1124320	1126002	+	PA14_13110	36		acyl-CoA synthetase	PA3924
684	1	1126180	1126214	1128139	+	PA14_13130	34		hypothetical protein	PA3923
685	1	1128178	1128200	1129567	+	PA14_13140	22		hypothetical protein	PA3922
686	1	1129783	1129901	1132621	+	PA14_13150	118		putative transcriptional regulator	PA3921
687	1	1135094	1132653	1135031	-	PA14_13170	63		putative metal transporting	PA3920
688	2	1135383	1135535	1137819	+	PA14_13190, PA14_13200	152		hypothetical protein, NA	PA3919, NA
689	1	1138060	1137829	1138011	-	PA14_13210	49		NA	NA
690	1	1138629	1138174	1138602	-	PA14_13220	27		NA	NA
691	3	NA	1138820	1140007	+	PA14_13230, PA14_13240, PA14_13250	NA		molybdenum cofactor biosynthesis, molybdopterin converting factor,, molybdopterin converting factor,	PA3918, PA3917, PA3916
692	2	NA	1140109	1141886	+	PA14_13260, PA14_13280	NA		MoaB1, molybdenum cofactor biosynthetic	PA3915, PA3914
693	5	NA	1142001	1148600	+	PA14_13290, PA14_13300, PA14_13320, PA14_13330, PA14_13340	NA		putative protease, hypothetical protein, hypothetical protein, hypothetical protein, extracellular nuclease	PA3913, PA3912, PA3911, PA3910, PA3909
694	5	1151738	1148922	1151715	-	PA14_13350, PA14_13360, PA14_13370, PA14_13380, PA14_13390	23		hypothetical protein, hypothetical protein, hypothetical protein, hypothetical protein, hypothetical protein	PA3908, PA3907, PA3906, PA3905, PA3904
695	1	1153703	1152100	1153683	-	PA14_13410	20		peptide chain release	PA3903
696	1	1153877	1153904	1154365	+	PA14_13420	27		hypothetical protein	PA3902
697	3	NA	1154465	1158373	-	PA14_13430, PA14_13450, PA14_13460	NA		Fe(III) dicitrate transport, putative transmembrane sensor, RNA polymerase sigma	PA3901, PA3900, PA3899
698	1	NA	1158474	1159355	-	PA14_13470	NA		AraC family transcriptional	PA3898
699	1	NA	1159481	1160383	+	PA14_13490	NA		hypothetical protein	PA3897
700	1	NA	1160401	1161378	-	PA14_13500	NA		putative 2-hydroxyacid dehydrogenase	PA3896
701	1	NA	1161473	1162426	-	PA14_13510	NA		LysR family transcriptional	PA3895
702	3	NA	1162672	1167489	+	PA14_13520, PA14_13530, PA14_13560	NA		putative outer membrane, putative outer membrane, hypothetical protein	PA3894, PA3893, PA3892
703	4	1171223	1167617	1171112	-	PA14_13580, PA14_13590, PA14_13600, PA14_13610	111		ABC transporter ATP-binding, ABC transporter permease, putative binding protein, ABC transporter permease	PA3891, PA3890, PA3889, PA3888
704	1	1171451	1171554	1172828	+	PA14_13620	103		Na+/H+ antiporter NhaP	PA3887
705	2	NA	1172887	1174062	-	PA14_13630, PA14_13650	NA		NA, hypothetical protein	NA, PA3886
706	1	NA	1174167	1174823	-	PA14_13660	NA		hypothetical protein	PA3885
707	2	NA	1174918	1176155	-	PA14_13670, PA14_13680	NA		hypothetical protein, short chain dehydrogenase	PA3884, PA3883
708	2	1177497	1176243	1177472	-	PA14_13690, PA14_13710	25		putative methyltransferase, hypothetical protein	PA3882, PA3881
709	1	1178055	1177638	1178033	-	PA14_13720	22		hypothetical protein	PA3880
710	2	1180801	1178118	1180642	-	PA14_13730, PA14_13740	159		transcriptional regulator NarL, two-component sensor NarX	PA3879, PA3878
711	8	NA	1180817	1192296	+	PA14_13750, PA14_13770, PA14_13780, PA14_13800, PA14_13810, PA14_13830, PA14_13840, PA14_13850	NA		nitrite extrusion protein, nitrite extrusion protein, putative respiratory nitrate, respiratory nitrate reductase, respiratory nitrate reductase, respiratory nitrate reductase, putative peptidyl-prolyl cis-trans, NA	PA3877, PA3876, PA3875, PA3874, PA3873, PA3872, PA3871, NA
712	3	1193140	1192303	1193138	-	PA14_13860, PA14_13870, PA14_13880	2		NA, hypothetical protein, NA	NA, PA3869, NA
713	1	1194432	1193191	1194201	-	PA14_13890	231		putative integrase protein	PA3868
714	2	NA	1194757	1195316	-	PA14_13900, PA14_13910	NA		NA, NA	NA, NA
715	1	NA	1195465	1195623	+	PA14_13920	NA		NA	NA
716	1	1195634	1195661	1197924	+	PA14_NovelOrf_005, PA14_13940	27	TU contains unannotated ORF	Unannotated ORF(pyocin protein), putative S-type pyocin	NA, PA3866
717	1	1197666	1197924	1198262	+	PA14_13950	258		NA	NA
718	2	NA	1198334	1198694	-	PA14_13960, PA14_13970	NA		NA, NA	NA, NA
719	1	1199166	1199242	1200033	+	PA14_13990	76		putative amino acid	PA3865
720	1	NA	1200057	1200689	-	PA14_14000	NA		hypothetical protein	PA3864
721	2	1202876	1200752	1202849	-	PA14_14010, PA14_14020	27		putative amino acid, hypothetical protein	PA3863, PA3862
722	1	1204562	1203010	1204533	-	PA14_14040	29		ATP-dependent RNA helicase	PA3861
723	1	1204759	1204817	1206715	+	PA14_14060	58		AMP-binding domain protein	PA3860
724	1	1207416	1206731	1207378	-	PA14_14080	38		carboxylesterase	PA3859
725	1	NA	1207659	1208684	+	PA14_14100	NA		putative amino acid-binding	PA3858
726	1	1208768	1208798	1209514	+	PA14_14110	30		phosphatidylserine synthase	PA3857
727	1	1209565	1209585	1210067	+	PA14_14130	20		hypothetical protein	PA3856
728	1	1210113	1210134	1210835	+	PA14_14140	21		hypothetical protein	PA3855
729	2	1210731	1210828	1211860	+	PA14_14150, PA14_14160	97		GIY-YIG nuclease superfamily, putative acetyltransferase	PA3854, PA3853
730	2	NA	1211981	1213672	+	PA14_14170, PA14_14200	NA		hypothetical protein, hypothetical protein	PA3852, PA3851
731	1	NA	1213761	1214672	+	PA14_14210	NA		hypothetical protein	PA3850
732	1	1215803	1214715	1215719	-	PA14_14220	84		nucleoid-associated protein NdpA	PA3849
733	1	NA	1215812	1217167	-	PA14_14230	NA		hypothetical protein	PA3848
734	1	NA	1217241	1217711	-	PA14_14250	NA		hypothetical protein	PA3847
735	1	1217782	1217815	1218357	+	PA14_14270	33		isochorismatase family hydrolase	PA3846
736	1	1219264	1218347	1219243	-	PA14_14280	21		LysR family transcriptional	PA3845
737	1	NA	1219367	1219978	+	PA14_14290	NA		hypothetical protein	PA3844
738	1	NA	1220135	1221262	-	PA14_14300	NA		NA	NA
739	1	1221495	1221193	1221495	-	PA14_14310	0		NA	NA
740	1	NA	1221589	1222182	+	PA14_14320	NA		NA	NA
741	1	NA	1222474	1222824	-	PA14_14330	NA		chaperone	PA3842
742	1	NA	1223012	1224022	-	PA14_14340	NA		putative SAM-dependent methyltransferase	PA3840
743	1	NA	1224114	1225946	-	PA14_14360	NA		putative sodium:sulfate symporter	PA3839
744	2	NA	1226065	1227752	-	PA14_14370, PA14_14380	NA		putative ABC-transporter ATP-binding, ABC transporter permease	PA3838, PA3837
745	1	1228882	1227836	1228813	-	PA14_14390	69		putative ABC-type transport	PA3836
746	1	NA	1228936	1229070	+	PA14_14400	NA		NA	NA
747	1	NA	1229163	1229642	+	PA14_14420	NA		NA	NA
748	1	NA	1231207	1231584	+	PA14_14430	NA		hypothetical protein	PA3835
749	1	1234481	1231581	1234433	-	PA14_14440	48		valyl-tRNA synthetase	PA3834
750	1	1234956	1234554	1234922	-	PA14_14450	34		hypothetical protein	PA3833
751	2	1237071	1234934	1236846	-	PA14_14460, PA14_14470	225		DNA polymerase III, leucyl aminopeptidase	PA3832, PA3831
752	1	NA	1237183	1237995	+	PA14_14480	NA		putative transcriptional regulator	PA3830
753	1	NA	1238079	1239002	+	PA14_14490	NA		putative hydrolase	PA3829
754	2	1239103	1239195	1241373	+	PA14_14500, PA14_14510	92		hypothetical protein, hypothetical protein	PA3828, PA3827
755	1	NA	1241505	1242002	-	PA14_14520	NA		hypothetical protein	PA3826
756	1	NA	1242132	1243703	+	PA14_14530	NA		hypothetical protein	PA3825
757	2	1243913	1243940	1244495	+	PA14_14540, PA14_14550	27		NA, NA	NA, NA
758	1	1244787	1244524	1244649	-	PA14_14560	138		NA	NA
759	1	1244826	1244743	1244826	-	PA14_14570	0		NA	NA
760	2	1244912	1244929	1247103	+	PA14_14590, PA14_14600	17		S-adenosylmethionine:tRNA, queuine tRNA-ribosyltransferase	PA3824, PA3823
761	1	1247046	1247147	1247485	+	PA14_14610	101		preprotein translocase subunit	PA3822
762	2	NA	1247545	1250338	+	PA14_14630, PA14_14650	NA		preprotein translocase subunit, preprotein translocase subunit	PA3821, PA3820
763	1	1250475	1250522	1251070	+	PA14_14660	47		hypothetical protein	PA3819
764	1	NA	1251175	1251990	-	PA14_14680	NA		extragenic suppressor protein	PA3818
765	2	1252088	1252142	1253691	+	PA14_14690, PA14_14700	54		putative methyltransferase, serine O-acetyltransferase	PA3817, PA3816
766	1	1253725	1253836	1254327	+	PA14_14710	111		putative Rrf2 family	PA3815
767	1	1254304	1254357	1255571	+	PA14_14730	53		cysteine desulfurase	PA3814
768	4	1255525	1255607	1258775	+	PA14_14740, PA14_14750, PA14_14770, PA14_14780	82		scaffold protein, putative iron-binding protein, co-chaperone HscB, chaperone protein HscA	PA3813, PA3812, PA3811, PA3810
769	2	1258764	1258782	1259346	+	PA14_14800, PA14_14810	18		ferredoxin (2Fe-2S), hypothetical protein	PA3809, PA3808
770	8	1259396	1259590	1267236	+	PA14_14820, PA14_14830, PA14_14850, PA14_14860, PA14_14880, PA14_14890, PA14_14900, PA14_14910	194		nucleoside diphosphate kinase, hypothetical protein, type 4 fimbrial, hypothetical protein, NA, histidyl-tRNA synthetase, hypothetical protein, hypothetical protein	PA3807, PA3806, PA3805, PA3804, NA, PA3802, PA3801, PA3800
771	1	1267296	1267314	1268795	+	PA14_14930	18		GTP-binding protein EngA	PA3799
772	2	NA	1269092	1271022	+	PA14_14940, PA14_14960	NA		putative aminotransferase, hypothetical protein	PA3798, PA3797
773	1	NA	1271156	1271743	+	PA14_14975	NA		hypothetical protein	PA3796
774	1	NA	1271832	1272782	-	PA14_14990	NA		putative oxidoreductase	PA3795
775	1	1272898	1272963	1273418	+	PA14_15000	65		hypothetical protein	PA3794
776	1	NA	1273472	1273804	+	PA14_15020	NA		hypothetical protein	PA3793
777	1	1275699	1273874	1275652	-	PA14_15030	47		2-isopropylmalate synthase	PA3792
778	1	1275939	1276025	1276486	+	PA14_15050	86		hypothetical protein	PA3791
779	2	1276380	1276607	1280258	+	PA14_15070, PA14_15080	227		outer membrane copper, hypothetical protein	PA3790, PA3789
780	1	NA	1280276	1280671	-	PA14_15090	NA		hypothetical protein	PA3788
781	1	1281634	1280758	1281606	-	PA14_15100	28		hypothetical protein	PA3787
782	1	1281759	1281778	1282167	+	PA14_15110	19		hypothetical protein	PA3786
783	2	1282095	1282296	1283401	+	PA14_15120, PA14_15130	201		hypothetical protein, hypothetical protein	PA3785, PA3784
784	1	1284086	1283436	1284065	-	PA14_15140	21		hypothetical protein	PA3783
785	1	NA	1284186	1285139	+	PA14_15150	NA		putative transcriptional regulator	PA3782
786	1	NA	1285136	1285843	-	PA14_15160	NA		NA	NA
787	2	NA	1285902	1287673	-	PA14_15180, PA14_15190	NA		putative transporter, hypothetical protein	PA3781, PA3780
788	1	NA	1287746	1288786	-	PA14_15200	NA		hypothetical protein	PA3779
789	2	NA	1288938	1291259	-	PA14_15210, PA14_15230	NA		LysR family transcriptional, exodeoxyribonuclease VII large	PA3778, PA3777
790	1	NA	1291296	1292204	-	PA14_15240	NA		LysR family transcriptional	PA3776
791	1	NA	1292312	1293094	+	PA14_15250	NA		hypothetical protein	PA3775
792	3	NA	1293079	1296317	-	PA14_15260, PA14_15270, PA14_15280	NA		putative acetylpolyamine aminohydrolase, hypothetical protein, hypothetical protein	PA3774, PA3773, PA3772
793	1	NA	1296452	1297429	-	PA14_15290	NA		putative transcriptional regulator	PA3771
794	1	1297663	1297693	1299162	+	PA14_15310	30		inosine 5'-monophosphate dehydrogenase	PA3770
795	1	1299221	1299242	1300819	+	PA14_15340	21		GMP synthase	PA3769
796	1	1300966	1301126	1302328	+	PA14_15350	160		NA	NA
797	1	1303723	1302743	1303723	-	PA14_15360	0		NA	NA
798	1	1303727	1303815	1304061	+	PA14_NovelOrf_006	88	TU contains unannotated ORF	Unannotated ORF	PA14_NovelOrf_006
799	1	NA	1303857	1304084	-	PA14_15370	NA		NA	NA
800	2	NA	1304052	1305789	+	PA14_15380, PA14_15400	NA		NA, NA	NA, NA
801	3	NA	1306031	1306970	-	PA14_15410, PA14_15420, PA14_15430	NA		NA, NA, NA	NA, NA, NA
802	4	NA	1307101	1310388	-	PA14_15435, PA14_15445, PA14_15450, PA14_15460	NA		NA, NA, NA, NA	NA, NA, NA, NA
803	2	1311127	1310460	1311098	-	PA14_15470, PA14_15475	29		NA, NA	NA, NA
804	1	1311145	1311170	1311604	+	PA14_15480	25		NA	NA
805	1	1311707	1311410	1311523	-	PA14_NovelOrf_007	184	TU contains unannotated ORF	Unannotated ORF	PA14_NovelOrf_007
806	2	NA	1311858	1312361	+	PA14_15490, PA14_15500	NA		NA, NA	NA, NA
807	1	NA	1312655	1313026	+	PA14_15510	NA		NA	NA
808	1	1313041	1313291	1314076	+	PA14_15520	250		NA	NA
809	2	NA	1314094	1315988	+	PA14_15530, PA14_15540	NA		NA, NA	NA, NA
810	1	1316887	1316504	1316812	-	PA14_15560	75		NA	NA
811	5	1317102	1317148	1327411	+	PA14_15570, PA14_15580, PA14_15590, PA14_15600, PA14_15610	46		NA, NA, NA, NA, NA	NA, NA, NA, NA, NA
812	2	NA	1328012	1330193	+	PA14_15620, PA14_15630	NA		NA, NA	NA, NA
813	1	NA	1330245	1331201	-	PA14_15650	NA		NA	NA
814	1	NA	1331350	1332345	+	PA14_15660	NA		NA	NA
815	2	NA	1332509	1334439	+	PA14_15670, PA14_15680	NA		putative metallo-oxidoreductase, hypothetical protein	PA3768, PA3767
816	1	NA	1334828	1336084	+	PA14_15700	NA		putative amino acid	PA3766
817	1	NA	1336210	1336794	+	PA14_15710	NA		hypothetical protein	PA3765
818	1	1338277	1336808	1338163	-	PA14_15720	114		hypothetical protein	PA3764
819	2	NA	1338564	1342745	+	PA14_15740, PA14_15750	NA		phosphoribosylformylglycinamidine synthase, NA	PA3763, NA
820	1	1342820	1342925	1343242	+	PA14_15770	105		hypothetical protein	PA3762
821	5	1350637	1343444	1350596	-	PA14_15780, PA14_15790, PA14_15810, PA14_15820, PA14_15830	41		PTS system N-acetylglucosamine-specific, putative phosphoenolpyruvate-protein, putative aminotransferase, putative N-acetylglucosamine-6-phosphate, GntR family transcriptional	PA3761, PA3760, PA3759, PA3758, PA3757
822	1	1351415	1350839	1351339	-	PA14_15840	76		hypothetical protein	PA3756
823	1	1351978	1351402	1351956	-	PA14_15850	22		hypothetical protein	PA3755
824	1	1352066	1352097	1352708	+	PA14_15860	31		hypothetical protein	PA3754
825	2	1352633	1352746	1353461	+	PA14_15870, PA14_15880	113		hypothetical protein, hypothetical protein	PA3753, PA3752
826	2	1353474	1353499	1355431	+	PA14_15890, PA14_15910	25		ion of beta-formyl, hypothetical protein	PA3751, PA3750
827	1	NA	1355439	1356752	-	PA14_15920	NA		major facilitator transporter	PA3749
828	2	NA	1357056	1359161	-	PA14_15930, PA14_15940	NA		hemolysin, hypothetical protein	PA3748, PA3747
829	1	1359433	1359462	1360835	+	PA14_15960	29		signal recognition particle	PA3746
830	3	1360981	1361045	1362604	+	PA14_15970, PA14_15980, PA14_15990	64		30S ribosomal protein, 16S rRNA-processing protein, tRNA (guanine-N(1)-)-methyltransferase	PA3745, PA3744, PA3743
831	1	1362601	1362646	1362996	+	PA14_16000	45		50S ribosomal protein	PA3742
832	1	NA	1363148	1363573	+	PA14_16010	NA		hypothetical protein	PA3741
833	1	1364431	1363643	1364329	-	PA14_16020	102		hypothetical protein	PA3740
834	1	1366444	1364442	1366277	-	PA14_16030	167		putative sodium/hydrogen antiporter	PA3739
835	1	1366464	1366492	1367388	+	PA14_16040	28		site-specific tyrosine recombinase	PA3738
836	1	1367494	1367515	1368243	+	PA14_16050	21		thiol:disulfide interchange protein	PA3737
837	2	1368305	1368457	1371223	+	PA14_16070, PA14_16090	152		homoserine dehydrogenase, threonine synthase	PA3736, PA3735
838	1	1372575	1371277	1372497	-	PA14_16100	78		hypothetical protein	PA3734
839	1	1372566	1372594	1372878	+	PA14_16110	28		NA	NA
840	1	NA	1373065	1374294	-	PA14_16130	NA		hypothetical protein	PA3733
841	2	1374599	1374776	1375929	+	PA14_16140, PA14_16150	177		hypothetical protein, hypothetical protein	PA3732, PA3731
842	1	NA	1375985	1376626	+	PA14_16160	NA		hypothetical protein	PA3730
843	1	1376533	1376662	1378728	+	PA14_16180	129		hypothetical protein	PA3729
844	2	NA	1378878	1384829	+	PA14_16190, PA14_16200	NA		hypothetical protein, hypothetical protein	PA3728, PA3727
845	2	1384910	1384936	1387234	+	PA14_16210, PA14_16220	26		hypothetical protein, single-stranded-DNA-specific exonuclease RecJ	PA3726, PA3725
846	1	1387380	1387521	1389017	+	PA14_16250	141		elastase LasB	PA3724
847	1	1389150	1389187	1390293	+	PA14_16260	37		putative FMN oxidoreductase	PA3723
848	1	1390442	1390481	1390831	+	PA14_16270	39		hypothetical protein	PA3722
849	1	1391607	1390844	1391485	-	PA14_16280	122		putative transcriptional regulator	PA3721
850	2	1391629	1391688	1392282	+	PA14_16290, PA14_16300	59		hypothetical protein, hypothetical protein	PA3720, PA3719
851	1	NA	1392430	1393671	+	PA14_16310	NA		putative MFS permease	PA3718
852	1	1394128	1393758	1394099	-	PA14_16320	29		putative peptidyl-prolyl cis-trans	PA3717
853	1	NA	1394310	1396016	+	PA14_16330	NA		hypothetical protein	PA3716
854	1	1396946	1396095	1396898	-	PA14_16340	48		hypothetical protein	PA3715
855	1	1397796	1397019	1397660	-	PA14_16350	136		putative two-component response	PA3714
856	1	NA	1397984	1399846	-	PA14_16360	NA		hypothetical protein	PA3713
857	1	1400134	1400168	1400863	+	PA14_16370	34		hypothetical protein	PA3712
858	1	1401869	1400900	1401805	-	PA14_16380	64		LysR family transcriptional	PA3711
859	1	1401910	1401977	1403650	+	PA14_16390	67		putative GMC-type oxidoreductase	PA3710
860	1	1403668	1403759	1405378	+	PA14_16410	91		putative MFS transporter	PA3709
861	6	NA	1405645	1413050	+	PA14_16430, PA14_16440, PA14_16450, PA14_16460, PA14_16470, PA14_16480	NA		putative chemotaxis transducer, hypothetical protein, putative methyltransferase, CheW domain-containing protein, putative chemotaxis sensor/effector, chemotaxis-specific methylesterase	PA3708, PA3707, PA3706, PA3705, PA3704, PA3703
862	1	1413118	1413158	1414201	+	PA14_16500	40		two-component response regulator	PA3702
863	1	1414290	1414421	1415419	+	PA14_16510	131		NA	NA
864	1	1415559	1415600	1417105	+	PA14_16530	41		lysyl-tRNA synthetase	PA3700
865	1	1417292	1417317	1418030	+	PA14_16550	25		TetR family transcriptional	PA3699
866	6	NA	1418127	1422537	+	PA14_16560, PA14_16580, PA14_16590, PA14_16600, PA14_16610, PA14_16620	NA		putative lipoprotein, hypothetical protein, hypothetical protein, alpha/beta family hydrolase, hypothetical protein, hypothetical protein	PA3698, PA3697, PA3696, PA3695, PA3694, PA3693
867	2	1424002	1422613	1423851	-	PA14_16630, PA14_16640	151		putative outer membrane, putative lipoprotein	PA3692, PA3691
868	1	1426514	1424253	1426481	-	PA14_16660	33		putative metal-transporting P-type	PA3690
869	1	1426532	1426595	1427065	+	PA14_16670	63		putative transcriptional regulator	PA3689
870	1	NA	1427074	1427418	-	PA14_16680	NA		hypothetical protein	PA3688
871	1	NA	1427626	1430262	+	PA14_16690	NA		phosphoenolpyruvate carboxylase	PA3687
872	1	1430393	1430423	1431070	+	PA14_16700	30		adenylate kinase	PA3686
873	3	NA	1431174	1433160	+	PA14_16710, PA14_16720, PA14_16730	NA		hypothetical protein, hypothetical protein, hypothetical protein	PA3685, PA3684, PA3683
874	2	NA	1433233	1434757	+	PA14_16740, PA14_16750	NA		hypothetical protein, hypothetical protein	PA3682, PA3681
875	1	NA	1434813	1435598	+	PA14_16770	NA		hypothetical protein	PA3680
876	1	1435570	1435627	1436904	+	PA14_16780	57		hypothetical protein	PA3679
877	1	1437599	1436911	1437549	-	PA14_16790	50		TetR family transcriptional	PA3678
878	2	1437607	1437645	1441830	+	PA14_16800, PA14_16820	38		putative efflux transmembrane, putative efflux transmembrane	PA3677, PA3676
879	1	NA	1441873	1442553	-	PA14_16830	NA		hypothetical protein	PA3675
880	1	1443138	1442690	1443088	-	PA14_16840	50		putative lipoprotein	PA3674
881	1	1445777	1443231	1445735	-	PA14_16860	42		glycerol-3-phosphate acyltransferase	PA3673
882	4	1445962	1446019	1450515	+	PA14_16870, PA14_16880, PA14_16890, PA14_16910	57		putative ABC transporter, putative permease of, putative auxiliary component, hypothetical protein	PA3672, PA3671, PA3670, PA3669
883	2	NA	1450522	1452146	-	PA14_16920, PA14_16930	NA		hypothetical protein, putative pyridoxal-phosphate dependent	PA3668, PA3667
884	1	1453376	1452241	1453275	-	PA14_16950	101		tetrahydrodipicolinate succinylase	PA3666
885	2	1454346	1453305	1454288	-	PA14_16960, PA14_16970	58		amino acid transporter, arsenate reductase glutaredoxin	PA3665, PA3664
886	1	NA	1454591	1454944	+	PA14_16980	NA		hypothetical protein	PA3663
887	1	1455336	1454959	1455252	-	PA14_16990	84		hypothetical protein	PA3662
888	1	NA	1455574	1455933	-	PA14_17000	NA		hypothetical protein	PA3661
889	1	NA	1456171	1457916	+	PA14_17010	NA		putative putative Na(+)/H(+)	PA3660
890	2	NA	1457967	1461895	-	PA14_17030, PA14_17040	NA		succinyldiaminopimelate transaminase, PII uridylyl-transferase	PA3659, PA3658
891	1	1462892	1462062	1462847	-	PA14_17050	45		methionine aminopeptidase	PA3657
892	1	NA	1463112	1463852	+	PA14_17060	NA		30S ribosomal protein	PA3656
893	1	1463949	1463983	1464852	+	PA14_17070	34		elongation factor Ts	PA3655
894	1	1465024	1465051	1465788	+	PA14_17080	27		uridylate kinase	PA3654
895	6	1465742	1465791	1472948	+	PA14_17100, PA14_17110, PA14_17120, PA14_17130, PA14_17140, PA14_17150	49		ribosome recycling factor, undecaprenyl pyrophosphate synthetase, phosphatidate cytidylyltransferase, 1-deoxy-D-xylulose 5-phosphate, putative membrane-associated zinc, putative outer membrane	PA3653, PA3652, PA3651, PA3650, PA3649, PA3648
896	6	1472949	1472999	1477570	+	PA14_17170, PA14_17180, PA14_17190, PA14_17210, PA14_17220, PA14_17230	50		hypothetical protein, UDP-3-O-[3-hydroxymyristoyl] glucosamine, (3R)-hydroxymyristoyl-ACP dehydratase, UDP-N-acetylglucosamine acyltransferase, lipid-A-disaccharide synthase, ribonuclease HII	PA3647, PA3646, PA3645, PA3644, PA3643, PA3642
897	1	1477680	1477787	1479202	+	PA14_17250	107		putative amino acid	PA3641
898	1	1479296	1479332	1482853	+	PA14_17260	36		DNA polymerase III	PA3640
899	2	1482960	1483003	1485351	+	PA14_17270, PA14_17280	43		acetyl-CoA carboxylase carboxyltransferase, hypothetical protein	PA3639, PA3638
900	2	1485380	1485522	1487998	+	PA14_17290, PA14_17310	142		CTP synthetase, 2-dehydro-3-deoxyphosphooctonate aldolase	PA3637, PA3636
901	1	1487975	1488044	1489333	+	PA14_17320	69		phosphopyruvate hydratase	PA3635
902	2	1489357	1489398	1490406	+	PA14_17330, PA14_17340	41		hypothetical protein, 2-C-methyl-D-erythritol 4-phosphate	PA3634, PA3633
903	3	1492917	1490467	1492891	-	PA14_17350, PA14_17370, PA14_17380	26		hypothetical protein, putative inner membrane, LysR family transcriptional	PA3632, PA3631, PA3630
904	2	1492969	1493023	1495040	+	PA14_17400, PA14_17410	54		alcohol dehydrogenase class, putative esterase	PA3629, PA3628
905	2	1495087	1495111	1496648	+	PA14_17420, PA14_17440	24		2-C-methyl-D-erythritol 2,4-cyclodiphosphate, tRNA pseudouridine synthase	PA3627, PA3626
906	2	1496533	1496636	1498053	+	PA14_17450, PA14_17460	103		stationary phase survival, protein-L-isoaspartate O-methyltransferase	PA3625, PA3624
907	1	1498088	1498099	1498992	+	PA14_17470	11		hypothetical protein	PA3623
908	1	1498732	1499097	1500101	+	PA14_17480	365		RNA polymerase sigma	PA3622
909	1	1500944	1500527	1500850	-	PA14_17490	94		ferredoxin I	PA3621
910	1	NA	1500917	1503484	-	PA14_17500	NA		DNA mismatch repair	PA3620
911	1	NA	1503610	1504617	-	PA14_17510	NA		hypothetical protein	PA3619
912	1	1504716	1504765	1505271	+	PA14_17520	49		hypothetical protein	PA3618
913	1	1505352	1505405	1506445	+	PA14_17530	53		recombinase A	PA3617
914	1	1506285	1506451	1506912	+	PA14_17540	166		recombination regulator RecX	PA3616
915	1	1508187	1506934	1508004	-	PA14_17550	183		hypothetical protein	PA3615
916	1	1509566	1508087	1509490	-	PA14_17570	76		hypothetical protein	PA3614
917	1	1509648	1509670	1512075	+	PA14_17580	22		hypothetical protein	PA3613
918	2	1512939	1512199	1512849	-	PA14_17590, PA14_17600	90		hypothetical protein, hypothetical protein	PA3612, PA3611
919	4	NA	1513025	1516930	-	PA14_17610, PA14_17620, PA14_17630, PA14_17640	NA		polyamine ABC transporter, polyamine transport protein, polyamine transport protein, polyamine transport protein	PA3610, PA3609, PA3608, PA3607
920	1	NA	1517189	1517905	+	PA14_17650	NA		hypothetical protein	PA3606
921	1	NA	1517909	1518835	-	PA14_17660	NA		hypothetical protein	PA3605
922	1	1518935	1518968	1519621	+	PA14_17670	33		LuxR family transcriptional	PA3604
923	1	1519669	1519693	1520064	+	PA14_17675	24		diacylglycerol kinase	PA3603
924	1	1521829	1520134	1521744	-	PA14_17690	85		hypothetical protein	PA3602
925	2	1521754	1521988	1522403	+	PA14_17700, PA14_17710	234		50S ribosomal protein, 50S ribosomal protein	PA3601, PA3600
926	1	NA	1522431	1523216	-	PA14_17720	NA		LuxR family transcriptional	PA3599
927	1	NA	1523344	1524159	+	PA14_17730	NA		hypothetical protein	PA3598
928	1	NA	1524359	1525681	+	PA14_17740	NA		amino acid ABC	PA3597
929	1	NA	1525771	1526844	+	PA14_17760	NA		putative methylated-DNA--protein-cysteine	PA3596
930	1	NA	1526841	1528250	-	PA14_17780	NA		major facilitator transporter	PA3595
931	1	1529415	1528469	1529356	-	PA14_17790	59		LysR family transcriptional	PA3594
932	2	NA	1529470	1532423	+	PA14_17810, PA14_17820	NA		putative acyl-CoA dehydrogenase, hypothetical protein	PA3593, PA3592
933	4	NA	1532483	1537340	+	PA14_17850, PA14_17860, PA14_17880, PA14_17890	NA		enoyl-CoA hydratase, 3-hydroxy-acyl-CoA dehydrogenase, , putative porin	PA3591, PA3590, PA3589, PA3588
934	1	1538306	1537346	1538266	-	PA14_17900	40		transcriptional regulator MetR	PA3587
935	1	NA	1538565	1539551	+	PA14_17910	NA		alpha/beta family hydrolase	PA3586
936	1	NA	1539568	1539897	-	PA14_17920	NA		membrane protein GlpM	PA3585
937	1	1541614	1540030	1541568	-	PA14_17930	46		glycerol-3-phosphate dehydrogenase	PA3584
938	1	1542640	1541847	1542602	-	PA14_17940	38		glycerol-3-phosphate regulon repressor	PA3583
939	2	NA	1542808	1545204	-	PA14_17960, PA14_17980	NA		glycerol kinase, glycerol uptake facilitator	PA3582, PA3581
940	1	NA	1545469	1545939	+	PA14_17990	NA		hypothetical protein	PA3580
941	1	1545983	1546003	1547487	+	PA14_18010	20		putative glycerol kinase	PA3579
942	1	1547612	1547683	1548468	+	PA14_18020	71		PhzF family phenazine	PA3578
943	1	1549188	1549283	1549459	+	PA14_18040	95		NA	NA
944	1	NA	1549571	1549993	-	PA14_18050	NA		hypothetical protein	PA3576
945	1	1550644	1550092	1550622	-	PA14_18060	22		hypothetical protein	PA3575
946	1	NA	1550805	1551002	+	PA14_18070	NA		NA	NA
947	1	NA	1550981	1551619	-	PA14_18080	NA		TetR family transcriptional	PA3574
948	1	1551809	1551985	1553163	+	PA14_18090	176		major facilitator subfamily	PA3573
949	1	1553376	1553171	1553347	-	PA14_18100	29		hypothetical protein	PA3572
950	1	1554399	1553474	1554397	-	PA14_18110	2		transcriptional regulator MmsR	PA3571
951	3	1554453	1554529	1558922	+	PA14_18120, PA14_18140, PA14_18150	76		methylmalonate-semialdehyde dehydrogenase, 3-hydroxyisobutyrate dehydrogenase, putative acetyl-coa synthetase	PA3570, PA3569, PA3568
952	2	1560358	1558980	1560308	-	PA14_18160, PA14_18180	50		putative oxidoreductase, hypothetical protein	PA3567, PA3566
953	1	NA	1560404	1561324	+	PA14_18200	NA		LysR family transcriptional	PA3565
954	2	1563424	1561612	1563391	-	PA14_18210, PA14_18230	33		TatD family deoxyribonuclease, DNA-binding transcriptional regulator	PA3564, PA3563
955	3	NA	1563719	1569292	+	PA14_18250, PA14_18260, PA14_18275	NA		putative phosphotransferase system, 1-phosphofructokinase, phosphotransferase system, fructose-specific	PA3562, PA3561, PA3560
956	8	1578320	1569445	1578269	-	PA14_18300, PA14_18310, PA14_18320, PA14_18330, PA14_18340, PA14_18350, PA14_18360, PA14_18370	51		putative nucleotide sugar, hypothetical protein, hypothetical protein, 4-amino-4-deoxy-L-arabinose transferase, hypothetical protein, bifunctional UDP-glucuronic acid, putative glycosyl transferase, UDP-4-amino-4-deoxy-L-arabinose--oxoglutarate	PA3559, PA3558, PA3557, PA3556, PA3555, PA3554, PA3553, PA3552
957	1	NA	1578657	1580102	-	PA14_18380	NA		mannose-1-phosphate	PA3551
958	1	1581017	1580299	1580949	-	PA14_18410	68		alginate o-acetyltransferase AlgF	PA3550
959	2	NA	1581022	1583774	-	PA14_18430, PA14_18450	NA		alginate o-acetyltransferase AlgJ, alginate o-acetyltransferase AlgI	PA3549, PA3548
960	8	NA	1584016	1595308	-	PA14_18470, PA14_18480, PA14_18500, PA14_18510, PA14_18520, PA14_18550, PA14_18565, PA14_18580	NA		ion of alginate, alginate biosynthesis protein, alginate-c5-mannuronan-epimerase AlgG, alginate production outer, alginate biosynthetic protein, alginate biosynthesis protein, alginate biosynthesis protein, GDP-mannose 6-dehydrogenase AlgD	PA3547, PA3546, PA3545, PA3544, PA3543, PA3542, PA3541, PA3540
961	1	1597011	1596211	1596990	-	PA14_18590	21		hypothetical protein	PA3539
962	1	1598329	1597097	1598179	-	PA14_18600	150		ABC transporter ATP-binding	PA3538
963	1	NA	1598184	1599101	-	PA14_18610	NA		ornithine carbamoyltransferase	PA3537
964	1	NA	1599380	1599847	+	PA14_18620	NA		hypothetical protein	PA3536
965	1	1603275	1600241	1603228	-	PA14_18630	47		putative serine protease	PA3535
966	1	1603448	1603527	1605635	+	PA14_18640	79		putative oxidoreductase	PA3534
967	1	1605701	1605748	1606074	+	PA14_18650	47		hypothetical protein	PA3533
968	1	NA	1606157	1607308	+	PA14_18660	NA		hypothetical protein	PA3532
969	1	1607882	1607376	1607852	-	PA14_18670	30		bacterioferritin	PA3531
970	1	1608311	1608062	1608283	-	PA14_18680	28		hypothetical protein	PA3530
971	1	1608450	1608543	1609145	+	PA14_18690	93		putative peroxidase	PA3529
972	2	1611065	1609324	1611041	-	PA14_18700, PA14_18710	24		ribonuclease T, dihydroorotase	PA3528, PA3527
973	1	1611143	1611174	1612139	+	PA14_18720	31		OmpA family membrane	PA3526
974	1	1612226	1612257	1613474	+	PA14_18740	31		argininosuccinate synthase	PA3525
975	1	1613981	1613566	1613952	-	PA14_18750	29		lactoylglutathione lyase	PA3524
976	3	NA	1614329	1620116	+	PA14_18760, PA14_18780, PA14_18790	NA		putative RND efflux, putative RND efflux, putative outer membrane	PA3523, PA3522, PA3521
977	1	1620663	1620687	1620881	+	PA14_18800	24		hypothetical protein	PA3520
978	1	1621253	1621282	1622319	+	PA14_18810	29		hypothetical protein	PA3519
979	3	1622325	1622352	1626253	+	PA14_18820, PA14_18830, PA14_18850	27		hypothetical protein, adenylosuccinate lyase, adenylosuccinate lyase	PA3518, PA3517, PA3516
980	1	1626284	1626303	1627376	+	PA14_18860	19		hypothetical protein	PA3515
981	1	1627785	1627576	1627755	-	PA14_18870	30		hypothetical protein	PA3496
982	1	1628594	1627864	1628502	-	PA14_18880	92		endonuclease III	PA3495
983	6	NA	1628499	1634357	-	PA14_18890, PA14_18900, PA14_18910, PA14_18920, PA14_18930, PA14_18950	NA		electron transport complex, hypothetical protein, hypothetical protein, electron transport complex, electron transport complex, hypothetical protein	PA3494, PA3493, PA3492, PA3491, PA3490, PA3489
984	1	1635390	1634535	1635233	-	PA14_18960	157		hypothetical protein	PA3488
985	2	NA	1635662	1641403	-	PA14_18970, PA14_18985	NA		phospholipase D, hypothetical protein	PA3487, PA3486
986	2	NA	1641698	1643358	-	PA14_19010, PA14_19020	NA		hypothetical protein, hypothetical protein	PA3485, PA3484
987	1	1644470	1643445	1644245	-	PA14_19030	225		hypothetical protein	PA3483
988	1	1646347	1644279	1646315	-	PA14_19050	32		methionyl-tRNA synthetase	PA3482
989	1	1646412	1646446	1647540	+	PA14_19065	34		hypothetical protein	PA3481
990	1	1647608	1647642	1648208	+	PA14_19090	34		deoxycytidine triphosphate deaminase	PA3480
991	2	1648405	1648632	1650865	+	PA14_19100, PA14_19110	227		rhamnosyltransferase chain A, rhamnosyltransferase chain B	PA3479, PA3478
992	1	1650961	1650990	1651715	+	PA14_19120	29		transcriptional regulator RhlR	PA3477
993	1	1651796	1651896	1652501	+	PA14_19130	100		autoinducer synthesis protein	PA3476
994	1	NA	1652656	1653462	+	PA14_19140	NA		cyclohexadienyl dehydratase precursor	PA3475
995	2	NA	1653556	1655312	+	PA14_19150, PA14_19160	NA		hypothetical protein, hypothetical protein	PA3474, PA3473
996	1	1656176	1655333	1655929	-	PA14_19170	247		hypothetical protein	PA3472
997	1	1656348	1656387	1658081	+	PA14_19190	39		malate dehydrogenase	PA3471
998	3	NA	1658203	1660546	-	PA14_19205, PA14_19210, PA14_19230	NA		hypothetical protein, hypothetical protein, hypothetical protein	PA3470, PA3469, PA3468
999	1	NA	1660714	1662081	-	PA14_19270	NA		putative MFS transporter	PA3467
1000	1	1662248	1662267	1663607	+	PA14_19290	19		putative ATP-dependent RNA	PA3466
1001	1	1665475	1663729	1665444	-	PA14_19310	31		hypothetical protein	PA3465
1002	1	NA	1665661	1666986	+	PA14_19320	NA		hypothetical protein	PA3464
1003	1	1667362	1667115	1667345	-	PA14_19330	17		hypothetical protein	PA3463
1004	1	NA	1667396	1670152	-	PA14_19340	NA		putative sensor/response regulator	PA3462
1005	2	NA	1670289	1673239	-	PA14_19350, PA14_19360	NA		hypothetical protein, GNAT family acetyltransferase	PA3461, PA3460
1006	1	1675111	1673280	1675049	-	PA14_19370	62		putative asparagine synthetase,	PA3459
1007	1	1674740	1675192	1675665	+	PA14_19380	452		putative transcriptional regulator	PA3458
1008	1	NA	1675921	1676673	-	PA14_19390	NA		hypothetical protein	PA3457
1009	1	NA	1676774	1678738	-	PA14_19400	NA		5-methylaminomethyl-2-thiouridine	PA3456
1010	1	1678861	1678882	1680372	+	PA14_19410	21		hypothetical protein	PA3455
1011	1	NA	1680525	1681709	+	PA14_19430	NA		putative acyl-CoA thiolase	PA3454
1012	1	1681812	1681838	1682503	+	PA14_19450	26		hypothetical protein	PA3453
1013	2	1684740	1682727	1684710	-	PA14_19470, PA14_19480	30		malate:quinone oxidoreductase, hypothetical protein	PA3452, PA3451
1014	1	1684894	1684916	1685554	+	PA14_19490	22		putative antioxidant protein	PA3450
1015	3	NA	1685805	1688383	+	PA14_19500, PA14_19510, PA14_19520	NA		hypothetical protein, ABC transporter permease, ABC transporter ATP-binding	PA3449, PA3448, PA3447
1016	5	1688481	1688537	1693076	+	PA14_19530, PA14_19540, PA14_19560, PA14_19570, PA14_19580	56		NAD(P)H-dependent FMN reductase, hypothetical protein, alkanesulfonate monooxygenase, ABC transporter permease, aliphatic sulfonates transport	PA3446, PA3445, PA3444, PA3443, PA3442
1017	1	1693040	1693117	1693332	+	PA14_19590	77		putative molybdopterin-binding protein	PA3441
1018	1	1694000	1693512	1693850	-	PA14_19600	150		NA	NA
1019	1	1694265	1693902	1694213	-	PA14_19610	52		hypothetical protein	PA3440
1020	1	1694745	1694342	1694713	-	PA14_19620	32		D-erythro-7,8-dihydroneopterin triphosphate	PA3439
1021	1	1695480	1694715	1695275	-	PA14_19630	205		GTP cyclohydrolase I	PA3438
1022	1	1696023	1695293	1695997	-	PA14_19640	26		short chain dehydrogenase	PA3437
1023	1	NA	1696108	1696665	-	PA14_19650	NA		hypothetical protein	PA3436
1024	1	1696917	1696945	1697397	+	PA14_19660	28		flavodoxin	PA3435
1025	1	NA	1697536	1698429	-	PA14_19670	NA		LysR family transcriptional	PA3433
1026	2	1698495	1698525	1699587	+	PA14_19680, PA14_19690	30		hypothetical protein, hypothetical protein	PA3432, PA3431
1027	3	1699687	1699716	1701780	+	PA14_19700, PA14_19710, PA14_19720	29		aldolase II superfamily, alpha/beta family hydrolase, hypothetical protein	PA3430, PA3429, PA3428
1028	1	1701867	1701896	1702807	+	PA14_19730	29		oxidoreductase	PA3427
1029	1	NA	1702924	1703694	+	PA14_19740	NA		enoyl-CoA hydratase	PA3426
1030	2	NA	1703714	1705499	-	PA14_19750, PA14_19770	NA		hypothetical protein, hypothetical protein	PA3425, PA3424
1031	1	NA	1705590	1706333	-	PA14_19800	NA		AraC family transcriptional	PA3423
1032	2	NA	1706618	1709802	+	PA14_19810, PA14_19830	NA		hypothetical protein, hypothetical protein	PA3422, PA3421
1033	1	NA	1709952	1712435	+	PA14_19850	NA		putative transcriptional regulator	PA3420
1034	1	NA	1712442	1713254	-	PA14_19860	NA		hypothetical protein	PA3419
1035	1	1713470	1713500	1714525	+	PA14_19870	30		leucine dehydrogenase	PA3418
1036	3	NA	1714667	1717888	+	PA14_19900, PA14_19910, PA14_19920	NA		putative pyruvate dehydrogenase, putative pyruvate dehydrogenase, branched-chain alpha-keto acid	PA3417, PA3416, PA3415
1037	2	NA	1717889	1718965	-	PA14_19930, PA14_19940	NA		NA, hypothetical protein	NA, PA3414
1038	1	1719315	1719001	1719267	-	PA14_19950	48		hypothetical protein	PA3413
1039	1	NA	1719477	1719746	+	PA14_19960	NA		hypothetical protein	PA3412
1040	1	NA	1719866	1720084	+	PA14_19970	NA		hypothetical protein	PA3411
1041	1	NA	1720161	1720676	+	PA14_19990	NA		RNA polymerase ECF-subfamily	PA3410
1042	1	1720718	1720741	1721727	+	PA14_20000	23		putative transmembrane sensor	PA3409
1043	1	NA	1721937	1724612	+	PA14_20010	NA		heme uptake outer	PA3408
1044	1	NA	1724698	1725315	+	PA14_20020	NA		heme acquisition protein	PA3407
1045	3	NA	1725533	1730003	+	PA14_20030, PA14_20040, PA14_20050	NA		transport protein HasD, metalloprotease secretion protein, putative outer membrane	PA3406, PA3405, PA3404
1046	1	NA	1729996	1730283	-	PA14_20060	NA		NA	NA
1047	1	NA	1730458	1730943	+	PA14_20070	NA		hypothetical protein	PA3403
1048	3	1731033	1731056	1734333	+	PA14_20080, PA14_20100, PA14_20110	23		hypothetical protein, hypothetical protein, hypothetical protein	PA3402, PA3401, PA3400
1049	1	1734363	1734387	1734728	+	PA14_20120	24		hypothetical protein	PA3399
1050	1	NA	1734730	1735656	-	PA14_20130	NA		LysR family transcriptional	PA3398
1051	1	1735874	1735930	1736706	+	PA14_20140	56		ferredoxin--NADP+ reductase	PA3397
1052	6	NA	1736789	1744455	-	PA14_20150, PA14_20170, PA14_20180, PA14_20190, PA14_20200, PA14_20230	NA		NosL protein, NosY protein, NosF protein, copper ABC transporter, nitrous-oxide reductase, regulatory protein NosR	PA3396, PA3395, PA3394, PA3393, PA3392, PA3391
1053	1	NA	1744684	1745097	-	PA14_20240	NA		putative ring-cleaving dioxygenase	PA3389
1054	1	NA	1745158	1745460	+	PA14_20250	NA		hypothetical protein	PA3390
1055	2	NA	1745467	1746985	-	PA14_20260, PA14_20270	NA		hypothetical protein, beta-ketoacyl reductase	PA3388, PA3387
1056	1	NA	1747083	1747448	-	PA14_20280	NA		hypothetical protein	PA3386
1057	1	1748046	1747602	1747928	-	PA14_20290	118		DNA binding-protein	PA3385
1058	11	NA	1748289	1757597	+	PA14_20300, PA14_20320, PA14_20330, PA14_20350, PA14_20360, PA14_20370, PA14_20380, PA14_20390, PA14_20400, PA14_20420, PA14_20430	NA		ATP-binding component of, binding protein component, phosphonate ABC tranporter, putative transcriptional regulator, putative phosphonate metabolism, carbon-phosphorus lyase complex, hypothetical protein, hypothetical protein, phosphonate C-P lyase, phosphonate ABC transporter,, phosphonate metabolism protein	PA3384, PA3383, PA3382, PA3381, PA3380, PA3379, PA3378, PA3377, PA3376, PA3375, PA3374
1059	2	NA	1757597	1758915	+	PA14_20440, PA14_20450	NA		ATP-binding component of, carbon-phosphorus lyase complex	PA3373, PA3372
1060	3	1759755	1758954	1759704	-	PA14_20460, PA14_20470, PA14_20480	51		hypothetical protein, NA, hypothetical protein	PA3371, NA, PA3369
1061	1	NA	1759897	1760415	-	PA14_20491	NA		putatative acetyltransferase	PA3368
1062	1	1760535	1760535	1760608	+	PA14_20500	0		NA	NA
1063	2	1762364	1762508	1766208	+	PA14_20510, PA14_20520	144		NA, NA	NA, NA
1064	1	1765729	1766195	1766671	+	PA14_20530	466		NA	NA
1065	1	1767110	1767110	1767400	+	PA14_NovelOrf_008	0	TU contains unannotated ORF	Unannotated ORF	PA14_NovelOrf_008
1066	1	1768365	1768003	1768341	-	PA14_20550	24		hypothetical protein	PA3367
1067	4	1768474	1768608	1772617	+	PA14_20560, PA14_20570, PA14_20580, PA14_20590	134		acylamide amidohydrolase, putative chaperone, aliphatic amidase expression-regulating, aliphatic amidase regulator	PA3366, PA3365, PA3364, PA3363
1068	1	NA	1773139	1773813	+	PA14_20600	NA		NA	NA
1069	1	1774331	1773860	1774207	-	PA14_20610	124		fucose-binding lectin PA-IIL	PA3361
1070	2	NA	1774674	1776765	+	PA14_20620, PA14_20630	NA		HlyD family secretion, hypothetical protein	PA3360, PA3359
1071	2	NA	1776770	1779051	-	PA14_20640, PA14_20650	NA		hypothetical protein, D-serine dehydratase	PA3358, PA3357
1072	1	1779199	1779377	1780618	+	PA14_20670	178		putative glutamine synthetase	PA3356
1073	1	NA	1780802	1782106	+	PA14_20680	NA		putative MFS transporter	PA3355
1074	1	1781871	1782148	1782759	+	PA14_20690	277		hypothetical protein	PA3354
1075	1	1783571	1782763	1783554	-	PA14_20700	17		putative glycosyltransferase	PA3353
1076	2	1784461	1783583	1784431	-	PA14_20720, PA14_20730	30		hypothetical protein, hypothetical protein	PA3352, PA3351
1077	1	1785346	1784576	1785274	-	PA14_20740	72		flagellar basal body	PA3350
1078	2	1785160	1785406	1787239	+	PA14_20750, PA14_20760	246		putative chemotaxis protein, putative chemotaxis protein	PA3349, PA3348
1079	1	1787516	1787554	1787859	+	PA14_20770	38		hypothetical protein	PA3347
1080	2	1787815	1787861	1789992	+	PA14_20780, PA14_20800	46		putative two-component response, histidine phosphotransfer domain-containing	PA3346, PA3345
1081	1	1790059	1790076	1792214	+	PA14_20810	17		ATP-dependent DNA helicase	PA3344
1082	1	1792284	1792303	1793472	+	PA14_20820	19		putative two-component response	PA3343
1083	1	NA	1793623	1794639	+	PA14_20840	NA		hypothetical protein	PA3342
1084	1	1794715	1794757	1795191	+	PA14_20850	42		MarR family transcriptional	PA3341
1085	1	1795411	1795468	1797513	+	PA14_20860	57		putative Tfp pilus	PA3340
1086	1	NA	1797521	1799707	-	PA14_20870	NA		hypothetical protein	PA3339
1087	1	NA	1799776	1800066	+	PA14_20880	NA		hypothetical protein	PA3338
1088	1	1800137	1800156	1801154	+	PA14_20890	19		ADP-L-glycero-D-mannoheptose 6-epimerase	PA3337
1089	1	1802409	1801165	1802331	-	PA14_20900	78		putative MFS transporter	PA3336
1090	2	1803562	1802423	1803532	-	PA14_20920, PA14_20940	30		hypothetical protein, putative acyl carrier	PA3335, PA3334
1091	4	1807241	1803546	1807127	-	PA14_20950, PA14_20960, PA14_20970, PA14_20980	114		3-oxoacyl-(acyl carrier protein), putativ isomerase, cytochrome P450, putative short chain	PA3333, PA3332, PA3331, PA3330
1092	2	1809695	1807129	1809620	-	PA14_21000, PA14_21010	75		hypothetical protein, putative FAD-dependent monooxygenase	PA3329, PA3328
1093	1	1816815	1809617	1816675	-	PA14_21020	140		putative non-ribosomal peptide	PA3327
1094	1	1817052	1817157	1817762	+	PA14_21030	105		ATP-dependent Clp protease	PA3326
1095	3	NA	1818107	1821654	-	PA14_21040, PA14_21050, PA14_21060	NA		hypothetical protein, short chain dehydrogenase, hypothetical protein	PA3325, PA3324, PA3323
1096	1	NA	1822080	1822778	+	PA14_21070	NA		MerR family transcriptional	PA3322
1097	1	NA	1822786	1823700	-	PA14_21080	NA		LysR family transcriptional	PA3321
1098	1	NA	1823789	1824244	+	PA14_21090	NA		hypothetical protein	PA3320
1099	1	1824371	1824476	1826554	+	PA14_21110	105		non-hemolytic phospholipase C	PA3319
1100	6	1831297	1826612	1831264	-	PA14_21120, PA14_21130, PA14_21140, PA14_21150, PA14_21160, PA14_21175	33	Annotation of ORF corrected by 5' end sequencing (original ORF: 1830407..1831414)	hypothetical protein, putative outer membrane, ABC transporter permease, ABC transporter permease, ABC transporter ATP-binding, hypothetical protein	PA3318, PA3317, PA3316, PA3315, PA3314, PA3313
1101	1	NA	1831413	1832303	+	PA14_21180	NA		putative 3-hydroxyisobutyrate dehydrogenase	PA3312
1102	1	NA	1832307	1834664	-	PA14_21190	NA		hypothetical protein	PA3311
1103	1	NA	1834819	1836474	+	PA14_21210	NA		hypothetical protein	PA3310
1104	1	1837049	1836543	1836998	-	PA14_21220	51		hypothetical protein	PA3309
1105	1	NA	1837281	1840133	-	PA14_21230	NA		ATP-dependent helicase HepA	PA3308
1106	1	1840301	1840369	1840677	+	PA14_21240	68		hypothetical protein	PA3307
1107	1	1840731	1840731	1841333	+	PA14_21250	0		hypothetical protein	PA3306
1108	1	1841702	1841740	1841853	+	PA14_21260	38		NA	NA
1109	1	1841999	1842061	1844055	+	PA14_21280	62		hypothetical protein	PA3305
1110	1	NA	1844273	1845130	+	PA14_21290	NA		hypothetical protein	PA3304
1111	2	1846973	1845111	1846907	-	PA14_21300, PA14_21310	66		putative MFS transporte, hypothetical protein	PA3303, PA3302
1112	1	1847884	1846904	1847854	-	PA14_21320	30		hypothetical protein	PA3301
1113	1	NA	1848101	1849789	+	PA14_21340	NA		acyl-CoA synthetase	PA3300
1114	1	1849930	1850024	1851712	+	PA14_21370	94		acyl-CoA synthetase	PA3299
1115	1	1851689	1851742	1852044	+	PA14_21380	53		hypothetical protein	PA3298
1116	1	NA	1852220	1856200	+	PA14_21400	NA		putative ATP-dependent helicase	PA3297
1117	1	NA	1856273	1857703	-	PA14_21410	NA		alkaline phosphatase	PA3296
1118	1	1857877	1857908	1858345	+	PA14_21440	31		putative HIT family	PA3295
1119	1	NA	1858574	1860640	+	PA14_21450	NA		hypothetical protein	PA3294
1120	2	1860582	1860650	1861983	+	PA14_21460, PA14_21470	68		hypothetical protein, NA	PA3293, NA
1121	2	1862482	1862506	1865723	+	PA14_21480, PA14_21490	24		hypothetical protein, hypothetical protein	PA3291, PA3290
1122	1	1866196	1865762	1866175	-	PA14_21510	21		hypothetical protein	PA3289
1123	1	1866264	1866288	1866758	+	PA14_21520	24	Annotation of ORF corrected by 5' end sequencing (original ORF: 1866255..1866758)	hypothetical protein	PA3288
1124	1	NA	1866762	1867277	-	PA14_21530	NA		ankyrin domain-containing protein	PA3287
1125	3	1867685	1867837	1869736	+	PA14_21540, PA14_21550, PA14_21560	152		3-oxoacyl-(acyl carrier protein), RNA polymerase ECF-subfamily, NA	PA3286, PA3285, NA
1126	1	NA	1870142	1870456	+	PA14_21570	NA		hypothetical protein	PA3284
1127	3	NA	1870475	1872653	+	PA14_21580, PA14_21590, PA14_21600	NA		hypothetical protein, hypothetical protein, hypothetical protein	PA3283, PA3282, PA3281
1128	1	NA	1872900	1874216	+	PA14_21610	NA		pyrophosphate-specific outer membrane	PA3280
1129	1	NA	1874675	1875997	+	PA14_21620	NA		phosphate-specific outer membrane	PA3279
1130	1	1876142	1876166	1876465	+	PA14_21630	24		hypothetical protein	PA3278
1131	1	NA	1876590	1877402	+	PA14_21640	NA		short chain dehydrogenase	PA3277
1132	2	1877502	1877635	1878383	+	PA14_21650, PA14_21660	133		hypothetical protein, hypothetical protein	PA3276, PA3275
1133	1	NA	1878462	1878749	-	PA14_21670	NA		hypothetical protein	PA3274
1134	2	NA	1878700	1883714	+	PA14_21680, PA14_21690	NA		hypothetical protein, putative ATP-dependent DNA	PA3273, PA3272
1135	1	NA	1883722	1887201	-	PA14_21700	NA		putative two-component sensor	PA3271
1136	1	1887356	1887467	1888054	+	PA14_21710	111		hypothetical protein	PA3270
1137	1	NA	1888121	1888975	+	PA14_21720	NA		AraC family transcriptional	PA3269
1138	1	NA	1889072	1891237	+	PA14_21730	NA		putative TonB-dependent receptor	PA3268
1139	1	NA	1891412	1893286	+	PA14_21750	NA		hypothetical protein	PA3267
1140	1	1893707	1893347	1893556	-	PA14_21760	151		cold acclimation protein	PA3266
1141	2	NA	1893771	1895160	-	PA14_21770, PA14_21780	NA		DMT family permease, putative transporter	PA3265, PA3264
1142	1	1896192	1895247	1896167	-	PA14_21790	25		recombination associated protein	PA3263
1143	2	NA	1896332	1896497	+	PA14_21800, PA14_21810	NA		NA, NA	NA, NA
1144	1	1896713	1896757	1897518	+	PA14_21820	44		putative peptidyl-prolyl cis-trans	PA3262
1145	1	1897755	1897888	1898319	+	PA14_21830	133		NA	NA
1146	1	1899089	1898307	1899053	-	PA14_21840	36		hypothetical protein	PA3261
1147	2	1899141	1899157	1900305	+	PA14_21850, PA14_21860	16		putative transcriptional regulator, hypothetical protein	PA3260, PA3259
1148	1	NA	1900319	1902124	-	PA14_21870	NA		EAL domain/GGDEF domain-containing	PA3258
1149	1	1904368	1902163	1904259	-	PA14_21880	109		periplasmic tail-specific protease	PA3257
1150	1	1904300	1904389	1905351	+	PA14_21890	89		putative oxidoreductase	PA3256
1151	1	NA	1905418	1905996	-	PA14_21900	NA		HAD-superfamily hydrolase	PA3255
1152	5	1910781	1906068	1910608	-	PA14_21910, PA14_21920, PA14_21930, PA14_21940, PA14_21960	173		putative ATP-binding component, putative permease of, putative permease of, hypothetical protein, hypothetical protein	PA3254, PA3253, PA3252, PA3251, PA3250
1153	2	1910811	1910972	1912305	+	PA14_21970, PA14_21980	161		transcriptional regulator, hypothetical protein	PA3249, PA3248
1154	1	NA	1912348	1913637	-	PA14_21990	NA		putative aminopeptidase 2	PA3247
1155	1	1914609	1913806	1914441	-	PA14_22000	168		pseudouridine synthase RluA	PA3246
1156	1	1914829	1914545	1914799	-	PA14_22010	30		cell division topological	PA3245
1157	1	1915658	1914796	1915611	-	PA14_22020	47		cell division inhibitor	PA3244
1158	1	1916486	1915673	1916464	-	PA14_22040	22		septum formation inhibitor	PA3243
1159	1	1916599	1916624	1917562	+	PA14_22050	25		lipid A biosynthesis	PA3242
1160	1	1917608	1917630	1918799	+	PA14_22060	22		hypothetical protein	PA3241
1161	1	1919505	1918863	1919495	-	PA14_22075	10		putative pirin-related protein	PA3240
1162	1	NA	1922000	1922695	-	PA14_22080	NA		NA	NA
1163	1	NA	1923032	1924132	-	PA14_22090	NA		NA	NA
1164	1	NA	1926578	1927303	-	PA14_22100	NA		NA	NA
1165	1	NA	1927460	1928419	-	PA14_22110	NA		NA	NA
1166	2	NA	1929042	1932050	-	PA14_22120, PA14_22130	NA		NA, NA	NA, NA
1167	1	NA	1933020	1933820	-	PA14_22140	NA		NA	NA
1168	1	NA	1934355	1934861	-	PA14_22160	NA		NA	NA
1169	2	1935531	1934977	1935500	-	PA14_22180, PA14_22190	31		NA, NA	NA, NA
1170	2	NA	1935570	1936104	-	PA14_22210, PA14_22220	NA		NA, NA	NA, NA
1171	1	NA	1936671	1936868	-	PA14_22230	NA		NA	NA
1172	3	NA	1937290	1938800	-	PA14_22240, PA14_22250, PA14_22260	NA		NA, NA, NA	NA, NA, NA
1173	2	NA	1939714	1941585	-	PA14_22270, PA14_22280	NA		NA, NA	NA, NA
1174	2	1943919	1941725	1943893	-	PA14_22290, PA14_22310	26		hypothetical protein, hypothetical protein	PA3239, PA3238
1175	1	NA	1944036	1944257	-	PA14_22320	NA		hypothetical protein	PA3237
1176	1	NA	1944551	1945408	+	PA14_22330	NA		putative glycine betaine-binding	PA3236
1177	2	NA	1945626	1947589	+	PA14_22340, PA14_22350	NA		hypothetical protein, acetate permease	PA3235, PA3234
1178	2	1947586	1947679	1950101	+	PA14_22370, PA14_22380	93		hypothetical protein, DNA polymerase III	PA3233, PA3232
1179	1	NA	1950210	1950368	+	PA14_22400	NA		hypothetical protein	PA3231
1180	1	NA	1950645	1951769	+	PA14_22410	NA		hypothetical protein	PA3230
1181	1	NA	1951802	1952068	-	PA14_22420	NA		hypothetical protein	PA3229
1182	2	1954867	1952350	1954808	-	PA14_22440, PA14_22450	59		putative ATP-binding/permease fusion, peptidyl-prolyl cis-trans isomerase	PA3228, PA3227
1183	2	1956759	1954790	1956553	-	PA14_22460, PA14_22470	206		alpha/beta family hydrolase, LysR family transcriptional	PA3226, PA3225
1184	1	NA	1956753	1957070	+	PA14_22480	NA		hypothetical protein	PA3224
1185	1	NA	1957217	1957858	+	PA14_22490	NA		acyl carrier protein	PA3223
1186	4	NA	1958113	1961041	-	PA14_22500, PA14_22510, PA14_22520, PA14_22530	NA		NA, NA, NA, NA	NA, NA, NA, NA
1187	1	NA	1961117	1961671	-	PA14_22540	NA		NA	NA
1188	1	NA	1961914	1962726	+	PA14_22550	NA		NA	NA
1189	2	1964062	1962803	1964041	-	PA14_22560, PA14_22570	21		putative permease, CsaA protein	PA3222, PA3221
1190	1	1964890	1964106	1964870	-	PA14_22580	20		AraC family transcriptional	PA3220
1191	2	NA	1965017	1966881	+	PA14_22590, PA14_22600	NA		hypothetical protein, NA	PA3219, NA
1192	1	1968346	1966871	1968262	-	PA14_22620	84		hypothetical protein	PA3217
1193	1	1968860	1968479	1968796	-	PA14_22630	64		hypothetical protein	PA3216
1194	1	1968888	1968939	1969952	+	PA14_22640	51		AraC family transcriptional	PA3215
1195	4	1973492	1969975	1973492	-	PA14_22650, PA14_22660, PA14_22670, PA14_22680	0		putative ABC-type uncharacterized, hypothetical protein, putative ATP-binding component, putative permease of	PA3214, PA3213, PA3212, PA3211
1196	1	NA	1973559	1975013	-	PA14_22690	NA		potassium uptake protein	PA3210
1197	1	NA	1975171	1975542	+	PA14_22700	NA		putative ferredoxin	PA3209
1198	1	NA	1975607	1976167	+	PA14_22710	NA		hypothetical protein	PA3208
1199	1	NA	1976148	1976624	-	PA14_22720	NA		hypothetical protein	PA3207
1200	1	NA	1976668	1978005	-	PA14_22730	NA		putative two-component sensor	PA3206
1201	1	1978597	1978120	1978560	-	PA14_22740	37		hypothetical protein	PA3205
1202	4	1980832	1978689	1980809	-	PA14_22760, PA14_22770, PA14_22780, PA14_22800	23		putative two-component response, hypothetical protein, YciI-like protein, intracellular septation protein	PA3204, PA3203, PA3202, PA3201
1203	3	NA	1981024	1983462	+	PA14_22820, PA14_22830, PA14_22840	NA		PHP domain-containing protein, SUA5/yciO/yrdC family:Sua5/YciO/YrdC/YwlC, hypothetical protein	PA3200, PA3199, PA3198
1204	1	1983557	1983607	1984599	+	PA14_22860	50		putative transcriptional regulator	PA3197
1205	2	1984620	1984681	1985508	+	PA14_22870, PA14_22880	61		hypothetical protein, NA	PA3196, NA
1206	1	1986550	1985515	1986519	-	PA14_22890	31		glyceraldehyde-3-phosphate dehydrogenase	PA3195
1207	1	1986563	1986649	1988475	+	PA14_22910	86		phosphogluconate dehydratase	PA3194
1208	3	NA	1988578	1991781	+	PA14_22930, PA14_22940, PA14_22960	NA		glucokinase, two-component response regulator, putative two-component sensor	PA3193, PA3192, PA3191
1209	4	1992259	1992306	1996632	+	PA14_22980, PA14_22990, PA14_23000, PA14_23010	47		putative binding protein, putative permease of, putative permease of, putative ATP-binding component	PA3190, PA3189, PA3188, PA3187
1210	1	NA	1996676	1998040	+	PA14_23030	NA		glucose/carbohydrate outer membrane porin OprB	PA3186
1211	1	1998207	1998255	1999106	+	PA14_23050	48		hypothetical protein	PA3185
1212	1	NA	1999115	1999972	-	PA14_23060	NA		DNA-binding transcriptional regulator	PA3184
1213	3	NA	2000159	2003011	+	PA14_23070, PA14_23080, PA14_23090	NA		glucose-6-phosphate 1-dehydrogenase, 6-phosphogluconolactonase, keto-hydroxyglutarate-aldolase/keto-deoxy-	PA3183, PA3182, PA3181
1214	1	NA	2003101	2003538	-	PA14_23100	NA		hypothetical protein	PA3180
1215	1	2003587	2003686	2004846	+	PA14_23110	99		hypothetical protein	PA3179
1216	1	NA	2004939	2005316	+	PA14_23120	NA		hypothetical protein	PA3178
1217	1	2006458	2005423	2006346	-	PA14_23130	112		sensory box GGDEF	PA3177
1218	3	2009518	2006575	2009507	-	PA14_23160, PA14_23170, PA14_23190	11		sodium/glutamate symporter, formimidoylglutamase, putative transcriptional regulator	PA3176, PA3175, PA3174
1219	3	2011870	2009666	2011846	-	PA14_23200, PA14_23210, PA14_23220	24		short chain dehydrogenase, phosphoglycolate phosphatase, 3-demethylubiquinone-9 3-methyltransferase	PA3173, PA3172, PA3171
1220	1	NA	2011997	2013331	-	PA14_23240	NA		N-ethylammeline chlorohydrolase	PA3170
1221	1	NA	2013441	2014517	+	PA14_23250	NA		methylthioribose-1-phosphate isomerase	PA3169
1222	1	2014592	2014754	2017519	+	PA14_23260	162		DNA gyrase subunit	PA3168
1223	2	2017592	2017607	2019789	+	PA14_23270, PA14_23280	15		phosphoserine aminotransferase, chorismate mutase	PA3167, PA3166
1224	3	NA	2019858	2023889	+	PA14_23290, PA14_23310, PA14_23320	NA		histidinol-phosphate aminotransferase, NA, cytidylate kinase	PA3165, NA, PA3163
1225	1	2023942	2024157	2025836	+	PA14_23330	215		30S ribosomal protein	PA3162
1226	2	2025937	2025973	2026590	+	PA14_23340, PA14_23350	36		NA, NA	NA, NA
1227	1	2026827	2026846	2027928	+	PA14_23360	19		O-antigen chain length	PA3160
1228	1	2027906	2028084	2029220	+	PA14_23370	178		NA	NA
1229	1	2029279	2029301	2030569	+	PA14_23380	22		NA	NA
1230	2	NA	2030647	2033236	+	PA14_23390, PA14_23400	NA		NA, NA	NA, NA
1231	1	2033207	2033233	2034075	+	PA14_23410	26		NA	NA
1232	5	2034115	2034189	2041165	+	PA14_23420, PA14_23430, PA14_23440, PA14_23450, PA14_23460	74		NA, NA, NA, putative NAD dependent, putative group 4	NA, NA, NA, PA3146, PA3145
1233	1	2041516	2041610	2043607	+	PA14_23470	94		nucleotide sugar epimerase/dehydratase	PA3141
1234	1	NA	2043798	2044127	+	PA14_23480	NA		hypothetical protein	PA3140
1235	1	2044275	2044203	2044275	-	PA14_23490	0		NA	NA
1236	1	2045615	2044344	2045540	-	PA14_23500	75		aromatic amino acid	PA3139
1237	1	NA	2045728	2047740	+	PA14_23510	NA		excinuclease ABC subunit	PA3138
1238	2	NA	2047744	2050360	-	PA14_23520, PA14_23530	NA		putative MFS transporter, putative secretion protein	PA3137, PA3136
1239	1	2050404	2050430	2051350	+	PA14_23540	26		putative transcriptional regulator	PA3135
1240	1	2051347	2051388	2052872	+	PA14_23560	41		NA	NA
1241	1	2053367	2053367	2053439	+	PA14_23570	0		NA	NA
1242	1	2053489	2053489	2053561	+	PA14_23580	0		NA	NA
1243	2	2053566	2053723	2055134	+	PA14_23590, PA14_23610	157		putative transcriptional regulator, putative hydrolase	PA3133, PA3132
1244	2	2055192	2055247	2056331	+	PA14_23620, PA14_23630	55		putative aldolase, hypothetical protein	PA3131, PA3130
1245	1	NA	2056424	2057383	+	PA14_23640	NA		hypothetical protein	PA3129
1246	2	2058987	2057398	2058964	-	PA14_23650, PA14_23670	23		short chain dehydrogenase, hypothetical protein	PA3128, PA3127
1247	1	2059106	2059122	2059571	+	PA14_23680	16		heat-shock protein IbpA	PA3126
1248	1	NA	2059615	2060943	-	PA14_23690	NA		putative secreted protein	PA3125
1249	1	2060974	2061055	2061966	+	PA14_23700	81		LysR family transcriptional	PA3124
1250	1	2061971	2062046	2062423	+	PA14_23720	75		putative translation initiation	PA3123
1251	1	NA	2062516	2063409	-	PA14_23730	NA		LysR family transcriptional	PA3122
1252	2	2063529	2063572	2065646	+	PA14_23750, PA14_23760	43		isopropylmalate isomerase large, isopropylmalate isomerase small	PA3121, PA3120
1253	1	NA	2065916	2066479	+	PA14_23770	NA		putative biotin synthesis	PA3119
1254	1	2066420	2066538	2067620	+	PA14_23790	118		3-isopropylmalate dehydrogenase	PA3118
1255	1	NA	2067690	2068802	+	PA14_23800	NA		aspartate-semialdehyde dehydrogenase	PA3117
1256	1	NA	2068904	2069914	+	PA14_23810	NA		aspartate-semialdehyde dehydrogenase	PA3116
1257	1	2069930	2070083	2072857	+	PA14_23830	153		pilus assembly protein	PA3115
1258	1	NA	2072879	2073736	+	PA14_23840	NA		tRNA pseudouridine synthase	PA3114
1259	1	2073767	2073825	2074460	+	PA14_23850	58		N-(5'-phosphoribosyl)anthranilate isomerase	PA3113
1260	3	2074662	2074729	2077538	+	PA14_23860, PA14_23880, PA14_23890	67		acetyl-CoA carboxylase subunit, folylpolyglutamate synthetase, hypothetical protein	PA3112, PA3111, PA3110
1261	1	2077587	2077612	2078154	+	PA14_23900	25		hypothetical protein	PA3109
1262	3	2078193	2078376	2081873	+	PA14_23920, PA14_23930, PA14_23950	183		amidophosphoribosyltransferase, O-succinylhomoserine sulfhydrylase, oxidoreductase	PA3108, PA3107, PA3106
1263	2	2084637	2081960	2084597	-	PA14_23970, PA14_23980	40	Annotation of ORF corrected by 5' end sequencing (original ORF: 2083941..2084648)	general secretion pathway, secretion protein XcpP	PA3105, PA3104
1264	2	2084733	2084868	2087593	+	PA14_23990, PA14_24010	135		general secretion pathway, general secretion pathway	PA3103, PA3102
1265	7	2087568	2087598	2092334	+	PA14_24020, PA14_24040, PA14_24050, PA14_24060, PA14_24070, PA14_24080, PA14_24100	30		general secretion pathway, general secretion pathway, general secretion pathway, general secretion pathway, general secretion pathway, general secretion pathway, general secretion pathway	PA3101, PA3100, PA3099, PA3098, PA3097, PA3096, PA3095
1266	2	2092434	2092473	2092638	+	PA14_24110, PA14_24120	39		NA, NA	NA, NA
1267	1	NA	2092756	2092829	+	PA14_24130	NA		NA	NA
1268	2	NA	2093120	2095272	-	PA14_24140, PA14_24150	NA		AraC family transcriptional, hypothetical protein	PA3094, PA3093
1269	1	2095403	2095487	2097526	+	PA14_24170	84		2,4-dienoyl-CoA reductase FadH1	PA3092
1270	2	2097811	2097863	2100239	+	PA14_24180, PA14_24190	52		hypothetical protein, NA	PA3091, NA
1271	1	NA	2100240	2101205	-	PA14_24210	NA		hypothetical protein	PA3089
1272	3	NA	2101330	2104054	+	PA14_24220, PA14_24230, PA14_24240	NA		inorganic polyphosphate/ATP-NAD kinase, hypothetical protein, hypothetical protein	PA3088, PA3087, PA3086
1273	2	2104115	2104138	2105234	+	PA14_24245, PA14_24260	23		hypothetical protein, hypothetical protein	PA3085, PA3084
1274	1	2105193	2105253	2107910	+	PA14_24270	60		aminopeptidase N	PA3083
1275	2	NA	2108357	2111747	+	PA14_24290, PA14_24300	NA		glycine betaine transmethylase, hypothetical protein	PA3082, PA3081
1276	2	2111889	2111927	2115417	+	PA14_24310, PA14_24330	38		BNR/Asp-box repeat-containing protein, hypothetical protein	PA3080, PA3079
1277	2	NA	2115489	2117452	-	PA14_24340, PA14_24350	NA		putative two-component sensor, putative two-component response	PA3078, PA3077
1278	1	2117801	2117830	2120700	+	PA14_24360	29	Annotation of ORF corrected by 5' end sequencing (original ORF: 2117776..2120700)	NA	NA
1279	7	2128774	2120707	2128660	-	PA14_24370, PA14_24380, PA14_24390, PA14_24400, PA14_24410, PA14_24420, PA14_24430	114		hypothetical protein, hypothetical protein, TPR domain-containing protein, von Willebrand factor, hypothetical protein, hypothetical protein, hypothetical protein	PA3076, PA3075, PA3074, PA3073, PA3072, PA3071, PA3070
1280	1	2128958	2129153	2129770	+	PA14_24440	195		putative lipoprotein	PA3069
1281	1	2130019	2130044	2134906	+	PA14_24445	25		NAD-dependent glutamate dehydrogenase	PA3068
1282	7	2135331	2135468	2147663	+	PA14_24480, PA14_24490, PA14_24500, PA14_24510, PA14_24530, PA14_24550, PA14_24560	137		hypothetical protein, hypothetical protein, putative lipoprotein, hypothetical protein, hypothetical protein, hypothetical protein, hypothetical protein	PA3064, PA3063, PA3062, PA3061, PA3060, PA3059, PA3058
1283	1	2148059	2147704	2147934	-	PA14_24570	125		hypothetical protein	PA3057
1284	2	2147958	2148060	2149050	+	PA14_24580, PA14_24590	102		hypothetical protein, hypothetical protein	PA3056, PA3055
1285	1	NA	2149167	2151071	-	PA14_24600	NA		putative carboxypeptidase	PA3054
1286	1	2152260	2151239	2152240	-	PA14_24610	20		putative hydrolytic enzyme	PA3053
1287	1	NA	2152312	2153292	-	PA14_24620	NA		hypothetical protein	PA3052
1288	1	NA	2153286	2153567	+	PA14_24630	NA		hypothetical protein	PA3051
1289	1	2153597	2153624	2154652	+	PA14_24640	27		dihydroorotate dehydrogenase 2	PA3050
1290	1	2154979	2154740	2154952	-	PA14_24650	27		ribosome modulation factor	PA3049
1291	1	NA	2155414	2156517	+	PA14_24665	NA		NA	NA
1292	1	NA	2156561	2157592	+	PA14_24675	NA		NA	NA
1293	1	2159191	2157662	2159092	-	PA14_24690	99		putative D-alanyl-D-alanine carboxypeptidase	PA3047
1294	1	2159287	2159403	2159747	+	PA14_24700	116		hypothetical protein	PA3046
1295	2	NA	2160174	2163036	+	PA14_24710, PA14_24720	NA		putative two-component response, putative two-component sensor	PA3045, PA3044
1296	1	2164407	2163047	2164378	-	PA14_24730	29		deoxyguanosinetriphosphate	PA3043
1297	3	2165573	2164495	2165545	-	PA14_24740, PA14_24760, PA14_24770	28		hypothetical protein, hypothetical protein, hypothetical protein	PA3042, PA3041, PA3040
1298	1	NA	2165841	2167223	+	PA14_24780	NA		putative transporter	PA3039
1299	1	2168744	2167408	2168673	-	PA14_24790	71		putative outer membrane	PA3038
1300	3	2171470	2168842	2171253	-	PA14_24810, PA14_24820, PA14_24830	217		hypothetical protein, hypothetical protein, putative glutathione S-transferase	PA3037, PA3036, PA3035
1301	1	NA	2171419	2171976	+	PA14_24840	NA		putative transcriptional regulator	PA3034
1302	1	2171999	2172022	2172261	+	PA14_24850	23	Annotation of ORF corrected by 5' end sequencing (original ORF: 2171983..2172261)	hypothetical protein	PA3033
1303	1	NA	2172628	2174031	+	PA14_24860	NA		cytochrome c Snr1	PA3032
1304	1	2174172	2174092	2174165	-	PA14_24870	7		NA	NA
1305	1	2174577	2174319	2174540	-	PA14_24880	37		putative lipoprotein	PA3031
1306	1	2175287	2174672	2175268	-	PA14_24890	19		molybdopterin-guanine dinucleotide biosynthesis	PA3030
1307	2	2175307	2175335	2177088	+	PA14_24900, PA14_24910	28		molybdopterin biosynthetic protein, molybdenum cofactor biosynthesis	PA3029, PA3028
1308	1	NA	2177117	2178148	-	PA14_24920	NA		putative transcriptional regulator	PA3027
1309	3	NA	2178325	2183086	+	PA14_24940, PA14_24950, PA14_24960	NA		hypothetical protein, putative FAD-dependent glycerol-3-phosphate, putative carbohydrate kinase	PA3026, PA3025, PA3024
1310	1	NA	2183161	2184069	+	PA14_24970	NA		lipid kinase	PA3023
1311	1	2184148	2184172	2184978	+	PA14_24980	24		hypothetical protein	PA3022
1312	1	2185537	2185022	2185408	-	PA14_24990	129		hypothetical protein	PA3021
1313	1	NA	2185465	2187393	-	PA14_25000	NA		putative soluble lytic	PA3020
1314	2	NA	2187619	2190378	+	PA14_25020, PA14_25030	NA		ABC transporter ATP-binding, hypothetical protein	PA3019, PA3018
1315	1	2190983	2190408	2190845	-	PA14_25040	138		hypothetical protein	PA3017
1316	1	NA	2191053	2191487	+	PA14_25050	NA		hypothetical protein	PA3016
1317	1	2192387	2191504	2192322	-	PA14_25060	65		hypothetical protein	PA3015
1318	2	2192565	2192750	2196103	+	PA14_25080, PA14_25090	185		NA, NA	NA, NA
1319	1	2196242	2196243	2196560	+	PA14_25100	1	Annotation of ORF corrected by 5' end sequencing (original ORF: 2196186..2196560)	hypothetical protein	PA3012
1320	1	2196626	2196651	2199257	+	PA14_25110	25		DNA topoisomerase I	PA3011
1321	1	2199344	2199364	2199882	+	PA14_25130	20		hypothetical protein	PA3010
1322	1	2200066	2200088	2200321	+	PA14_25140	22		hypothetical protein	PA3009
1323	2	2201480	2200343	2201454	-	PA14_25150, PA14_25160	26		hypothetical protein, LexA repressor	PA3008, PA3007
1324	1	2201662	2201686	2202387	+	PA14_25180	24		transcriptional regulator PsrA	PA3006
1325	2	NA	2202589	2204336	+	PA14_25195, PA14_25210	NA		beta-hexosaminidase, 5'-methylthioadenosine phosphorylase	PA3005, PA3004
1326	2	2208500	2204383	2208469	-	PA14_25220, PA14_25230	31		hypothetical protein, transcription-repair coupling factor	PA3003, PA3002
1327	1	2208590	2208690	2210075	+	PA14_25250	100		glyceraldehyde-3-phosphate dehydrogenase	PA3001
1328	1	NA	2210177	2211586	+	PA14_25270	NA		aromatic amino acid	PA3000
1329	8	2211732	2211845	2218934	+	PA14_25280, PA14_25305, PA14_25320, PA14_25330, PA14_25340, PA14_25350, PA14_25360, PA14_25370	113		Na(+)-translocating NADH-quinone reductase, Na(+)-translocating NADH-quinone reductase, Na(+)-translocating NADH-quinone reductase, Na(+)-translocating NADH-quinone reductase, Na(+)-translocating NADH-quinone reductase, Na(+)-translocating NADH-quinone reductase, putative thiamine biosynthesis, hypothetical protein	PA2999, PA2998, PA2997, PA2996, PA2995, PA2994, PA2993, PA2992
1330	1	2219033	2219113	2220507	+	PA14_25390	80		soluble pyridine nucleotide	PA2991
1331	3	NA	2220550	2222351	-	PA14_25400, PA14_25410, PA14_25420	NA		putative phosphodiesterase, NA, hypothetical protein	PA2990, NA, PA2989
1332	3	NA	2222289	2225529	+	PA14_25430, PA14_25440, PA14_25450	NA		hypothetical protein, putative lipoprotein releasing, hypothetical protein	PA2988, PA2987, PA2986
1333	1	NA	2225617	2226150	-	PA14_25470	NA		hypothetical protein	PA2985
1334	1	2226192	2226281	2228506	+	PA14_25480	89		putative competence protein	PA2984
1335	3	2228554	2228579	2230649	+	PA14_25490, PA14_25500, PA14_25510	25		putative tolQ-type transport, hypothetical protein, tetraacyldisaccharide 4'-kinase	PA2983, PA2982, PA2981
1336	4	2230601	2230687	2233116	+	PA14_25520, PA14_25530, PA14_25540, PA14_25550	86		hypothetical protein, 3-deoxy-manno-octulosonate, phosphotyrosine protein phosphatase, UDP-N-acetylenolpyruvoylglucosamine reductase	PA2980, PA2979, PA2978, PA2977
1337	1	2236725	2233274	2236447	-	PA14_25560	278		ribonuclease E	PA2976
1338	3	2237024	2237024	2239638	+	PA14_25580, PA14_25590, PA14_25600	0		ribosomal large subunit, putative hydrolase, putative peptidase	PA2975, PA2974, PA2973
1339	1	2240318	2239721	2240299	-	PA14_25610	19		Maf-like protein	PA2972
1340	1	2240407	2240409	2240945	+	PA14_25620	2		hypothetical protein	PA2971
1341	1	2240825	2240959	2241141	+	PA14_25630	134		50S ribosomal protein	PA2970
1342	1	NA	2241175	2242155	+	PA14_25640	NA		putative glycerol-3-phosphate acyltransferase	PA2969
1343	1	2242193	2242261	2243199	+	PA14_25650	68		malonyl-CoA-[acyl-carrier-protein]	PA2968
1344	1	2243141	2243222	2243965	+	PA14_25660	81		NA	NA
1345	1	2244136	2244161	2244397	+	PA14_25670	25		acyl carrier protein	PA2966
1346	5	2244493	2244526	2249280	+	PA14_25690, PA14_25710, PA14_25730, PA14_25740, PA14_25760	33		3-oxoacyl-(acyl carrier protein), 4-amino-4-deoxychorismate lyase, hypothetical protein, thymidylate kinase, DNA polymerase III	PA2965, PA2964, PA2963, PA2962, PA2961
1347	2	2249291	2249314	2250461	+	PA14_25770, PA14_25780	23		type 4 fimbrial, TatD family deoxyribonuclease	PA2960, PA2959
1348	1	NA	2250687	2251820	-	PA14_25790	NA		hypothetical protein	PA2958
1349	1	2251869	2251906	2252544	+	PA14_25800	37		TetR family transcriptional	PA2957
1350	3	2252615	2252711	2254866	+	PA14_25810, PA14_25820, PA14_25830	96		hypothetical protein, putative lipoprotein, hypothetical protein	PA2956, PA2955, PA2954
1351	1	2256638	2254915	2256570	-	PA14_25840	68		electron transfer flavoprotein-ubiquinone	PA2953
1352	2	2256785	2256891	2258569	+	PA14_25860, PA14_25880	106		electron transfer flavoprotein, electron transfer flavoprotein	PA2952, PA2951
1353	1	2258704	2258754	2259950	+	PA14_25900	50		trans-2-enoyl-CoA reductase	PA2950
1354	1	NA	2260023	2260970	-	PA14_25910	NA		putative lipase	PA2949
1355	2	NA	2261099	2262276	-	PA14_25920, PA14_25930	NA		precorrin-3 methylase, hypothetical protein	PA2948, PA2947
1356	1	2263493	2262349	2263443	-	PA14_25940	50	The 5' UTR contains a cobalamin riboswitch (RF00174)	hypothetical protein	PA2946
1357	1	2263575	2263799	2264926	+	PA14_25960	224	The 5' UTR contains a cobalamin riboswitch (RF00174)	putative cobalamin biosynthesis	PA2945
1358	1	NA	2265002	2268748	+	PA14_25970	NA		NA	NA
1359	1	2270074	2268777	2269871	-	PA14_25980	203		phospho-2-dehydro-3-deoxyheptonate aldolase	PA2943
1360	3	2270409	2270442	2273381	+	PA14_25990, PA14_26000, PA14_26010	33		putative magnesium chelatase, putative magnesium chelatase, acyl-CoA thiolase	PA2942, PA2941, PA2940
1361	1	2275163	2273468	2275078	-	PA14_26020	85		putative aminopeptidase	PA2939
1362	1	2275479	2275579	2277036	+	PA14_26050	100		putative transporter	PA2938
1363	1	NA	2277092	2277400	-	PA14_26060	NA		hypothetical protein	PA2937
1364	1	NA	2277496	2278077	-	PA14_26070	NA		hypothetical protein	PA2936
1365	1	NA	2278467	2278667	+	PA14_26080	NA		NA	NA
1366	3	NA	2278687	2282021	-	PA14_26090, PA14_26110, PA14_26130	NA		putative hydrolase, putative MFS transporter, morphinone reductase	PA2934, PA2933, PA2932
1367	1	2282091	2282147	2282737	+	PA14_26140	56		putative transcriptional regulator	PA2931
1368	1	NA	2282748	2283674	-	PA14_26150	NA		putative transcriptional regulator	PA2930
1369	2	NA	2283740	2285985	+	PA14_26160, PA14_26165	NA		hypothetical protein, hypothetical protein	PA2929, PA2928
1370	1	2287390	2286036	2287367	-	PA14_26190	23		hypothetical protein	PA2927
1371	1	NA	2287497	2287679	+	PA14_26200	NA		NA	NA
1372	5	NA	2287689	2291946	-	PA14_26210, PA14_26220, PA14_26230, PA14_26240, PA14_26260	NA		ATP-binding component of, histidine ABC transporter,, histidine transport system, periplasmic histidine-binding protein, putative hydrolase	PA2926, PA2925, PA2924, PA2923, PA2922
1373	1	2292058	2292083	2293036	+	PA14_26270	25	Annotation of ORF corrected by 5' end sequencing (original ORF: 2292047..2293036)	putative transcriptional regulator	PA2921
1374	1	2293042	2293121	2294758	+	PA14_26280	79		putative chemotaxis transducer	PA2920
1375	2	NA	2294770	2295854	-	PA14_26300, PA14_26310	NA		hypothetical protein, short chain dehydrogenase	PA2919, PA2918
1376	1	2296031	2296065	2296901	+	PA14_26330	34		AraC family transcriptional	PA2917
1377	1	NA	2296952	2297545	+	PA14_26340	NA		hypothetical protein	PA2916
1378	1	NA	2297665	2298531	+	PA14_26350	NA		hypothetical protein	PA2915
1379	3	NA	2298532	2301301	-	PA14_26360, PA14_26390, PA14_26400	NA		putative permease of, hypothetical protein, putative ATP-binding component	PA2914, PA2913, PA2912
1380	1	2303857	2301354	2303510	-	PA14_26420	347	The 5' UTR contains a cobalamin riboswitch (RF00174)	putative TonB-dependent receptor	PA2911
1381	1	2303978	2304147	2304716	+	PA14_26450	169	The 5'UTR contains a yybP-ykoY riboswitch (RF00080)	hypothetical protein	PA2910
1382	3	NA	2304770	2307835	-	PA14_26460, PA14_26470, PA14_26480	NA		ion, one aerobic, cobalt-precorrin-6A synthase, precorrin-6y-dependent methyltransferase CobL	PA2909, PA2908, PA2907
1383	4	2307932	2308172	2312676	+	PA14_26485, PA14_26500, PA14_26510, PA14_26530	240	The 5'UTR contains a cobalamin riboswitch (RF00174)	putative oxidoreductase, precorrin-8X methylmutase, precorrin-2 C(20)-methyltransferase, precorrin-3 methylase CobJ	PA2906, PA2905, PA2904, PA2903
1384	2	2312718	2312746	2313950	+	PA14_26540, PA14_26550	28		hypothetical protein, putative lipoprotein	PA2902, PA2901
1385	1	2313857	2313950	2314759	+	PA14_26560	93		putative outer membrane	PA2900
1386	1	NA	2314953	2315591	+	PA14_26570	NA		putative transcriptional regulator	PA2899
1387	1	NA	2315677	2316045	+	PA14_26580	NA		hypothetical protein	PA2898
1388	1	2316244	2316267	2317706	+	PA14_26590	23		GntR family transcriptional	PA2897
1389	2	NA	2318037	2319382	+	PA14_26600, PA14_26610	NA		RNA polymerase sigma, hypothetical protein	PA2896, PA2895
1390	1	2319538	2319728	2320150	+	PA14_26620	190		hypothetical protein	PA2894
1391	1	NA	2320164	2321990	-	PA14_26640	NA		acyl-CoA synthetase	PA2893
1392	1	NA	2322153	2322977	-	PA14_26650	NA		short chain dehydrogenase	PA2892
1393	1	NA	2323029	2325014	-	PA14_26670	NA		putative biotin carboxylase/biotin	PA2891
1394	2	NA	2325060	2327035	-	PA14_26690, PA14_26700	NA		putative enoyl-CoA hydratase/isomerase, putative acyl-CoA dehydrogenase	PA2890, PA2889
1395	2	NA	2327152	2329648	-	PA14_26720, PA14_26730	NA		putative biotin-dependent carboxylase, putative short-chain dehydrogenase	PA2888, PA2887
1396	1	NA	2329721	2331523	-	PA14_26750	NA		hypothetical protein	PA2886
1397	1	2331663	2331804	2332400	+	PA14_26760	141		putative transcriptional regulator	PA2885
1398	1	NA	2332401	2333165	-	PA14_26770	NA		hypothetical protein	PA2884
1399	1	2333588	2333398	2333565	-	PA14_26780	23		hypothetical protein	PA2883
1400	2	NA	2333988	2336016	+	PA14_26810, PA14_26830	NA		putative two-component sensor, putative two-component response	PA2882, PA2881
1401	1	NA	2336025	2336540	-	PA14_26850	NA		hypothetical protein	PA2880
1402	1	NA	2336587	2337477	+	PA14_26860	NA		LysR family transcriptional	PA2879
1403	1	NA	2337500	2338141	-	PA14_26870	NA		hypothetical protein	PA2878
1404	1	NA	2338187	2339080	+	PA14_26880	NA		LysR family transcriptional	PA2877
1405	1	2339151	2339177	2339875	+	PA14_26890	26		orotidine 5'-phosphate decarboxylase	PA2876
1406	3	NA	2340124	2344000	+	PA14_26910, PA14_26920, PA14_26930	NA		hypothetical protein, hypothetical protein, transglutaminase-like domain-containing	PA2875, PA2874, PA2873
1407	1	NA	2343997	2344767	+	PA14_26940	NA		hypothetical protein	PA2872
1408	1	NA	2344848	2345645	+	PA14_26960	NA		hypothetical protein	PA2871
1409	2	NA	2345654	2347729	-	PA14_26970, PA14_26980	NA		hypothetical protein, hypothetical protein	PA2870, PA2869
1410	1	NA	2347816	2348175	-	PA14_26990	NA		hypothetical protein	PA2868
1411	1	2349811	2348301	2349773	-	PA14_27000	38		putative chemotaxis transducer	PA2867
1412	1	2350805	2349912	2350715	-	PA14_27020	90		secretion protein MttC	PA2866
1413	1	2350725	2350962	2352392	+	PA14_27050	237		Slt family transglycosylase	PA2865
1414	1	2352464	2352491	2352925	+	PA14_27070	27		hypothetical protein	PA2864
1415	1	NA	2353093	2353959	-	PA14_27090	NA		lipase chaperone	PA2863
1416	1	2355181	2354166	2355101	-	PA14_27100	80		lactonizing lipase precursor	PA2862
1417	1	NA	2355297	2355845	-	PA14_27110	NA		2'-5' RNA ligase	PA2861
1418	1	NA	2355899	2356339	+	PA14_27120	NA		hypothetical protein	PA2860
1419	1	2356892	2356352	2356858	-	PA14_27130	34		transcription elongation factor	PA2859
1420	2	2360182	2356910	2360094	-	PA14_27140, PA14_27150	88		hypothetical protein, ABC transporter ATP-binding	PA2858, PA2857
1421	1	NA	2360105	2360710	+	PA14_27160	NA		acyl-CoA thioesterase I	PA2856
1422	1	NA	2360766	2361044	+	PA14_27170	NA		hypothetical protein	PA2855
1423	1	2361085	2361122	2362093	+	PA14_27180	37		hypothetical protein	PA2854
1424	1	2362540	2362150	2362468	-	PA14_NovelOrf_009	72	TU contains unannotated ORF	Unannotated ORF	PA14_NovelOrf_009
1425	1	2362974	2362888	2362974	-	PA14_27190	0		NA	NA
1426	1	2363113	2363130	2364260	+	PA14_27200	17		hypothetical protein	PA2852
1427	1	2364268	2364303	2364869	+	PA14_27210	35		elongation factor P	PA2851
1428	1	NA	2364957	2365385	-	PA14_27220	NA		organic hydroperoxide resistance	PA2850
1429	1	NA	2365530	2365985	-	PA14_27230	NA		MarR family transcriptional	PA2849
1430	1	NA	2366071	2367090	-	PA14_27250	NA		LysR family transcriptional	PA2848
1431	1	2367110	2367128	2367877	+	PA14_27270	18		hypothetical protein	PA2847
1432	1	2368773	2367879	2368733	-	PA14_27280	40		LysR family transcriptional	PA2846
1433	1	2368808	2368830	2369063	+	PA14_27290	22		hypothetical protein	PA2845
1434	1	NA	2369146	2370354	+	PA14_27310	NA		hypothetical protein	PA2844
1435	1	2371774	2370395	2371741	-	PA14_27330	33		putative phospho-2-dehydro-3-deoxyheptonate	PA2843
1436	1	2371866	2371917	2372666	+	PA14_27350	51		hypothetical protein	PA2842
1437	1	2373699	2372693	2373484	-	PA14_27360	215		enoyl-CoA hydratase	PA2841
1438	1	NA	2373795	2375498	+	PA14_27370	NA		ATP-dependent RNA helicase	PA2840
1439	1	NA	2375865	2376635	-	PA14_27390	NA		hypothetical protein	PA2839
1440	4	NA	2376726	2381838	-	PA14_27400, PA14_27410, PA14_27420, PA14_27430	NA		LysR family transcriptional, putative outer membrane, putative secretion protein, putative multidrug efflux	PA2838, PA2837, PA2836, PA2835
1441	1	NA	2381976	2382941	-	PA14_27440	NA		putative transcriptional regulator	PA2834
1442	1	NA	2383065	2383511	+	PA14_27450	NA		hypothetical protein	PA2833
1443	1	2383542	2383567	2384223	+	PA14_27460	25		thiopurine S-methyltransferase	PA2832
1444	1	2385408	2384255	2385382	-	PA14_27470	26		putative zinc carboxypeptidase	PA2831
1445	1	2386481	2385522	2386397	-	PA14_27480	84		heat shock protein	PA2830
1446	1	2387057	2386531	2386983	-	PA14_27490	74		hypothetical protein	PA2829
1447	1	2388354	2387034	2388245	-	PA14_27500	109		aminotransferase AlaT	PA2828
1448	1	2388349	2388430	2388828	+	PA14_27510	81		methionine sulfoxide reductase	PA2827
1449	2	2388911	2388940	2389913	+	PA14_27520, PA14_27530	29		putative glutathione peroxidase, MarR family transcriptional	PA2826, PA2825
1450	1	2392280	2389932	2392250	-	PA14_27550	30	Annotation of ORF corrected by 5' end sequencing (original ORF: 2389932..2392292)	putative sensor/response regulator	PA2824
1451	2	2392152	2392375	2393744	+	PA14_27560, PA14_27570	223		hypothetical protein, GAF domain-containing protein	PA2823, PA2822
1452	1	2394437	2393754	2394416	-	PA14_27580	21		putative glutathione S-transferase	PA2821
1453	1	2395273	2394478	2395251	-	PA14_27590	22		hypothetical protein	PA2820
1454	2	2395469	2395469	2395619	+	PA14_27600, PA14_27610	0		NA, NA	NA, NA
1455	1	2395707	2395707	2395779	+	PA14_27620	0		NA	NA
1456	2	2396738	2395992	2396695	-	PA14_27630, PA14_27640	43		NA, NA	NA, NA
1457	2	2397754	2396846	2397684	-	PA14_27650, PA14_27660	70		NA, NA	NA, NA
1458	2	NA	2397913	2400737	-	PA14_27675, PA14_27680	NA		NA, NA	NA, NA
1459	1	NA	2401079	2401672	-	PA14_27690	NA		NA	NA
1460	1	NA	2401738	2402463	-	PA14_27700	NA		NA	NA
1461	1	2403158	2402727	2403137	-	PA14_27710	21		hypothetical protein	PA2817
1462	1	NA	2403196	2403576	-	PA14_27720	NA		hypothetical protein	PA2816
1463	1	2406334	2403705	2406152	-	PA14_27730	182		acyl-CoA dehydrogenase	PA2815
1464	1	NA	2406305	2406976	+	PA14_27740	NA		hypothetical protein	PA2814
1465	3	NA	2407091	2409495	+	PA14_27755, PA14_27770, PA14_27780	NA		glutathione S-transferase, ABC transporter ATP-binding, putative ABC transporter,	PA2813, PA2812, PA2811
1466	2	NA	2409545	2411553	-	PA14_27800, PA14_27810	NA		putative two-component sensor, putative two-component response	PA2810, PA2809
1467	1	NA	2411679	2411870	+	PA14_27830	NA		hypothetical protein	PA2808
1468	1	NA	2412042	2412659	+	PA14_27840	NA		hypothetical protein	PA2807
1469	1	NA	2412777	2413607	+	PA14_27850	NA		7-cyano-7-deazaguanine reductase	PA2806
1470	1	2413959	2413674	2413937	-	PA14_27870	22		hypothetical protein	PA2805
1471	2	NA	2414011	2415332	-	PA14_27880, PA14_27890	NA		hypothetical protein, hypothetical protein	PA2804, PA2803
1472	1	NA	2415466	2416185	+	PA14_27900	NA		putative transcriptional regulator	PA2802
1473	1	NA	2416187	2416591	-	PA14_27910	NA		hypothetical protein	PA2801
1474	1	2416642	2416694	2417398	+	PA14_27920	52		hypothetical protein	PA2800
1475	1	2417810	2417456	2417755	-	PA14_27930	55		hypothetical protein	PA2799
1476	2	2417916	2418001	2419664	+	PA14_27940, PA14_27950	85		putative two-component response, hypothetical protein	PA2798, PA2797
1477	1	2420711	2419750	2420673	-	PA14_27960	38		transaldolase B	PA2796
1478	1	2421780	2420753	2421751	-	PA14_27980	29		tRNA-dihydrouridine synthase A	PA2795
1479	1	2421844	2422054	2423370	+	PA14_27990	210		putative sialidase	PA2794
1480	1	2423773	2423812	2424852	+	PA14_28000	39		hypothetical protein	PA2793
1481	1	NA	2424932	2425528	+	PA14_28010	NA		hypothetical protein	PA2792
1482	1	NA	2425622	2425912	+	PA14_28020	NA		hypothetical protein	PA2791
1483	1	2426461	2426013	2426390	-	PA14_28030	71	Annotation of ORF corrected by 5' end sequencing (original ORF: 2426013..2426498)	hypothetical protein	PA2790
1484	1	NA	2426933	2428012	-	PA14_28040	NA		hypothetical protein	PA2789
1485	1	2428224	2428256	2429851	+	PA14_28050	32		putative chemotaxis transducer	PA2788
1486	1	2431162	2429873	2431111	-	PA14_28060	51		glutamate carboxypeptidase	PA2787
1487	1	NA	2431178	2431645	-	PA14_28070	NA		hypothetical protein	PA2786
1488	2	NA	2431760	2432544	-	PA14_28080, PA14_28090	NA		putative transcriptional regulator, hypothetical protein	PA2785, PA2784
1489	1	NA	2432715	2434523	-	PA14_28100	NA		hypothetical protein	PA2783
1490	1	NA	2434601	2435260	-	PA14_28110	NA		hypothetical protein	PA2782
1491	2	2436449	2435738	2436420	-	PA14_28120, PA14_28130	29		hypothetical protein, hypothetical protein	PA2781, PA2780
1492	3	2436758	2436828	2439226	+	PA14_28140, PA14_28150, PA14_28170	70		hypothetical protein, hypothetical protein, formate/nitrate transporter	PA2779, PA2778, PA2777
1493	1	2440591	2439277	2440560	-	PA14_28180	31		hypothetical protein	PA2776
1494	1	2440744	2440744	2440817	+	PA14_28190	0		NA	NA
1495	2	NA	2441012	2442041	+	PA14_28200, PA14_28210	NA		hypothetical protein, hypothetical protein	PA2775, PA2774
1496	1	NA	2442240	2442761	+	PA14_28220	NA		hypothetical protein	PA2773
1497	1	NA	2442781	2442951	-	PA14_28230	NA		NA	NA
1498	1	NA	2443112	2443336	+	PA14_28240	NA		NA	NA
1499	1	2444391	2443370	2444275	-	PA14_28250	116	Annotation of ORF corrected by 5' end sequencing (original ORF: 2443370..2444509)	NA	NA
1500	1	2444495	2444516	2444812	+	PA14_28260	21		NA	NA
1501	2	2444890	2444914	2446125	+	PA14_28280, PA14_28290	24		PhzF family phenazine, hypothetical protein	PA2770, PA2769
1502	2	NA	2446265	2447721	-	PA14_28300, PA14_28310	NA		hypothetical protein, putative enoyl-CoA hydratase	PA2768, PA2767
1503	1	NA	2447809	2448390	+	PA14_28320	NA		TetR family transcriptional	PA2766
1504	1	NA	2448449	2448544	+	PA14_28330	NA		NA	NA
1505	1	2448621	2448732	2449631	+	PA14_28340	111		hypothetical protein	PA2765
1506	1	NA	2449679	2450374	-	PA14_28350	NA		hypothetical protein	PA2764
1507	1	2450540	2450705	2450914	+	PA14_28360	165		NA	NA
1508	1	2451226	2450961	2451159	-	PA14_NovelOrf_010	67	TU contains unannotated ORF	Unannotated ORF	PA14_NovelOrf_010
1509	1	2451208	2451388	2451597	+	PA14_28370	180		hypothetical protein	PA2763
1510	1	NA	2451709	2452053	+	PA14_28380	NA		hypothetical protein	PA2762
1511	1	NA	2452096	2452512	-	PA14_28390	NA		hypothetical protein	PA2761
1512	1	2454029	2452624	2453901	-	PA14_28400	128		outer membrane OprD	PA2760
1513	1	2454237	2454266	2454580	+	PA14_28410	29		hypothetical protein	PA2759
1514	1	NA	2454791	2455678	-	PA14_28420	NA		LysR family transcriptional	PA2758
1515	1	NA	2455781	2456224	+	PA14_28430	NA		hypothetical protein	PA2757
1516	1	2456290	2456363	2456797	+	PA14_28440	73		hypothetical protein	PA2756
1517	1	2457347	2456849	2457319	-	PA14_28450	28		ecotin	PA2755
1518	1	2457922	2457668	2457898	-	PA14_28460	24		NA	NA
1519	1	NA	2458077	2458274	+	PA14_28470	NA		NA	NA
1520	2	2459192	2458340	2459154	-	PA14_28490, PA14_28500	38		hypothetical protein, hypothetical protein	PA2754, PA2753
1521	2	NA	2459289	2460205	+	PA14_28510, PA14_28520	NA		hypothetical protein, NA	PA2752, NA
1522	1	2461186	2460195	2461094	-	PA14_28530	92		hypothetical protein	PA2751
1523	1	NA	2461317	2461550	+	PA14_28540	NA		NA	NA
1524	2	NA	2461821	2463071	-	PA14_28560, PA14_28570	NA		hypothetical protein, DNA-specific endonuclease I	PA2750, PA2749
1525	2	2463201	2463228	2464228	+	PA14_28580, PA14_28590	27		NA, putative methionine aminopeptidase	NA, PA2748
1526	1	2464658	2464714	2465001	+	PA14_28600	56		hypothetical protein	PA2747
1527	1	2465518	2465327	2465503	-	PA14_28610	15		NA	NA
1528	1	2465935	2465588	2465914	-	PA14_28620	21		hypothetical protein	PA2746
1529	1	NA	2466106	2466969	+	PA14_28630	NA		putative hydrolase	PA2745
1530	1	2467029	2467219	2469141	+	PA14_28650	190		threonyl-tRNA synthetase	PA2744
1531	1	2468967	2469159	2469692	+	PA14_28660	192		translation initiation factor	PA2743
1532	2	2469444	2469754	2470328	+	PA14_28670, PA14_28680	310	The 5'UTR contains a LR-PK element (RF01086)	50S ribosomal protein, 50S ribosomal protein	PA2742, PA2741
1533	2	NA	2470426	2473855	+	PA14_28690, PA14_28710	NA		phenylalanyl-tRNA synthetase subunit, phenylalanyl-tRNA synthetase subunit	PA2740, PA2739
1534	2	2473781	2473859	2474498	+	PA14_28720, PA14_28730	78		NA, putative transcriptional regulator	NA, PA2737
1535	1	2474588	2474588	2474661	+	PA14_28740	0		NA	NA
1536	1	NA	2474825	2475199	-	PA14_28750	NA		NA	NA
1537	1	2475979	2475474	2475824	-	PA14_28760	155	Annotation of ORF corrected by 5' end sequencing (original ORF: 2475474..2476088)	NA	NA
1538	1	2476414	2476671	2478314	+	PA14_28770	257		NA	NA
1539	2	2478696	2478704	2479136	+	PA14_28780, PA14_28790	8	Annotation of ORF corrected by 5' end sequencing (original ORF: 2478590..2478874)	NA, NA	NA, NA
1540	1	2479258	2479279	2480274	+	PA14_28800	21		NA	NA
1541	1	2480343	2480409	2485532	+	PA14_28810	66		NA	NA
1542	3	2485607	2485638	2491613	+	PA14_28820, PA14_28830, PA14_28840	31		NA, NA, NA	NA, NA, NA
1543	2	2491645	2491674	2492317	+	PA14_28850, PA14_28870	29		NA, NA	NA, NA
1544	4	2502725	2492593	2502719	-	PA14_28880, PA14_28895, PA14_28910, PA14_28920	6	Annotation of ORF corrected by 5' end sequencing (original ORF: 2500890..2502773)	hypothetical protein, NA, putative radical activating, putative chaperone	PA2729, NA, PA2726, PA2725
1545	2	2503807	2502850	2503745	-	PA14_28930, PA14_28940	62		hypothetical protein, hypothetical protein	PA2724, PA2723
1546	2	NA	2503775	2504678	-	PA14_28950, PA14_28960	NA		hypothetical protein, hypothetical protein	PA2722, PA2721
1547	2	NA	2504847	2506324	+	PA14_28970, PA14_28980	NA		NA, NA	NA, NA
1548	1	2506681	2506753	2507391	+	PA14_28990	72		hypothetical protein	PA2720
1549	1	NA	2507551	2508237	-	PA14_29000	NA		hypothetical protein	PA2719
1550	1	NA	2508337	2508825	-	PA14_29010	NA		MerR family transcriptional	PA2718
1551	1	NA	2509058	2509888	+	PA14_29020	NA		chloroperoxidase precursor	PA2717
1552	1	NA	2510015	2511250	+	PA14_29030	NA		putative FMN oxidoreductase	PA2716
1553	2	NA	2511265	2513929	-	PA14_29040, PA14_29050	NA		putative ferredoxin, putative molybdopterin oxidoreductase	PA2715, PA2714
1554	1	NA	2514283	2514762	+	PA14_29060	NA		putative transcriptional regulator	PA2713
1555	1	2515876	2514810	2515673	-	PA14_29070	203		hypothetical protein	PA2712
1556	1	2515994	2515840	2515967	-	PA14_NovelOrf_011	27	TU contains unannotated ORF	Unannotated ORF	PA14_NovelOrf_011
1557	1	NA	2516093	2517184	-	PA14_29090	NA		putative periplasmic	PA2711
1558	2	2519058	2517383	2519030	-	PA14_29100, PA14_29110	28		hypothetical protein, cysteine synthase A	PA2710, PA2709
1559	1	NA	2519151	2520236	+	PA14_29120	NA		hypothetical protein	PA2708
1560	3	2520335	2520399	2522934	+	PA14_29130, PA14_29150, PA14_29160	64		ATPase, hypothetical protein, hypothetical protein	PA2707, PA2706, PA2705
1561	1	NA	2523048	2524067	+	PA14_29180	NA		AraC family transcriptional	PA2704
1562	2	NA	2524349	2525068	-	PA14_29190, PA14_29200	NA		hypothetical protein, hypothetical protein	PA2703, PA2702
1563	3	NA	2525215	2530001	-	PA14_29210, PA14_29220, PA14_29230	NA		putative MFS transporter, putative porin, hypothetical protein	PA2701, PA2700, PA2699
1564	1	NA	2530609	2531289	+	PA14_29240	NA		putative hydrolase	PA2698
1565	1	NA	2531346	2531627	+	PA14_29250	NA		hypothetical protein	PA2697
1566	1	2531721	2531797	2532690	+	PA14_29260	76		putative transcriptional regulator	PA2696
1567	2	2532751	2532804	2534314	+	PA14_29270, PA14_29280	53		putative outer membrane, putative thioredoxin	PA2695, PA2694
1568	1	2534911	2534342	2534842	-	PA14_29290	69		hypothetical protein	PA2693
1569	1	NA	2535012	2535536	-	PA14_29300	NA		putative transcriptional regulator	PA2692
1570	1	2535754	2535805	2537010	+	PA14_29320	51		putative NADH dehydrogenase,	PA2691
1571	1	2538192	2537045	2538037	-	PA14_29330	155		NA	NA
1572	4	NA	2538496	2543870	-	PA14_29340, PA14_29350, PA14_29360, PA14_29375	NA		hypothetical protein, outer membrane receptor, two-component sensor PfeS, NA	PA2689, PA2688, PA2687, NA
1573	2	2543955	2544083	2550155	+	PA14_29390, PA14_29400	128		hypothetical protein, hypothetical protein	PA2685, PA2684
1574	1	NA	2550506	2551468	+	PA14_29410	NA		serine/threonine dehydratase	PA2683
1575	1	2552774	2551476	2552717	-	PA14_29420	57		hypothetical protein	PA2682
1576	2	NA	2552900	2554826	-	PA14_29440, PA14_29460	NA		LysR family transcriptional, putative quinone oxidoreductase	PA2681, PA2680
1577	1	2554997	2555052	2555804	+	PA14_29470	55		hypothetical protein	PA2679
1578	10	NA	2556397	2564671	+	PA14_29480, PA14_29490, PA14_29500, PA14_29510, PA14_29520, PA14_29530, PA14_29540, PA14_29550, PA14_29560, PA14_29570	NA		putative permease of, putative type II, putative type II, putative type II, type II secretion, type II secretion, putative type II, hypothetical protein, hypothetical protein, hypothetical protein	PA2678, PA2677, PA2676, PA2675, PA2674, PA2673, PA2672, PA2671, PA2670, PA2669
1579	1	2564926	2564935	2565231	+	PA14_29575	9	Annotation of ORF corrected by 5' end sequencing (original ORF: 2564914..2565231)	NA	NA
1580	1	2565736	2565307	2565660	-	PA14_29590	76		putative transcriptional regulator	PA2667
1581	1	2566368	2565968	2566324	-	PA14_29600	44		putative 6-pyruvoyl-tetrahydropterin synthase	PA2666
1582	1	2568015	2566425	2567978	-	PA14_29620	37		anaerobic nitric oxide	PA2665
1583	1	NA	2568133	2569314	+	PA14_29640	NA		nitric oxide dioxygenase	PA2664
1584	2	2569268	2569368	2570805	+	PA14_29650, PA14_29660	100		hypothetical protein, hypothetical protein	PA2663, PA2662
1585	2	2573079	2571056	2573058	-	PA14_29680, PA14_29690	21		hypothetical protein, hypothetical protein	PA2661, PA2660
1586	4	2573214	2573273	2575900	+	PA14_29710, PA14_29720, PA14_29730, PA14_29740	59		hypothetical protein, hypothetical protein, putative two-component response, putative two-component sensor	PA2659, PA2658, PA2657, PA2656
1587	1	NA	2575991	2576299	+	PA14_29750	NA		hypothetical protein	PA2655
1588	1	NA	2576304	2578448	-	PA14_29760	NA		putative chemotaxis transducer	PA2654
1589	1	NA	2578707	2580032	+	PA14_29770	NA		putative transporter	PA2653
1590	2	2580111	2580146	2583049	+	PA14_29800, PA14_29820	35		putative chemotaxis transducer, hypothetical protein	PA2652, PA2651
1591	1	NA	2583256	2584065	-	PA14_29830	NA		putative methyltransferase	PA2650
1592	8	2594232	2584180	2594184	-	PA14_29850, PA14_29860, PA14_29880, PA14_29890, PA14_29900, PA14_29920, PA14_29930, PA14_29940	48		NADH dehydrogenase subunit, NADH dehydrogenase subunit, NADH dehydrogenase subunit, NADH dehydrogenase subunit, NADH dehydrogenase subunit, NADH dehydrogenase subunit, NADH dehydrogenase subunit, NADH dehydrogenase subunit	PA2649, PA2648, PA2647, PA2646, PA2645, PA2644, PA2643, PA2642
1593	4	2598819	2594316	2598703	-	PA14_29970, PA14_29980, PA14_29990, PA14_30010	116		NADH dehydrogenase I, NADH dehydrogenase subunit, bifunctional NADH:ubiquinone oxidoreductase, NADH dehydrogenase subunit	PA2641, PA2640, PA2639, PA2638
1594	1	2599230	2598714	2599127	-	PA14_30020	103		NADH dehydrogenase subunit	PA2637
1595	1	NA	2599727	2600281	-	PA14_30030	NA		hypothetical protein	PA2636
1596	1	NA	2600360	2602378	-	PA14_30040	NA		hypothetical protein	PA2635
1597	1	2604546	2602558	2604153	-	PA14_30050	393		isocitrate lyase	PA2634
1598	3	2606653	2604748	2606618	-	PA14_30070, PA14_30080, PA14_30090	35		hypothetical protein, hypothetical protein, putative acetyl transferase	PA2633, PA2632, PA2631
1599	2	2609247	2606611	2609210	-	PA14_30100, PA14_30110	37		hypothetical protein, adenylosuccinate lyase	PA2630, PA2629
1600	1	NA	2609286	2610176	-	PA14_30130	NA		hypothetical protein	PA2628
1601	2	2611956	2610179	2611923	-	PA14_30140, PA14_30150	33		hypothetical protein, NA	PA2627, NA
1602	1	NA	2611967	2612437	-	PA14_30160	NA		hypothetical protein	PA2625
1603	1	2614972	2612524	2614749	-	PA14_30180	223		monomeric isocitrate dehydrogenase	PA2624
1604	1	2615083	2615108	2616364	+	PA14_30190	25		isocitrate dehydrogenase	PA2623
1605	1	2616819	2616438	2616710	-	PA14_30200	109		cold-shock protein CspD	PA2622
1606	2	NA	2616936	2619608	+	PA14_30210, PA14_30230	NA		ATP-dependent Clp protease, ATP-dependent Clp protease,	PA2621, PA2620
1607	1	2619969	2619690	2619908	-	PA14_30240	61		translation initiation factor	PA2619
1608	1	NA	2620013	2620720	-	PA14_30260	NA		arginyl-tRNA-protein transferase	PA2618
1609	2	2622474	2620775	2622443	-	PA14_30270, PA14_30280	31		leucyl/phenylalanyl-tRNA--protein transferase, thioredoxin reductase 1	PA2617, PA2616
1610	2	2622638	2622671	2625758	+	PA14_30290, PA14_30310	33		cell division protein, outer-membrane lipoprotein carrier	PA2615, PA2614
1611	1	2625630	2625768	2627093	+	PA14_30320	138		recombination factor protein	PA2613
1612	2	2627195	2627215	2629894	+	PA14_30330, PA14_30340	20		seryl-tRNA synthetase, siroheme synthase	PA2612, PA2611
1613	1	2630897	2629899	2630873	-	PA14_30350	24		hypothetical protein	PA2610
1614	1	2632009	2630961	2631944	-	PA14_30360	65		hypothetical protein	PA2609
1615	4	2633350	2631941	2633329	-	PA14_30370, PA14_30380, PA14_30390, PA14_30400	21		hypothetical protein, hypothetical protein, sulfur relay protein, sulfur transfer complex	PA2608, PA2607, PA2606, PA2605
1616	1	2634149	2633440	2634108	-	PA14_30410	41		hypothetical protein	PA2604
1617	1	2634238	2634238	2634324	+	PA14_30420	0		NA	NA
1618	2	2636711	2634462	2636647	-	PA14_30430, PA14_30440	64		thiosulfate sulfurtransferase, putative enzyme	PA2603, PA2602
1619	1	NA	2636760	2637656	+	PA14_30450	NA		LysR family transcriptional	PA2601
1620	4	NA	2637996	2642265	+	PA14_30460, PA14_30470, PA14_30490, PA14_30500	NA		putative flavin-dependent oxidoreductase, putative periplasmic aliphatic, putative lavin-dependent oxidoreductase, putative acyl-CoA dehydrogenase	PA2600, PA2599, PA2598, PA2597
1621	2	NA	2642373	2644327	+	PA14_30520, PA14_30540	NA		putative periplasmic aliphatic, putative periplasmic aliphatic	PA2596, PA2595
1622	1	NA	2644483	2645442	+	PA14_30550	NA		putative periplasmic aliphatic	PA2594
1623	1	2646243	2645509	2646081	-	PA14_30560	162		hypothetical protein	PA2593
1624	1	2647477	2646291	2647394	-	PA14_30570	83		putative periplasmic	PA2592
1625	1	2647496	2647547	2648353	+	PA14_30580	51		LuxR family transcriptional	PA2591
1626	2	NA	2648473	2652352	+	PA14_30590, PA14_30600	NA		putative outer membrane, putative permease	PA2590, PA2589
1627	1	2653469	2652368	2653396	-	PA14_30620	73		AraC family transcriptional	PA2588
1628	1	2653940	2654014	2655162	+	PA14_30630	74		putative FAD-dependent monooxygenase	PA2587
1629	3	2655448	2655504	2658569	+	PA14_30650, PA14_30660, PA14_30670	56		response regulator GacA, excinuclease ABC subunit, CDP-diacylglycerol--glycerol-3-phosphate	PA2586, PA2585, PA2584
1630	1	2658638	2658638	2658710	+	PA14_30680	0		NA	NA
1631	1	2660539	2659452	2660507	-	PA14_30690	32		NA	NA
1632	1	NA	2661144	2664122	+	PA14_30700	NA		putative sensor/response regulator	PA2583
1633	1	2664184	2664213	2664746	+	PA14_30710	29		putative activator of	PA2582
1634	1	2665032	2665032	2665102	+	PA14_30720	0		NA	NA
1635	1	2666581	2665498	2666538	-	PA14_30730	43		hypothetical protein	PA2581
1636	1	NA	2666962	2667552	+	PA14_30740	NA		putative NADPH specific	PA2580
1637	1	NA	2667877	2668743	+	PA14_30750	NA		putative tryptophan oxygenase	PA2579
1638	2	NA	2668775	2669787	-	PA14_30760, PA14_30770	NA		putative acetyltransferase, AsnC family transcriptional	PA2578, PA2577
1639	1	2669822	2669920	2670819	+	PA14_30790	98		hypothetical protein	PA2576
1640	1	2671511	2670885	2671487	-	PA14_30800	24		hypothetical protein	PA2575
1641	1	NA	2671834	2672982	+	PA14_30810	NA		alkane-1-monooxygenase	PA2574
1642	1	2673069	2673094	2674701	+	PA14_30820	25		putative methyl-accepting chemotaxis	PA2573
1643	1	2676093	2674712	2676055	-	PA14_30830	38		putative two-component response	PA2572
1644	1	2676058	2676132	2677544	+	PA14_30840	74		putative signal transduction	PA2571
1645	4	NA	2678435	2682782	-	PA14_30850, PA14_30860, PA14_30870, PA14_30880	NA		NA, NA, NA, NA	NA, NA, NA, NA
1646	1	NA	2682980	2683123	+	PA14_30890	NA		NA	NA
1647	2	NA	2683111	2686286	-	PA14_30900, PA14_30910	NA		NA, NA	NA, NA
1648	4	NA	2686568	2690485	-	PA14_30930, PA14_30940, PA14_30950, PA14_30960	NA		NA, NA, NA, NA	NA, NA, NA, NA
1649	1	NA	2691005	2692000	-	PA14_30970	NA		NA	NA
1650	6	NA	2692127	2699525	-	PA14_30980, PA14_30990, PA14_31000, PA14_31010, PA14_31030, PA14_31040	NA		NA, NA, NA, putative cation efflux, NA, NA	NA, NA, NA, PA2520, NA, NA
1651	2	2701086	2699666	2701059	-	PA14_31050, PA14_31060	27	Annotation of ORF corrected by 5' end sequencing (original ORF: 2700661..2701278)	NA, NA	NA, NA
1652	1	NA	2701170	2703530	-	PA14_31070	NA		NA	NA
1653	3	NA	2703604	2705649	-	PA14_31080, PA14_31090, PA14_31100	NA		NA, NA, NA	NA, NA, NA
1654	2	NA	2705903	2707950	-	PA14_31110, PA14_31130	NA		NA, NA	NA, NA
1655	1	2708835	2708294	2708695	-	PA14_31150	140		NA	NA
1656	2	2708887	2708887	2709337	+	PA14_31160, PA14_31170	0	Annotation of ORF corrected by 5' end sequencing (original ORF: 2708860..2709183)	NA, NA	NA, NA
1657	1	NA	2709577	2710638	-	PA14_31180	NA		NA	NA
1658	1	NA	2710945	2712999	-	PA14_31190	NA		NA	NA
1659	1	NA	2713081	2713905	-	PA14_31200	NA		NA	NA
1660	1	NA	2714625	2714903	-	PA14_31220	NA		NA	NA
1661	1	NA	2714969	2715496	-	PA14_31230	NA		NA	NA
1662	1	NA	2715633	2716943	-	PA14_31240	NA		NA	NA
1663	1	NA	2717346	2717738	-	PA14_31250	NA		NA	NA
1664	1	NA	2718015	2718521	-	PA14_31260	NA		NA	NA
1665	2	2721561	2718848	2721213	-	PA14_31270, PA14_31280	348		NA, NA	NA, NA
1666	1	2721792	2721861	2722229	+	PA14_31290	69		PA-I galactophilic lectin	PA2570
1667	1	2722452	2722503	2722844	+	PA14_31300	51		hypothetical protein	PA2569
1668	1	2722941	2722963	2723370	+	PA14_31310	22		hypothetical protein	PA2568
1669	1	NA	2723429	2724928	-	PA14_31330	NA		EAL domain-containing protein	PA2567
1670	1	2725236	2725090	2725225	-	PA14_NovelOrf_012	11	TU contains unannotated ORF	Unannotated ORF	PA14_NovelOrf_012
1671	1	NA	2725301	2725657	+	PA14_31340	NA		NA	NA
1672	1	2725825	2726001	2727038	+	PA14_31350	176		hypothetical protein	PA2566
1673	2	2726760	2727061	2728303	+	PA14_31360, PA14_31370	301		hypothetical protein, hypothetical protein	PA2565, PA2564
1674	1	NA	2728313	2729800	-	PA14_31380	NA		putative sulfate transporter	PA2563
1675	1	NA	2730150	2730662	+	PA14_31390	NA		hypothetical protein	PA2562
1676	1	NA	2730777	2732504	-	PA14_31400	NA		putative chemotaxis transducer	PA2561
1677	1	2732617	2732652	2732939	+	PA14_31420	35		hypothetical protein	PA2560
1678	1	NA	2733014	2733244	-	PA14_31430	NA		NA	NA
1679	1	NA	2733563	2734105	+	PA14_31440	NA		hypothetical protein	PA2559
1680	1	NA	2734145	2734291	-	PA14_31450	NA		NA	NA
1681	1	NA	2734428	2735120	-	PA14_31460	NA		putative transport protein	PA2558
1682	1	2735241	2735341	2737035	+	PA14_31470	100		AMP-binding domain protein	PA2557
1683	1	2737040	2737104	2738189	+	PA14_31480	64		AraC family transcriptional	PA2556
1684	1	2738333	2738366	2740033	+	PA14_31500	33		putative AMP-binding protein	PA2555
1685	1	2739956	2740053	2740820	+	PA14_31510	97		putative short-chain dehydrogenase	PA2554
1686	2	2740764	2740838	2743184	+	PA14_31530, PA14_31540	74		putative acyl-CoA thiolase, putative acyl-CoA dehydrogenase	PA2553, PA2552
1687	1	NA	2743301	2744233	-	PA14_31560	NA		LysR family transcriptional	PA2551
1688	1	2744255	2744407	2745636	+	PA14_31580	152		putative acyl-CoA dehydrogenase	PA2550
1689	2	NA	2745827	2748414	-	PA14_31610, PA14_31620	NA		TerC family protein, hypothetical protein	PA2549, PA2548
1690	1	NA	2748474	2749379	-	PA14_31630	NA		LysR family transcriptional	PA2547
1691	1	NA	2749483	2749914	+	PA14_31640	NA		putative ring-cleaving dioxygenase	PA2546
1692	1	NA	2750021	2750833	-	PA14_31650	NA		exonuclease III	PA2545
1693	1	NA	2750978	2751691	+	PA14_31660	NA		hypothetical protein	PA2544
1694	8	2751825	2751825	2763218	+	PA14_31680, PA14_31690, PA14_31700, PA14_31720, PA14_31730, PA14_31740, PA14_31750, PA14_31760	0		hypothetical protein, hypothetical protein, putative CDP-alcohol phosphatidyltransferase, hypothetical protein, hypothetical protein, hypothetical protein, putative acyltransferase, putative phosphatidate cytidylyltransferase	PA2543, PA2542, PA2541, PA2540, PA2539, PA2538, PA2537, PA2536
1695	1	NA	2763407	2764402	-	PA14_31770	NA		putative oxidoreductase	PA2535
1696	1	NA	2764521	2765432	+	PA14_31780	NA		LysR family transcriptional	PA2534
1697	1	2765563	2765588	2766937	+	PA14_31800	25		putative sodium:alanine symporter	PA2533
1698	1	2767013	2767072	2767569	+	PA14_31810	59		thiol peroxidase	PA2532
1699	1	NA	2767719	2768843	-	PA14_31820	NA		putative aminotransferase	PA2531
1700	2	NA	2769040	2771798	-	PA14_31840, PA14_31850	NA		hypothetical protein, hypothetical protein	PA2530, PA2529
1701	5	NA	2772055	2781430	+	PA14_31870, PA14_31890, PA14_31900, PA14_31920, PA14_31930	NA		putative RND efflux, putative RND efflux, putative efflux transporter, putative outer membrane, NA	PA2528, PA2527, PA2526, PA2525, NA
1702	2	NA	2781439	2783528	-	PA14_31950, PA14_31960	NA		putative two-component sensor, putative two-component response	PA2524, PA2523
1703	4	NA	2784041	2790012	+	PA14_31970, PA14_31990, PA14_32015, PA14_32025	NA		CzcC family cobalt/zinc/cadmium, cobalt/zinc/cadmium efflux RND, NA, NA	PA2522, PA2521, NA, NA
1704	1	NA	2790219	2791175	+	PA14_32060	NA		transcriptional regulator XylS	PA2519
1705	3	NA	2791292	2794191	+	PA14_32080, PA14_32100, PA14_32110	NA		toluate 1,2-dioxygenase alpha, toluate 1,2-dioxygenase beta, toluate 1,2-dioxygenase electron	PA2518, PA2517, PA2516
1706	1	NA	2794217	2794978	+	PA14_32130	NA		NA	NA
1707	3	2797936	2794984	2797907	-	PA14_32140, PA14_32150, PA14_32160	29		anthranilate dioxygenase reductase, anthranilate dioxygenase small, anthranilate dioxygenase large	PA2514, PA2513, PA2512
1708	1	2798174	2798224	2799225	+	PA14_32190	50		putative transcriptional regulator	PA2511
1709	1	NA	2799234	2800106	-	PA14_32200	NA		transcriptional regulator CatR	PA2510
1710	1	2800178	2800268	2801389	+	PA14_32220	90		muconate cycloisomerase I	PA2509
1711	2	2801394	2801421	2802688	+	PA14_32230, PA14_32240	27		muconolactone delta-isomerase, catechol 1,2-dioxygenase	PA2508, PA2507
1712	1	NA	2802846	2803064	-	PA14_32250	NA		hypothetical protein	PA2506
1713	1	NA	2803427	2804773	+	PA14_32270	NA		putative porin	PA2505
1714	1	NA	2805025	2805642	+	PA14_32280	NA		hypothetical protein	PA2504
1715	1	2806923	2805646	2806899	-	PA14_32290	24		hypothetical protein	PA2503
1716	1	NA	2806858	2808357	+	PA14_32300	NA		putative kinase	PA2502
1717	1	2808431	2808461	2808628	+	PA14_32310	30		hypothetical protein	PA2501
1718	3	NA	2808672	2811000	-	PA14_32330, PA14_32340, PA14_32350	NA		putative cyanate permease, putative deaminase, hypothetical protein	PA2500, PA2499, PA2498
1719	2	NA	2811128	2812580	+	PA14_32360, PA14_32370	NA		lysR family transcriptional, putative DNA damage-inducible	PA2497, PA2496
1720	3	NA	2812739	2818608	-	PA14_32380, PA14_32390, PA14_32400	NA		multidrug efflux outer, RND multidrug efflux, RND multidrug efflux	PA2495, PA2494, PA2493
1721	1	2819771	2818839	2819753	-	PA14_32410	18		transcriptional regulator MexT	PA2492
1722	1	2819934	2819974	2820993	+	PA14_32420	40		putative oxidoreductase	PA2491
1723	1	2821451	2821052	2821426	-	PA14_32440	25		hypothetical protein	PA2490
1724	2	2823144	2821507	2823116	-	PA14_32450, PA14_32460	28		AraC family transcriptional, putative transcriptional regulator	PA2489, PA2488
1725	1	NA	2823214	2823486	+	PA14_32470	NA		hypothetical protein	PA2487
1726	2	NA	2823512	2824001	-	PA14_32480, PA14_32490	NA		hypothetical protein, hypothetical protein	PA2486, PA2485
1727	1	2824007	2824030	2824644	+	PA14_32500	23		TetR family transcriptional	PA2484
1728	1	NA	2824795	2825796	+	PA14_32520	NA		hypothetical protein	PA2483
1729	2	NA	2825911	2827442	+	PA14_32530, PA14_32540	NA		putative cytochrome c, hypothetical protein	PA2482, PA2481
1730	2	NA	2827632	2829631	-	PA14_32570, PA14_32580	NA		two-component sensor, two-component response regulator	PA2480, PA2479
1731	2	NA	2829794	2832399	+	PA14_32590, PA14_32600	NA		thiol:disulfide interchange protein, thiol:disulfide interchange protein	PA2478, PA2477
1732	1	NA	2832396	2833166	+	PA14_32610	NA		disulfide isomerase/thiol-disulfide oxidase	PA2476
1733	1	NA	2833239	2834573	+	PA14_32630	NA		cytochrome P450	PA2475
1734	3	NA	2834555	2837511	-	PA14_32640, PA14_32650, PA14_32660	NA		hypothetical protein, putative glutathione S-transferase, MFS family transporter	PA2474, PA2473, PA2472
1735	2	NA	2837589	2839361	-	PA14_32670, PA14_32690	NA		hypothetical protein, gentisate 1,2-dioxygenase	PA2471, PA2470
1736	1	NA	2839486	2840400	+	PA14_32700	NA		transcriptional regulator	PA2469
1737	2	NA	2840489	2842002	+	PA14_32710, PA14_32720	NA		ECF subfamily RNA, transmembrane sensor	PA2468, PA2467
1738	1	NA	2842146	2844608	+	PA14_32740	NA		TonB-dependent receptor	PA2466
1739	1	NA	2844726	2845874	+	PA14_32750	NA		hypothetical protein	PA2465
1740	1	2845895	2845921	2846445	+	PA14_32770	26		hypothetical protein	PA2464
1741	2	NA	2846758	2864206	+	PA14_32780, PA14_32790	NA		hypothetical protein, hypothetical protein	PA2463, PA2462
1742	2	2864212	2864212	2865490	+	PA14_NovelOrf_013, PA14_32810	0	TU contains unannotated ORF	Unannotated ORF, NA	PA14_NovelOrf_013, NA
1743	1	2866733	2866985	2867121	+	PA14_NovelOrf_014	252	TU contains unannotated ORF	Unannotated ORF	PA14_NovelOrf_014
1744	1	2868497	2868510	2868887	+	PA14_32820	13	Annotation of ORF corrected by 5' end sequencing (original ORF: 2868300..2868887)	NA	NA
1745	1	2869305	2869305	2870170	+	PA14_NovelOrf_015	0	TU contains unannotated ORF	Unannotated ORF	PA14_NovelOrf_015
1746	2	NA	2870581	2874218	-	PA14_32830, PA14_32840	NA		NA, NA	NA, NA
1747	1	NA	2874987	2876003	-	PA14_32850	NA		NA	NA
1748	3	2878220	2876533	2878192	-	PA14_32860, PA14_32880, PA14_32890	28		hypothetical protein, hypothetical protein, hypothetical protein	PA2455, PA2454, PA2453
1749	1	NA	2878349	2879929	+	PA14_32905	NA		NA	NA
1750	1	NA	2880132	2881049	+	PA14_32930	NA		hypothetical protein	PA2450
1751	1	NA	2881131	2882666	+	PA14_32940	NA		transcriptional regulator	PA2449
1752	1	2884446	2882674	2884416	-	PA14_32950	30		hypothetical protein	PA2448
1753	1	2884459	2884539	2885462	+	PA14_32970	80		transcriptional regulator	PA2447
1754	4	2885670	2885721	2891817	+	PA14_32985, PA14_33000, PA14_33010, PA14_33030	51		glycine cleavage system, glycine dehydrogenase, serine hydroxymethyltransferase, L-serine dehydratase	PA2446, PA2445, PA2444, PA2443
1755	1	2891856	2891911	2893032	+	PA14_33040	55		glycine cleavage system	PA2442
1756	1	2893933	2893079	2893783	-	PA14_33050	150	Annotation of ORF corrected by 5' end sequencing (original ORF: 2893079..2893954)	hypothetical protein	PA2441
1757	1	2895188	2893951	2894922	-	PA14_33060	266		hypothetical protein	PA2440
1758	3	NA	2895611	2899673	+	PA14_33070, PA14_33080, PA14_33110	NA		hypothetical protein, hypothetical protein, hypothetical protein	PA2439, PA2438, PA2437
1759	3	2899754	2899827	2902817	+	PA14_33120, PA14_33130, PA14_33150	73		hypothetical protein, putative cation-transporting P-type, hypothetical protein	PA2436, PA2435, PA2434
1760	1	2903295	2902952	2903221	-	PA14_33160	74		hypothetical protein	PA2433
1761	1	NA	2903336	2904250	-	PA14_33170	NA		putative transcriptional regulator	PA2432
1762	3	NA	2904651	2908025	+	PA14_33190, PA14_33200, PA14_33220	NA		hypothetical protein, NA, hypothetical protein	PA2431, NA, PA2430
1763	1	NA	2908062	2908307	-	PA14_33230	NA		hypothetical protein	PA2429
1764	1	NA	2908569	2909483	+	PA14_33240	NA		hypothetical protein	PA2428
1765	1	2909549	2909570	2910037	+	PA14_33250	21		hypothetical protein	PA2427
1766	1	NA	2910054	2910617	-	PA14_33260	NA		extracytoplasmic-function sigma-70 factor	PA2426
1767	2	2911139	2911261	2925127	+	PA14_33270, PA14_33280	122		PvdG, peptide synthase	PA2425, PA2424
1768	1	2926281	2925613	2926125	-	PA14_33290	156	Annotation of ORF corrected by 5' end sequencing (original ORF: 2925613..2926368)	hypothetical protein	PA2423
1769	4	2931507	2927517	2931397	-	PA14_33300, PA14_33310, PA14_33320, PA14_33330	110		NA, NA, NA, NA	NA, NA, NA, NA
1770	2	2935702	2931455	2935656	-	PA14_33340, PA14_33350	46		NA, NA	NA, NA
1771	1	NA	2935897	2937291	+	PA14_33360	NA		NA	NA
1772	1	NA	2937476	2937790	-	PA14_33370	NA		hypothetical protein	PA2422
1773	2	NA	2938495	2940867	-	PA14_33380, PA14_33410	NA		hypothetical protein, porin	PA2421, PA2420
1774	1	2941713	2940949	2941629	-	PA14_33420	84		putative hydrolase	PA2419
1775	1	2942612	2941727	2942587	-	PA14_33430	25		putative pirin-related protein	PA2418
1776	1	NA	2942688	2943626	+	PA14_33440	NA		LysR family transcriptional	PA2417
1777	1	NA	2943630	2945267	-	PA14_33450	NA		trehalase	PA2416
1778	2	NA	2945626	2947363	+	PA14_33460, PA14_33480	NA		hypothetical protein, L-sorbosone dehydrogenase	PA2415, PA2414
1779	1	2947503	2947542	2948951	+	PA14_33500	39		diaminobutyrate--2-oxoglutarate	PA2413
1780	2	2948983	2949029	2950012	+	PA14_33510, PA14_33520	46		hypothetical protein, putative thioesterase	PA2412, PA2411
1781	4	2953661	2950112	2953633	-	PA14_33530, PA14_33540, PA14_33550, PA14_33560	28		hypothetical protein, putative permease of, putative ATP-binding component, putative adhesion protein	PA2410, PA2409, PA2408, PA2407
1782	4	NA	2953666	2956296	-	PA14_33570, PA14_33580, PA14_33590, PA14_33600	NA		hypothetical protein, hypothetical protein, hypothetical protein, hypothetical protein	PA2406, PA2405, PA2404, PA2403
1783	2	2956599	2956615	2978637	+	PA14_33610, PA14_33630	16		peptide synthase, PvdJ	PA2402, PA2400
1784	1	2978611	2978649	2985995	+	PA14_33650	38		pyoverdine synthetase D	PA2399
1785	1	2988665	2986159	2988606	-	PA14_33680	59		ferripyoverdine receptor	PA2398
1786	1	NA	2988709	2990358	-	PA14_33690	NA		pyoverdine biosynthesis protein	PA2397
1787	1	2990637	2990736	2991563	+	PA14_33700	99		pyoverdine synthetase F	PA2396
1788	3	NA	2991632	2995167	-	PA14_33710, PA14_33720, PA14_33730	NA		PvdO, PvdN, putative dipeptidase precursor	PA2395, PA2394, PA2393
1789	1	NA	2995383	2997017	+	PA14_33740	NA		PvdP	PA2392
1790	3	3001721	2997066	3001662	-	PA14_33750, PA14_33760, PA14_33770	59		putative outer membrane, putative ATP-binding/permease fusion, hypothetical protein	PA2391, PA2390, PA2389
1791	1	3002819	3001763	3002758	-	PA14_33780	61		putative transmembrane sensor	PA2388
1792	1	3002838	3002922	3003401	+	PA14_33800	84		RNA polymerase sigma	PA2387
1793	1	3003489	3003534	3004865	+	PA14_33810	45		L-ornithine N5-oxygenase	PA2386
1794	1	NA	3004988	3007276	+	PA14_33820	NA		penicillin acylase-related protein	PA2385
1795	1	3007347	3007457	3007780	+	PA14_33830	110		hypothetical protein	PA2384
1796	1	NA	3007822	3008742	+	PA14_33840	NA		putative transcriptional regulator	PA2383
1797	1	NA	3008839	3009990	+	PA14_33860	NA		L-lactate dehydrogenase	PA2382
1798	1	3010362	3010057	3010299	-	PA14_33870	63		hypothetical protein	PA2381
1799	1	3010478	3010594	3010830	+	PA14_33880	116		hypothetical protein	PA2380
1800	2	3011008	3011096	3013878	+	PA14_33890, PA14_33900	88		putative oxidoreductase, putative aldehyde dehydrogenase	PA2379, PA2378
1801	2	3016490	3014295	3016342	-	PA14_33910, PA14_33920	148		hypothetical protein, putative transcriptional regulator	PA2377, PA2376
1802	1	3016594	3016619	3017014	+	PA14_33930	25		hypothetical protein	PA2375
1803	11	3029858	3017037	3029709	-	PA14_33940, PA14_33960, PA14_33970, PA14_33980, PA14_33990, PA14_34000, PA14_34010, PA14_34020, PA14_34030, PA14_34050, PA14_34070	149		hypothetical protein, hypothetical protein, NA, NA, putative ClpA/B-type protease, hypothetical protein, hypothetical protein, hypothetical protein, hypothetical protein, hypothetical protein, hypothetical protein	PA2374, PA2373, NA, NA, PA2371, PA2370, PA2369, PA2368, PA2367, PA2366, PA2365
1804	1	3029882	3029917	3030393	+	PA14_34080	35		hypothetical protein	PA2364
1805	4	3030425	3030453	3037469	+	PA14_34100, PA14_34110, PA14_34130, PA14_34140	28		hypothetical protein, hypothetical protein, hypothetical protein, hypothetical protein	PA2363, PA2362, PA2361, PA2360
1806	1	3037555	3037579	3038664	+	PA14_34150	24		putative transcriptional regulator	PA2359
1807	1	NA	3038777	3039166	+	PA14_34170	NA		hypothetical protein	PA2358
1808	4	NA	3039326	3043382	+	PA14_34180, PA14_34190, PA14_34200, PA14_34210	NA		NADH-dependent FMN reductase, methanesulfonate sulfonatase MsuD, putative FMNH2-dependent monooxygenase, putative transcriptional regulator	PA2357, PA2356, PA2355, PA2354
1809	1	NA	3043554	3044708	+	PA14_34230	NA		hypothetical protein	PA2353
1810	1	NA	3044774	3045901	-	PA14_34250	NA		putative glycerophosphoryl diester	PA2352
1811	6	NA	3046079	3052517	-	PA14_34260, PA14_34270, PA14_34280, PA14_34290, PA14_34300, PA14_34320	NA		putative permease of, putative ATP-binding component, hypothetical protein, DszA family monooxygenase, DszC family monooxygenase, DszC family monooxygenase	PA2351, PA2350, PA2349, PA2348, PA2347, PA2346
1812	1	3052878	3052936	3054171	+	PA14_34330	58		hypothetical protein	PA2345
1813	1	NA	3054202	3055134	-	PA14_34340	NA		fructokinase	PA2344
1814	7	3063581	3055176	3063556	-	PA14_34350, PA14_34360, PA14_34370, PA14_34390, PA14_34410, PA14_34420, PA14_34440	25		xylulose kinase, mannitol dehydrogenase, putative ATP-binding component, putative binding-protein-dependent, putative binding-protein-dependent, putative binding protein, transcriptional regulator MtlR	PA2343, PA2342, PA2341, PA2340, PA2339, PA2338, PA2337
1815	1	NA	3063779	3064684	-	PA14_34450	NA		AraC family transcriptional	PA2332
1816	1	3064763	3064789	3065349	+	PA14_34460	26		hypothetical protein	PA2331
1817	4	NA	3065399	3069225	+	PA14_34490, PA14_34500, PA14_34510, PA14_34520	NA		hypothetical protein, putative ATP-binding component, hypothetical protein, ABC transporter permease	PA2330, PA2329, PA2328, PA2327
1818	1	NA	3069451	3070860	+	PA14_34540	NA		xenobiotic compound DszA	PA2326
1819	2	NA	3070920	3073445	-	PA14_34550, PA14_34580	NA		hypothetical protein, hypothetical protein	PA2325, PA2324
1820	1	NA	3073663	3075288	-	PA14_34600	NA		putative glyceraldehyde-3-phosphate	PA2323
1821	2	NA	3075453	3076974	-	PA14_34610, PA14_34630	NA		NA, gluconate permease	NA, PA2322
1822	1	NA	3077071	3077592	-	PA14_34640	NA		gluconokinase	PA2321
1823	1	3077759	3077787	3078818	+	PA14_34660	28		transcriptional regulator GntR	PA2320
1824	2	NA	3079172	3080868	-	PA14_34670, PA14_34680	NA		cupin superfamily protein, putative oxidoreductase	PA2318, PA2317
1825	1	3081899	3080972	3081865	-	PA14_34690	34		LysR family transcriptional	PA2316
1826	2	NA	3081983	3084411	+	PA14_34700, PA14_34710	NA		putative beta lactamase, major facilitator transporter	PA2315, PA2314
1827	1	NA	3084472	3085272	-	PA14_34720	NA		hypothetical protein	PA2313
1828	2	NA	3085289	3086083	-	PA14_34730, PA14_34740	NA		XRE family transcriptional, hypothetical protein	PA2312, PA2311
1829	3	NA	3086373	3089179	+	PA14_34750, PA14_34770, PA14_34780	NA		putative taurine catabolism, putative ABC transporter,, putative ABC transporter	PA2310, PA2309, PA2308
1830	1	3089184	3089196	3090062	+	PA14_34790	12		putative permease of	PA2307
1831	1	NA	3090172	3090789	+	PA14_34800	NA		amino acid transporter	PA2306
1832	3	3090855	3090885	3096767	+	PA14_34810, PA14_34820, PA14_34830	30		putative non-ribosomal peptide, putative regulatory protein, putative regulatory protein	PA2305, PA2304, PA2303
1833	2	3096768	3096787	3103774	+	PA14_34840, PA14_34850	19		putative non-ribosomal peptide, putative tRNA synthase	PA2302, PA2301
1834	1	3103855	3103993	3105444	+	PA14_34870	138		chitinase	PA2300
1835	3	NA	3105621	3108422	+	PA14_34880, PA14_34900, PA14_34920	NA		GntR family transcriptional, putative oxidoreductase, putative ferredoxin	PA2299, PA2298, PA2297
1836	2	NA	3108760	3110003	+	PA14_34930, PA14_34940	NA		putative phycobiliprotein, hypothetical protein	PA2293, PA2292
1837	1	3110242	3110344	3111702	+	PA14_34960	102		glucose-sensitive porin	PA2291
1838	1	3111801	3111856	3114267	+	PA14_34970	55		glucose dehydrogenase	PA2290
1839	1	3114361	3114399	3116519	+	PA14_34990	38		putative TonB-dependent receptor	PA2289
1840	1	3116593	3116640	3116927	+	PA14_35000	47		hypothetical protein	PA2288
1841	6	NA	3116940	3122326	-	PA14_35010, PA14_35020, PA14_35030, PA14_35040, PA14_35050, PA14_35060	NA		hypothetical protein, hypothetical protein, hypothetical protein, hypothetical protein, hypothetical protein, hypothetical protein	PA2287, PA2286, PA2285, PA2284, PA2283, PA2282
1842	1	NA	3122614	3123468	+	PA14_35070	NA		AraC family transcriptional	PA2281
1843	4	NA	3123481	3126334	-	PA14_35080, PA14_35100, PA14_35110, PA14_35130	NA		putative arsenical resistance, arsenate reductase, ArsB protein, arsenic resistance transcriptional	PA2280, PA2279, PA2278, PA2277
1844	1	NA	3126413	3127303	-	PA14_35140	NA		AraC family transcriptional	PA2276
1845	1	NA	3127512	3128573	+	PA14_35150	NA		putative alcohol dehydrogenase	PA2275
1846	1	3129008	3128598	3128975	-	PA14_35160	33		hypothetical protein	PA2274
1847	1	NA	3129053	3129523	+	PA14_35170	NA		putative redox-sensing activator	PA2273
1848	1	NA	3129531	3131228	-	PA14_35190	NA		penicillin-binding protein 3A	PA2272
1849	2	NA	3131350	3132463	-	PA14_35200, PA14_35210	NA		putative acetyltransferase, TetR family transcriptional	PA2271, PA2270
1850	1	NA	3132610	3133815	+	PA14_35230	NA		hypothetical protein	PA2269
1851	1	NA	3133779	3134849	-	PA14_35240	NA		hypothetical protein	PA2268
1852	1	NA	3134936	3135832	+	PA14_35250	NA		LysR family transcriptional	PA2267
1853	3	3139809	3135932	3139757	-	PA14_35270, PA14_35290, PA14_35300	52		putative cytochrome c, gluconate dehydrogenase, hypothetical protein	PA2266, PA2265, PA2264
1854	4	NA	3139925	3144025	-	PA14_35320, PA14_35330, PA14_35340, PA14_35360	NA		putative 2-hydroxyacid dehydrogenase, putative 2-ketogluconate transporter, putative 2-ketogluconate kinase, hypothetical protein	PA2263, PA2262, PA2261, PA2260
1855	1	3145196	3144097	3145119	-	PA14_35370	77		transcriptional regulator PtxS	PA2259
1856	1	NA	3145681	3146619	+	PA14_35380	NA		transcriptional regulator PtxR	PA2258
1857	4	NA	3146722	3150795	-	PA14_35390, PA14_35400, PA14_35420, PA14_35430	NA		pyoverdine biosynthesis protein, pyoverdine biosynthesis protein, pyoverdine biosynthesis protein, pyoverdine biosynthesis protein	PA2257, PA2256, PA2255, PA2254
1858	1	NA	3151011	3151997	-	PA14_35440	NA		L-asparaginase I	PA2253
1859	1	NA	3152097	3153542	-	PA14_35460	NA		putative AGCS sodium/alanine/glycine	PA2252
1860	1	NA	3153711	3154529	+	PA14_35470	NA		hypothetical protein	PA2251
1861	4	3159825	3154662	3159628	-	PA14_35490, PA14_35500, PA14_35520, PA14_35530	197		dihydrolipoamide dehydrogenase, branched-chain alpha-keto acid, 2-oxoisovalerate dehydrogenase subunit, 2-oxoisovalerate dehydrogenase (alpha	PA2250, PA2249, PA2248, PA2247
1862	1	NA	3159938	3160399	+	PA14_35540	NA		transcriptional regulator BkdR	PA2246
1863	3	NA	3160432	3163555	-	PA14_35550, PA14_35570, PA14_35590	NA		hypothetical protein, hypothetical protein, putative FAD-binding dehydrogenase	PA2245, PA2244, PA2243
1864	1	NA	3163743	3164810	-	PA14_35600	NA		hypothetical protein	PA2242
1865	7	NA	3164893	3174547	-	PA14_35620, PA14_35630, PA14_35640, PA14_35650, PA14_35670, PA14_35680, PA14_35690	NA		hypothetical protein, hypothetical protein, putative transferase, hypothetical protein, putative glycosyl hydrolase, hypothetical protein, hypothetical protein	PA2241, PA2240, PA2239, PA2238, PA2237, PA2236, PA2235
1866	1	3174724	3174726	3175307	+	PA14_35700	2	Annotation of ORF corrected by 5' end sequencing (original ORF: 3174603..3175307)	NA	NA
1867	2	3176712	3175803	3176615	-	PA14_35710, PA14_35720	97		NA, NA	NA, NA
1868	1	NA	3176984	3177358	-	PA14_35730	NA		NA	NA
1869	2	NA	3177507	3180880	+	PA14_35740, PA14_35750	NA		NA, NA	NA, NA
1870	4	3184629	3181060	3184587	-	PA14_35760, PA14_35770, PA14_35780, PA14_35790	42		NA, NA, NA, NA	NA, NA, NA, NA
1871	2	3187100	3184999	3187047	-	PA14_35800, PA14_35810	53		NA, NA	NA, NA
1872	1	3188160	3187110	3188081	-	PA14_35820	79		NA	NA
1873	1	3188218	3188265	3189263	+	PA14_35830	47		NA	NA
1874	1	3189281	3189302	3189946	+	PA14_35840	21		NA	NA
1875	1	3189791	3189927	3190406	+	PA14_35850	136		NA	NA
1876	1	3190848	3190988	3192292	+	PA14_35860	140		NA	NA
1877	1	NA	3192371	3193795	+	PA14_35880	NA		NA	NA
1878	1	NA	3193841	3195094	+	PA14_35890	NA		NA	NA
1879	1	NA	3195183	3196103	+	PA14_35900	NA		NA	NA
1880	2	NA	3196396	3198149	-	PA14_35920, PA14_35930	NA		NA, NA	NA, NA
1881	1	NA	3198432	3200078	-	PA14_35940	NA		NA	NA
1882	4	NA	3200165	3203704	-	PA14_35950, PA14_35970, PA14_35980, PA14_35990	NA		NA, NA, NA, NA	NA, NA, NA, NA
1883	1	3203735	3203760	3205712	+	PA14_36000	25	Annotation of ORF corrected by 5' end sequencing (original ORF: 3204291..3205712)	prpR proprionate catabolism operon	NA
1884	1	NA	3205778	3206281	-	PA14_36010	NA		NA	NA
1885	2	NA	3206340	3209256	-	PA14_36020, PA14_36030	NA		NA, NA	NA, NA
1886	1	NA	3209914	3211497	-	PA14_36050	NA		putative aldehyde dehydrogenase	PA2217
1887	3	NA	3211626	3215177	-	PA14_36060, PA14_36070, PA14_36080	NA		hypothetical protein, hypothetical protein, putative MFS transporter	PA2216, PA2215, PA2214
1888	1	NA	3215363	3216613	-	PA14_36090	NA		putative porin	PA2213
1889	3	NA	3216786	3220073	-	PA14_36100, PA14_36110, PA14_36120	NA		4-hydroxythreonine-4-phosphate dehydrogenase, hypothetical protein, putative MFS transporter	PA2212, PA2211, PA2210
1890	3	NA	3220256	3223428	+	PA14_36130, PA14_36150, PA14_36170	NA		hypothetical protein, hypothetical protein, hypothetical protein	PA2209, PA2208, PA2207
1891	1	NA	3223496	3224443	+	PA14_36180	NA		LysR family transcriptional	PA2206
1892	1	NA	3224525	3225001	+	PA14_36190	NA		hypothetical protein	PA2205
1893	1	3225250	3225300	3226106	+	PA14_36200	50		putative binding protein	PA2204
1894	2	NA	3226187	3227582	+	PA14_36220, PA14_36230	NA		putative amino acid, amino acid ABC	PA2203, PA2202
1895	1	3228562	3227598	3228482	-	PA14_36250	80		hypothetical protein	PA2201
1896	1	NA	3228608	3230203	-	PA14_36260	NA		putative signal transduction	PA2200
1897	1	3231268	3230292	3231167	-	PA14_36270	101		putative dehydrogenase	PA2199
1898	2	NA	3231173	3232551	-	PA14_36280, PA14_36290	NA		putative antibiotic biosynthesis, hypothetical protein	PA2198, PA2197
1899	1	3233266	3232682	3233266	-	PA14_36300	0		TetR family transcriptional	PA2196
1900	3	3236410	3233419	3236380	-	PA14_36310, PA14_36320, PA14_36330	30		hydrogen cyanide synthase, hydrogen cyanide synthase, hydrogen cyanide synthase	PA2195, PA2194, PA2193
1901	1	NA	3236744	3237988	+	PA14_36345	NA		adenylate cyclase ExoY	PA2191
1902	1	NA	3237985	3238539	-	PA14_36350	NA		hypothetical protein	PA2189
1903	2	NA	3238696	3240360	-	PA14_36360, PA14_36370	NA		hypothetical protein, carboxylate-amine ligase	PA2187, PA2181
1904	2	NA	3240498	3242856	+	PA14_36375, PA14_36390	NA		hypothetical protein, hypothetical protein	PA2180, PA2179
1905	1	NA	3242840	3243160	-	PA14_36400	NA		NA	NA
1906	1	NA	3243223	3243831	+	PA14_36410	NA		hypothetical protein	PA2178
1907	1	NA	3243835	3245934	-	PA14_36420	NA		putative sensor/response regulator	PA2177
1908	2	NA	3246017	3246967	+	PA14_36450, PA14_36460	NA		hypothetical protein, hypothetical protein	PA2176, PA2175
1909	1	3247192	3247252	3247560	+	PA14_36470	60		hypothetical protein	PA2174
1910	4	NA	3247591	3249795	-	PA14_36480, PA14_36490, PA14_36500, PA14_36520	NA		NA, hypothetical protein, hypothetical protein, hypothetical protein	NA, PA2173, PA2172, PA2171
1911	1	NA	3249997	3250449	-	PA14_36530	NA		hypothetical protein	PA2169
1912	2	NA	3250575	3252445	-	PA14_36540, PA14_36550	NA		hypothetical protein, hypothetical protein	PA2168, PA2167
1913	1	3253187	3252774	3253139	-	PA14_36560	48		hypothetical protein	PA2166
1914	12	NA	3253507	3269784	+	PA14_36570, PA14_36580, PA14_36590, PA14_36605, PA14_36620, PA14_36630, PA14_36650, PA14_36660, PA14_36670, PA14_36680, PA14_36690, PA14_36700	NA		glycogen synthase, putative glycosyl hydrolase, putative 4-alpha-glucanotransferase, putative glycosyl hydrolase, hypothetical protein, putative glycosyl hydrolase, hypothetical protein, putative alcohol dehydrogenase, hypothetical protein, hypothetical protein, cardiolipin synthase 2, hypothetical protein	PA2165, PA2164, PA2163, PA2162, PA2161, PA2160, PA2159, PA2158, PA2157, PA2156, PA2155, PA2154
1915	3	NA	3269786	3277288	-	PA14_36710, PA14_36730, PA14_36740	NA		glycogen branching enzyme, putative trehalose synthase, hypothetical protein	PA2153, PA2152, PA2151
1916	6	NA	3277432	3281688	-	PA14_36760, PA14_36770, PA14_36780, PA14_36790, PA14_36810, PA14_36820	NA		KU domain-containing protein, hypothetical protein, hypothetical protein, NA, hydroperoxidase II, hypothetical protein	PA2150, PA2149, PA2148, NA, PA2147, PA2146
1917	1	NA	3282187	3282585	+	PA14_36830	NA		hypothetical protein	PA2145
1918	1	NA	3282592	3285030	-	PA14_36840	NA		glycogen phosphorylase	PA2144
1919	1	NA	3285083	3285370	-	PA14_36850	NA		hypothetical protein	PA2143
1920	1	NA	3285614	3285802	+	PA14_36860	NA		NA	NA
1921	6	NA	3285822	3290863	-	PA14_36870, PA14_36880, PA14_36890, PA14_36900, PA14_36910, PA14_36920	NA		putative short-chain dehydrogenase, putative ompetence-damaged protein, putative metallothionein, NA, ATP-dependent DNA ligase, hypothetical protein	PA2142, PA2141, PA2140, NA, PA2138, PA2137
1922	2	NA	3290965	3291964	+	PA14_36930, PA14_36940	NA		hypothetical protein, NA	PA2136, NA
1923	2	NA	3291942	3293907	-	PA14_36960, PA14_36980	NA		putative transporter, hypothetical protein	PA2135, PA2134
1924	6	NA	3294000	3300902	-	PA14_36990, PA14_37000, PA14_37010, PA14_37030, PA14_37040, PA14_37060	NA		EAL domain-containing protein, chaperone CupA5, fimbrial subunit CupA4, usher, chaperone CupA2, fimbrial subunit CupA1	PA2133, PA2132, PA2131, PA2130, PA2129, PA2128
1925	1	NA	3301756	3302982	+	PA14_37070	NA		hypothetical protein	PA2127
1926	1	NA	3303409	3304044	+	PA14_37080	NA		hypothetical protein	PA2126
1927	4	NA	3304080	3309397	-	PA14_37090, PA14_37100, PA14_37120, PA14_37130	NA		putative aldehyde dehydrogenase, putative dehydrogenase, LysR family transcriptional, hypothetical protein	PA2125, PA2124, PA2123, PA2122
1928	1	NA	3309523	3310428	+	PA14_37140	NA		LysR family transcriptional	PA2121
1929	2	NA	3310576	3312133	+	PA14_37150, PA14_37170	NA		hypothetical protein, NA	PA2120, NA
1930	1	NA	3312668	3313744	-	PA14_37190	NA		O6-methylguanine-DNA methyltransferase	PA2118
1931	1	NA	3313936	3314919	+	PA14_37200	NA		hypothetical protein	PA2117
1932	1	3315733	3314904	3315701	-	PA14_37210	32		hypothetical protein	PA2116
1933	1	NA	3315808	3316761	-	PA14_37220	NA		LysR family transcriptional	PA2115
1934	5	3316968	3317016	3321965	+	PA14_37250, PA14_37260, PA14_37270, PA14_37290, PA14_37310	48		major facilitator transporter, putative porin, LamB/YcsF family protein, hypothetical protein, hypothetical protein	PA2114, PA2113, PA2112, PA2111, PA2110
1935	1	NA	3322033	3322509	+	PA14_37320	NA		hypothetical protein	PA2109
1936	1	NA	3322528	3324300	-	PA14_37340	NA		thiamine pyrophosphate protein	PA2108
1937	1	NA	3324471	3324869	+	PA14_37350	NA		hypothetical protein	PA2107
1938	3	NA	3325268	3328426	-	PA14_37360, PA14_37370, PA14_37380	NA		short chain dehydrogenase, putative esterase, putative flavin-binding monooxygenase	PA2099, PA2098, PA2097
1939	1	NA	3328573	3329607	+	PA14_37400	NA		AraC family transcriptional	PA2096
1940	1	NA	3329756	3330601	+	PA14_37410	NA		hypothetical protein	PA2095
1941	2	NA	3330603	3332065	-	PA14_37420, PA14_37430	NA		putative transmembrane sensor, RNA polymerase sigma	PA2094, PA2093
1942	10	3344637	3332168	3344595	-	PA14_37440, PA14_37460, PA14_37470, PA14_37490, PA14_37510, PA14_37520, PA14_37530, PA14_37550, PA14_37560, PA14_37570	42		putative MFS transporter, putative permease, putative flavin-dependent oxidoreductase, putative TonB-dependent receptor, hypothetical protein, hypothetical protein, putative hydrolase, putative ring-hydroxylating dioxygenase, asparagine synthetase, glutamine-hydrolysing, ring-hydroxylating dioxygenase, large	PA2092, PA2091, PA2090, PA2089, PA2088, PA2087, PA2086, PA2085, PA2084, PA2083
1943	1	3345371	3344797	3345273	-	PA14_37580	98		putative leucine-responsive regulatory	PA2082
1944	2	3345386	3345406	3347301	+	PA14_37590, PA14_37610	20		kynurenine formamidase, KynB, kynureninase	PA2081, PA2080
1945	1	NA	3347457	3348863	+	PA14_37630	NA		putative amino acid	PA2079
1946	2	NA	3349149	3352967	+	PA14_37640, PA14_37650	NA		hypothetical protein, hypothetical protein	PA2078, PA2077
1947	1	NA	3353004	3353906	-	PA14_37660	NA		putative transcriptional regulator	PA2076
1948	1	3354396	3354420	3354629	+	PA14_37670	24	Annotation of ORF corrected by 5' end sequencing (original ORF: 3354363..3354629)	NA	NA
1949	1	NA	3354806	3356473	+	PA14_37680	NA		hypothetical protein	PA2075
1950	1	3359501	3356866	3359460	-	PA14_37690	41		putative sensory box	PA2072
1951	1	3361786	3359632	3361740	-	PA14_37710	46		elongation factor G	PA2071
1952	1	NA	3362016	3364658	+	PA14_37730	NA		putative TonB dependent	PA2070
1953	4	3364801	3364838	3369074	+	PA14_37745, PA14_37760, PA14_37770, PA14_37780	37		carbamoyl transferase, putative MFS transporter, putative hydrolase, hypothetical protein	PA2069, PA2068, PA2067, PA2066
1954	2	NA	3369223	3372095	+	PA14_37790, PA14_37810	NA		copper resistance protein, copper resistance protein	PA2065, PA2064
1955	1	3373386	3372115	3373338	-	PA14_37820	48		hypothetical protein	PA2063
1956	1	NA	3373541	3374722	-	PA14_37830	NA		putative pyridoxal-phosphate dependent	PA2062
1957	5	NA	3374868	3382925	-	PA14_37840, PA14_37850, PA14_37870, PA14_37880, PA14_37900	NA		putative ATP-binding component, putative permease of, putative peptide ABC, putative binding protein, putative TonB-dependent receptor	PA2061, PA2060, PA2059, PA2058, PA2057
1958	1	NA	3383604	3384506	-	PA14_37910	NA		LysR family transcriptional	PA2056
1959	1	NA	3384617	3386032	+	PA14_37915	NA		major facilitator transporter	PA2055
1960	1	NA	3386039	3386926	-	PA14_37940	NA		DNA-binding transcriptional regulator	PA2054
1961	1	NA	3387041	3387703	+	PA14_37950	NA		carbonate dehydratase	PA2053
1962	1	3387709	3387743	3388213	+	PA14_37965	34		cyanate hydratase	PA2052
1963	2	NA	3388251	3389707	-	PA14_37980, PA14_37990	NA		putative Fe2+-dicitrate sensor,, RNA polymerase sigma	PA2051, PA2050
1964	2	3390004	3390035	3392031	+	PA14_38000, PA14_38010	31		NA, hypothetical protein	NA, PA2049
1965	1	NA	3392089	3392496	-	PA14_38020	NA		putative ntibiotic biosynthesis	PA2048
1966	1	NA	3392910	3393899	+	PA14_38040	NA		AraC family transcriptional	PA2047
1967	1	NA	3394935	3395342	+	PA14_38050	NA		hypothetical protein	PA2046
1968	2	3395371	3395401	3397710	+	PA14_38060, PA14_38080	30		hypothetical protein, hypothetical protein	PA2045, PA2044
1969	1	NA	3397868	3398770	-	PA14_38090	NA		putative pseudouridylate synthase	PA2043
1970	1	3400317	3398891	3400120	-	PA14_38110	197		serine/threonine transporter SstT	PA2042
1971	1	NA	3400608	3401978	-	PA14_38130	NA		putative amino acid	PA2041
1972	1	NA	3402135	3403511	-	PA14_38140	NA		putative glutamine synthetase	PA2040
1973	2	NA	3404017	3405074	+	PA14_38160, PA14_38170	NA		hypothetical protein, hypothetical protein	PA2039, PA2038
1974	1	NA	3405199	3406659	-	PA14_38180	NA		hypothetical protein	PA2037
1975	1	NA	3406799	3407320	-	PA14_38190	NA		hypothetical protein	PA2036
1976	1	3407813	3408055	3409713	+	PA14_38200	242		thiamine pyrophosphate protein	PA2035
1977	2	3411355	3409721	3411303	-	PA14_38210, PA14_38220	52		hypothetical protein, hypothetical protein	PA2034, PA2033
1978	1	NA	3411438	3412862	-	PA14_38250	NA		putative transcriptional regulator	PA2032
1979	2	NA	3413042	3413550	+	PA14_38260, PA14_38270	NA		hypothetical protein, hypothetical protein	PA2031, PA2030
1980	2	3414448	3413625	3414421	-	PA14_38290, PA14_38300	27		hypothetical protein, putative transcriptional regulator	PA2029, PA2028
1981	1	NA	3414554	3414946	+	PA14_38310	NA		hypothetical protein	PA2027
1982	1	NA	3415099	3416100	+	PA14_38320	NA		bile acid/Na+ symporter	PA2026
1983	1	3417531	3416155	3417510	-	PA14_38330	21		glutathione reductase	PA2025
1984	1	3417642	3417655	3418077	+	PA14_38340	13		putative ring-cleaving dioxygenase	PA2024
1985	1	3419131	3418259	3419098	-	PA14_38350	33		UTP-glucose-1-phosphate uridylyltransferase	PA2023
1986	1	NA	3419146	3420507	-	PA14_38360	NA		putative nucleotide sugar	PA2022
1987	1	3420633	3420659	3420883	+	PA14_38370	26		hypothetical protein	PA2021
1988	1	3421557	3420889	3421521	-	PA14_38380	36		putative transcriptional regulator	PA2020
1989	2	NA	3421686	3426029	+	PA14_38395, PA14_38410	NA		periplasmic multidrug efflux, multidrug efflux protein	PA2019, PA2018
1990	1	3427258	3426271	3427200	-	PA14_38420	58		hypothetical protein	PA2017
1991	1	3427367	3427393	3427797	+	PA14_38430	26		regulatory gene of	PA2016
1992	5	3427822	3427846	3434437	+	PA14_38440, PA14_38460, PA14_38470, PA14_38480, PA14_38490	24		citronelloyl-CoA dehydrogenase, GnyD, acyl-CoA carboxyltransferase beta, gamma-carboxygeranoyl-CoA hydratase, alpha subunit of, hydroxymethylglutaryl-CoA lyase	PA2015, PA2014, PA2013, PA2012, PA2011
1993	1	3435358	3434505	3435308	-	PA14_38500	50		IclR family transcriptional	PA2010
1994	1	3435381	3435469	3436767	+	PA14_38510	88		homogentisate 1,2-dioxygenase	PA2009
1995	2	3436709	3436772	3438705	+	PA14_38530, PA14_38550	63		fumarylacetoacetase, maleylacetoacetate isomerase	PA2008, PA2007
1996	1	NA	3438790	3440142	+	PA14_38560	NA		putative MFS transporter	PA2006
1997	1	NA	3440271	3441641	+	PA14_38570	NA		putative transcriptional regulator	PA2005
1998	2	NA	3441918	3444113	+	PA14_38580, PA14_38590	NA		hypothetical protein, 3-hydroxybutyrate dehydrogenase	PA2004, PA2003
1999	1	NA	3444304	3445728	-	PA14_38610	NA		hypothetical protein	PA2002
[truncated: 1,795 more rows]
