# Supplementary material for: The Single-Nucleotide Resolution Transcriptome of Pseudomonas aeruginosa Grown in Body Temperature
Source: PLoS Pathog. 2012 Sep 27;8(9):e1002945. doi: 10.1371/journal.ppat.1002945 (PMC3460626; doi:10.1371/journal.ppat.1002945)
Supplement: Table S4 — LasR binding sites. (XLSX) [file ppat.1002945.s008.xlsx]

## Sheet: Sheet1
	Gene details						LasR binding site					Validation
First described	PA14	PAO1	ORF from	ORF to	Strand	Product	TSS	Start relative to TSS (nt)	End relative to TSS (nt)	Sequence of binding site	Comment	Validated?	Validation method	Validated performed in
Here	PA14_03490	PA0269	319880	320317	+	hypothetical protein	319822	-53	-38	CTGGTATTTCTGGTAA		Yes	LacZ + EMSA (validated only by EMSA)	Here
Here	PA14_07430	PA0572	634969	637740	-	hypothetical protein	637867	-51	-36	CAACCAGAACAGATAG		Yes	LacZ + EMSA	Here
Here	PA14_09480	PA4210	812647	813135	-	phenazine biosynthesis protein	813471	-52	-37	CTACCAGATCTTGTAG		Yes	LacZ + EMSA	Here
Here	PA14_09490	PA4209	813831	814835	+	putative phenazine-specific methyltransferase	813562	-54	-39	CTACAAGATCTGGTAG		Yes	LacZ + EMSA	Here
Here	PA14_16660	PA3690	1424253	1426481	-	putative metal-transporting P-type ATPase	1426506	-60	-45	CTACCCGAATTGGCAG		No	LacZ + EMSA (not validated by either methods)	Here
Here	PA14_18800	PA3520	1620687	1620881	+	hypothetical protein	1620663	-53	-38	CTGAGAGATTTATGAG		Yes	LacZ + EMSA (validated only by EMSA)	Here
Here	PA14_23220	PA3171	2011148	2011846	-	3-demethylubiquinone-9 3-methyltransferase	2011870	-59	-44	CTGCCAAAGCTGGCAA		Yes	LacZ + EMSA (validated only by EMSA)	Here
Here	PA14_33830	PA2384	3007457	3007780	+	hypothetical protein	3007347	-60	-45	CTATCAGATCTGATGG		Yes	LacZ + EMSA	Here
Here	PA14_33890	PA2379	3011096	3011566	+	putative oxidoreductase	3011008	-52	-37	CGTTCAGTTCTGCCAG		Yes	LacZ + EMSA (validated only by EMSA)	Here
Here	PA14_34870	PA2300	3103993	3105444	+	chitinase	3103855	-51	-36	CTGCCAATTGTGGTAG		Yes	LacZ + EMSA	Here
Here	PA14_37745	PA2069	3364838	3366562	+	carbamoyl transferase	3364801	-52	-37	CGACCAGATCTGGCAG		Yes	LacZ + EMSA	Here
Here	PA14_40310	PA1869	3601464	3601703	-	putative acyl carrier protein	3601739	-51	-36	CTGCCAGATCTGGCAG		Yes	LacZ + EMSA	Here
Here	PA14_41500	PA1784	3701850	3702545	+	putative lyase	3701762	-49	-34	CTATCCGTTCTGGGAG		Yes	LacZ + EMSA	Here
Here	lrs2 sRNA	-	3831525	3831670	+	small RNA	3831525	-51	-36	CTACCAAAACAGGTAG		Yes	LacZ + EMSA	Here
Here	PA14_48530	PA1221	4314228	4316084	+	putative AMP-binding enzyme	4313912	-52	-37	CTACCAATTCTCATAG		Yes	LacZ + EMSA	Here
Here	lrs1 sRNA	-	4571560	4571808	-	small RNA	4571560	-51	-36	CTGTGAGATCTGGGAG		Yes	LacZ + EMSA	Here
Here	PA14_53250	PA0852	4719782	4720951	+	chitin-binding protein CbpD precursor	4719743	-52	-37	CCGTCACATTTGGTAG		Yes	LacZ + EMSA	Here
Gilbert et al	PA14_01490	PA0122	139831	140241	+	putative hemolysin	139720	-52	-37	CTACCAGATCTGGCAG			NA	NA
Gilbert et al	PA14_01760	PA0143	161387	162376	+	nonspecific ribonucleoside hydrolase	161303	-51	-36	CTGTCGGTTCGCATAG			NA	NA
Schuster et al	PA14_13390	PA3904	1151320	1151715	-	hypothetical protein	1151738	-52	-37	TGAGCAGTTCAGATAG		Yes	EMSA	Gilbert et al
Schuster et al	PA14_16250	PA3724	1387521	1389017	+	elastase LasB	1387380	-50	-35	CTGCCAGTTCTGGCAG	site 1 of 2	Yes	EMSA	Gilbert et al
Schuster et al	PA14_16250	PA3724	1387521	1389017	+	elastase LasB	1387380	-111	-96	CCTGCTTTTCTGCTAG	site 2 of 2	Yes	EMSA	Gilbert et al
Pearson et al	PA14_19100	PA3479	1648632	1649519	+	rhamnosyltransferase chain A	1648405	-51	-36	CTGTGAAATCTGGCAG		No	EMSA	Gilbert et al
Gilbert et al	PA14_21030	PA3326	1817157	1817762	+	ATP-dependent Clp protease proteolytic subunit	1816944	-26	-11	CTTACAAATCTGTTAG	site 1 of 4	Yes	EMSA	Gilbert et al
Gilbert et al	PA14_21030	PA3326	1817157	1817762	+	ATP-dependent Clp protease proteolytic subunit	1816944	-57	-42	CTGTTAATTCTGGTAG	site 2 of 4	Yes	EMSA	Gilbert et al
Gilbert et al	PA14_21030	PA3326	1817157	1817762	+	ATP-dependent Clp protease proteolytic subunit	1816944	-90	-75	CTGTTAATTCTTGCAG	site 3 of 4	Yes	EMSA	Gilbert et al
Gilbert et al	PA14_21030	PA3326	1817157	1817762	+	ATP-dependent Clp protease proteolytic subunit	1816944	-120	-105	CTATTACTTTTGGCAG	site 4 of 4	Yes	EMSA	Gilbert et al
Chapon-Herve et al	PA14_23980	PA3104	2083941	2084648	-	secretion protein XcpP	2084637	-51	-36	CTATTGATAGAAGTAG		Yes	H-H system	Chapon-Herve et al
Li et al	PA14_30580	PA2591	2647547	2648353	+	LuxR family transcriptional regulator	2647496	-61	-46	CTACCAGAACTGGTAG		Yes	EMSA	Gilbert et al
Gilbert et al	PA14_30630	PA2587	2654014	2655162	+	putative FAD-dependent monooxygenase	2653940	-49	-34	CTCGATCTTCTGATAG		Yes	EMSA	Gilbert et al
Gilbert et al	PA14_34810	PA2305	3090885	3094634	+	putative non-ribosomal peptide synthetase	3090855	-53	-38	CTATCAGTTGTATTAG		Yes	EMSA	Gilbert et al
Gilbert et al	PA14_43050	PA1656	3829632	3831188	-	hypothetical protein	3831434	-55	-40	CTACCTGTTTTGGTAG			NA	NA
Schuster et al	PA14_45940	PA1432	4084370	4084975	-	autoinducer synthesis protein LasI	4084996	-52	-37	CTATCTCATTTGCTAG		Yes	EMSA	Gilbert et al
Schuster et al	PA14_45950	PA1431	4085107	4085349	+	regulatory protein RsaL	4085084	-51	-36	CTAGCAAATGAGATAG		Yes	EMSA	Gilbert et al
Gilbert et al	PA14_48140	PA1245	4283935	4285179	-	hypothetical protein	4285444	-73	-58	CTGGCAGAACTGACAG		Yes	EMSA	Gilbert et al
Gilbert et al	PA14_51430	PA0996	4569916	4571469	-	coenzyme A ligase	4571808	-51	-36	CTGTGAGATCTGGGAG	promoter of lrs1	No	EMSA	Gilbert et al
Schuster et al	PA14_61870	PA4677	5518127	5519365	-	hypothetical protein	5519480	-53	-38	CTATCACTTGGAGTAG		Yes	EMSA	Gilbert et al
Gilbert et al	PA14_10700	PA4117	921046	923232	-	putative bacteriophytochrome	ND	ND	ND	ND	TSS not identified	No	EMSA	Gilbert et al
Gilbert et al	PA14_20290	PA3385	1747602	1747928	-	DNA binding-protein	ND	ND	ND	ND	TSS not identified		NA	NA
Gilbert et al	PA14_20300	PA3384	1748289	1749125	+	ATP-binding component of ABC phosphonate	ND	ND	ND	ND	TSS not identified		NA	NA
Gilbert et al	PA14_24360	PA3535	2117776	2120700	+	hypothetical protein	ND	ND	ND	ND	TSS not identified		NA	NA
Gilbert et al	PA14_28370	PA2763	2451388	2451597	+	hypothetical protein	ND	ND	ND	ND	TSS not identified	No	EMSA	Gilbert et al
Gilbert et al	PA14_31340	PA2763	2725301	2725657	+	hypothetical protein	ND	ND	ND	ND	TSS not identified	No	EMSA	Gilbert et al
Gilbert et al	PA14_33260	PA2426	2910054	2910617	-	extracytoplasmic-function sigma-70 factor	ND	ND	ND	ND	TSS not identified		NA	NA
Gilbert et al	PA14_39780	PA1914	3544298	3545524	+	hypothetical protein	ND	ND	ND	ND	TSS not identified	Yes	EMSA	Gilbert et al
Gilbert et al	PA14_53830	PA0806	4773215	4773610	-	hypothetical protein	ND	ND	ND	ND	TSS not identified		NA	NA
Gilbert et al	PA14_53840	PA0805	4774171	4774398	+	hypothetical protein	ND	ND	ND	ND	TSS not identified		NA	NA
Gilbert et al	PA14_59060	PA3385	5260143	5260397	+	hypothetical protein	ND	ND	ND	ND	TSS not identified		NA	NA
Gilbert et al	PA14_68480	PA5184	6109123	6109680	-	chorismate mutase	ND	ND	ND	ND	TSS not identified	No	EMSA	Gilbert et al
Gilbert et al	PA14_00300	PA0026	27667	28653	+	phospholipase C, PlcB	27643	ND	ND	ND	No match to consensus motif	No	EMSA	Gilbert et al
Gilbert et al	PA14_01780	PA0144	163296	163922	-	putative nucleoside 2-deoxyribosyltransferase	163972	ND	ND	ND	No match to consensus motif		NA	NA
Gilbert et al	PA14_18630	PA3535	1600241	1603228	-	putative serine protease	1603275	ND	ND	ND	No match to consensus motif		NA	NA
Pesci et al	PA14_19120	PA3477	1650990	1651715	+	transcriptional regulator RhlR	1650961	ND	ND	ND	No match to consensus motif	Yes	EMSA	Gilbert et al
Gilbert et al	PA14_26020	PA2939	2273468	2275078	-	putative aminopeptidase	2275163	ND	ND	ND	No match to consensus motif		NA	NA
Li et al	PA14_30570	PA2592	2646291	2647394	-	putative periplasmic	2647477	ND	ND	ND	No match to consensus motif	Yes	EMSA	Gilbert et al
Gilbert et al	PA14_30620	PA2588	2652368	2653396	-	AraC family transcriptional regulator	2653469	ND	ND	ND	No match to consensus motif	Yes	EMSA	Gilbert et al
Gilbert et al	PA14_37590	PA2081	3345406	3346047	+	kynurenine formamidase, KynB	3345386	ND	ND	ND	No match to consensus motif		NA	NA
Gilbert et al	PA14_49410	PA1159	4391031	4391240	-	cold-shock protein	4391392	ND	ND	ND	No match to consensus motif	Yes	EMSA	Gilbert et al
Xiao et al	PA14_51340	PA1003	4562837	4563835	+	transcriptional regulator MvfR	4562558	ND	ND	ND	No match to consensus motif	Yes	lacZ fusion, mutagenesis	Xiao et al
Gilbert et al	PA14_53210	PA0855	4716344	4717363	+	hypothetical protein	4716321	ND	ND	ND	No match to consensus motif		NA	NA
Gilbert et al	PA14_55940	PA4306	4994409	4994621	+	hypothetical protein	4994360	ND	ND	ND	No match to consensus motif	No	EMSA	Gilbert et al
Gilbert et al	PA14_63170	PA4778	5638181	5638579	+	putative transcriptional regulator	5638157	ND	ND	ND	No match to consensus motif	Yes	EMSA	Gilbert et al
Gilbert et al	PA14_69090	PA5232	6162042	6163115	-	hypothetical protein	6163253	ND	ND	ND	No match to consensus motif		NA	NA
