# Supplementary material for: The Single-Nucleotide Resolution Transcriptome of Pseudomonas aeruginosa Grown in Body Temperature
Source: PLoS Pathog. 2012 Sep 27;8(9):e1002945. doi: 10.1371/journal.ppat.1002945 (PMC3460626; doi:10.1371/journal.ppat.1002945)
Supplement: Table S5 — Unannotated open reading frames in P. aeruginosa PA14 found in this study. (XLSX) [file ppat.1002945.s009.xlsx]

## Sheet: Sheet1
TSS	From	To	Strand	ORF length (nt)	New locus tag	Homolog	Annotation
291320	290802	291137	-	336	PA14_NovelOrf_001	ACD39014.1	hypothetical protein
309483	308842	309462	-	621	PA14_NovelOrf_002	ACD39101.1	XRE family transcriptional regulator
312525	312549	312912	+	364	PA14_NovelOrf_003	YP_869993.1	hypothetical protein, transcriptional regulator, XRE family, xenobiotic response element family
686787	686793	687116	+	324	PA14_NovelOrf_023	BAA83147	hypothetical protein
935294	934960	935266	-	307	PA14_NovelOrf_004	YP_002438471.1	hypothetical protein
1195634	1195661	1196203	+	543	PA14_NovelOrf_005	NP_252555.1	pyocin protein
1303727	1303815	1304061	+	247	PA14_NovelOrf_006	YP_001346690.1	hypothetical protein
1311707	1311410	1311523	-	114	PA14_NovelOrf_007	YP_002527564.1	hypothetical protein
1767110	1767110	1767400	+	291	PA14_NovelOrf_008	YP_003006783.1	Rhs family protein, VgrG, type VI secretion system Vgr family protein
2362540	2362150	2362468	-	319	PA14_NovelOrf_009	ZP_04588904.1	hypothetical protein, outer membrane lipoprotein OprI, Annotated as P14 sRNA in P. aeruginosa
2451226	2450961	2451159	-	199	PA14_NovelOrf_010	ZP_01366221.1	hypothetical protein, putative lipoprotein
2515994	2515840	2515967	-	128	PA14_NovelOrf_011	YP_001349344.1	hypothetical protein
2725236	2725090	2725225	-	136	PA14_NovelOrf_012	ZP_01365935	hypothetical protein
2864212	2865057	2865150	+	94	PA14_NovelOrf_013	YP_003871798	hypothetical protein
2866734	2866985	2867121	+	137	PA14_NovelOrf_014	NP_927586	hypothetical protein
2869305	2869962	2870170	+	209	PA14_NovelOrf_015	ZP_05125462	hypothetical protein, distant homology to ssDNA exonuclease
3490123	3489880	3490099	-	220	PA14_NovelOrf_016	YP_002440949	hypothetical protein, cold-shock DNA-binding domain-containing protein
3662557	3662585	3662760	+	176	PA14_NovelOrf_017	NP_250504	probable hydroxyacylglutathione hydrolase
3975230	3974940	3975182	-	243	PA14_NovelOrf_018	YP_001350879	Sel1
4892648	4892675	4892968	+	294	PA14_NovelOrf_019	YP_004683020.1	hypothetical protein
4755041	4755165	4755580	+	416	PA14_NovelOrf_020	ZP_04666296	conserved hypothetical protein
4778410	4778449	4778600	+	152	PA14_NovelOrf_021	ZP_01364179	hypothetical protein
5370054	5370069	5370250	+	182	PA14_NovelOrf_022	ZP_04932026	Tfp pilus assembly protein FimT
