# Supplementary material for: The Single-Nucleotide Resolution Transcriptome of Pseudomonas aeruginosa Grown in Body Temperature
Source: PLoS Pathog. 2012 Sep 27;8(9):e1002945. doi: 10.1371/journal.ppat.1002945 (PMC3460626; doi:10.1371/journal.ppat.1002945)
Supplement: Table S6 — Intergenic non-coding RNAs. (XLSX) [file ppat.1002945.s010.xlsx]

## Sheet: Sheet1
Gene					Normalized expression (RPKM)		Gene chatacteristics			Comment	Described in
Id	From	To	Strand	Length	Sample 28°C	Sample 37°C	Has terminator? (Y/N)	Conservation	Putative ORF in sequence
PA14sr_001	79	221	+	143	54.3582	32.7645	N	P. aeruginosa specific	N		Here
PA14sr_001	40890	40946	-	57	49.59	45.6659	N	P. aeruginosa specific	N		Here
PA14sr_002	54005	54381	+	377	89.9722	57.9969	N	P. aeruginosa specific	Y		Here
PA14sr_003	63180	63396	-	217	234.467	35.9855	N	P. aeruginosa specific	N		Here
PA14sr_004	63961	64159	-	199	926.821	253.755	N	Pseudomonas specific	N		Here
PA14sr_005	159630	159725	-	96	44.1661	75.9195	N	P. aeruginosa specific	N		Here
PA14sr_006	181430	181552	-	123	499.83	1159.69	N	P. aeruginosa specific	N		Here
PA14sr_007	182870	182995	-	126	33.6503	61.9751	N	P. aeruginosa specific	N		Here
PA14sr_008	187590	187790	-	201	31.6414	31.0801	Y	P. aeruginosa specific	Y		Here
PA14sr_009	220346	220520	+	175	56.5325	92.219	N	P. aeruginosa specific	N		Here
PA14sr_010	277945	278130	+	186	155.768	120.352	N	P. aeruginosa specific	N		Here
PA14sr_011	278251	278398	+	148	539.542	601.494	N	P. aeruginosa specific	N		Here
PA14sr_012	341120	341309	+	190	111.577	57.539	N	P. aeruginosa specific	Y		Here
P1	348674	348845	-	172	225.966	166.468	Y	Pseudomonas specific	N		Livny et al
P2	370626	370763	+	138	220.19	173.53	N	P. aeruginosa specific	N	TSS not detected. Likely 3' UTR	Livny et al
PA14sr_013	384606	384720	+	115	43.0139	40.7419	N	P. aeruginosa specific	N		Here
PA14sr_014	412109	412320	+	212	76.6656	61.3904	N	P. aeruginosa specific	N		Here
PA14sr_015	425810	426072	-	263	322.429	306.812	Y	Widespread	Y		Here
RsmY	596840	596963	+	124	45049.4	31806.4	Y	Pseudomonas specific	N		Valverde et al
PA14sr_016	640280	640360	+	81	52.345	57.8434	Y	Pseudomonas specific	N		Here
PA14sr_017	642267	643339	-	1073	187.695	320.214	N	Widespread	Y		Here
PA14sr_018	711361	711603	-	243	491.461	141.395	N	PA14 specific	Y		Here
PA14sr_019	711471	712100	+	630	265.838	95.8548	N	PA14 specific	Y		Here
P27	744842	745034	-	193	2969.42	2214.53	Y	Pseudomonas specific	N	TSS not detected.	Livny et al
P26	745955	746052	+	98	4773.54	4478.14	Y	Widespread	N		Livny et al
PA14sr_020	812942	813471	-	530	182.664	457.727	N	P. aeruginosa specific	Y		Here
PA14sr_021	839003	839080	+	78	18.1194	26.697	N	P. aeruginosa specific	N		Here
PA14sr_022	849661	849973	-	313	564.422	161.333	Y	P. aeruginosa specific	N		Here
PA14sr_023	866313	866340	+	28	100.951	111.555	N	PA14 specific	N		Here
PA14sr_024	869680	869715	-	36	98.1468	101.226	N	P. aeruginosa specific	N		Here
PA14sr_025	879180	879277	-	98	14.4216	26.5608	N	P. aeruginosa specific	N		Here
PA14sr_026	898509	898600	+	92	30.7242	16.9758	N	P. aeruginosa specific	N		Here
PA14sr_027	1002180	1002407	-	228	49.59	22.8329	N	P. aeruginosa specific	N		Here
PA14sr_028	1007130	1007701	+	572	51.8874	52.7872	N	Pseudomonas specific	Y		Here
PA14sr_029	1011564	1011620	+	57	24.795	18.2663	N	P. aeruginosa specific	N		Here
PA14sr_030	1011621	1011812	-	192	529.993	1325.88	N	P. aeruginosa specific	Y		Here
PA14sr_031	1031144	1031160	+	17	41.568	30.623	Y	P. aeruginosa specific	N		Here
P24	1080052	1080308	+	257	13.7482	10.1282	Y	P. aeruginosa specific	N	TSS not detected.	Livny et al
PA14sr_032	1113277	1114170	+	894	246.618	139.756	N	Widespread	Y		Here
PA14sr_033	1117680	1117782	-	103	205.822	171.846	N	P. aeruginosa specific	N		Here
PA14sr_034	1151863	1152090	+	228	71.2856	63.9322	N	P. aeruginosa specific	Y		Here
PA14sr_035	1198080	1199053	-	974	116.083	67.3454	N	Widespread	Y		Here
PA14sr_036	1229760	1229910	+	151	37.4388	20.6857	N	P. aeruginosa specific	N		Here
PA14sr_037	1230816	1231001	+	186	49.39	27.9888	N	P. aeruginosa specific	N		Here
PA14sr_038	1243770	1243921	-	152	37.1925	27.3995	N	P. aeruginosa specific	N		Here
PA14sr_039	1259361	1259572	-	212	326.662	235.739	N	P. aeruginosa specific	N		Here
PtaRNA1	1315990	1316061	-	72	206.108	332.6	Y	Widespread	N	TSS not detected.	Findeiss et al
PA14sr_040	1320081	1320307	-	227	199.234	261.442	N	P. aeruginosa specific	N		Here
PA14sr_041	1368305	1368397	-	93	106.378	89.564	N	P. aeruginosa specific	N		Here
t44	1462994	1463091	+	98	8588.04	6518.01	N	Widespread	N	TSS not detected.	Tjaden et al
PrrB/RsmZ	1500284	1500469	+	186	40940.5	39147.9	Y	P. aeruginosa specific	N		Aarons et al
PA14sr_042	1551809	1551893	-	85	41.568	18.3738	N	P. aeruginosa specific	N		Here
PA14sr_043	1599123	1599310	+	188	26.3117	44.3056	N	Pseudomonas specific	N		Here
PA14sr_044	1635358	1635441	+	84	75.7132	18.5925	N	P. aeruginosa specific	N		Here
PA14sr_045	1655997	1656175	+	179	161.86	186.133	N	P. aeruginosa specific	N		Here
PA14sr_046	1760720	1760918	-	199	56.8166	57.5528	Y	P. aeruginosa specific	N		Here
PA14sr_047	1761672	1762060	+	389	94.4631	72.2671	N	P. aeruginosa specific	N		Here
PA14sr_048	1787380	1787441	-	62	364.726	352.658	N	P. aeruginosa specific	N		Here
PA14sr_049	1817850	1817956	-	107	99.064	72.98	N	P. aeruginosa specific	N		Here
P18	1844065	1844199	+	135	47.1105	26.9936	N	P. aeruginosa specific	N	TSS not detected.	Livny et al
PA14sr_050	1852160	1852206	-	47	45.1058	88.6112	N	P. aeruginosa specific	N		Here
PA14sr_051	1862186	1862350	+	165	102.786	25.2408	N	P. aeruginosa specific	N		Here
PA14sr_052	1919782	1920900	+	1119	179.98	99.0937	N	PA14 specific	Y		Here
PA14sr_053	1922860	1923003	-	144	24.5367	25.3065	N	P. aeruginosa specific	N		Here
PA14sr_054	1924215	1924350	+	136	41.568	68.9017	N	P. aeruginosa specific	N		Here
PA14sr_055	1968773	1968815	+	43	115.037	96.8541	N	P. aeruginosa specific	N		Here
PA14sr_056	1998110	1998229	-	120	129.554	82.4269	N	P. aeruginosa specific	N		Here
PA14sr_057	2041166	2041459	+	294	449.472	334.666	N	P. aeruginosa specific	N		Here
PA14sr_058	2128822	2128958	+	137	77.3712	60.7989	N	P. aeruginosa specific	N		Here
PA14sr_059	2171419	2171470	-	52	67.9478	120.136	N	P. aeruginosa specific	N		Here
PA14sr_060	2236725	2236960	-	236	838.406	480.885	N	P. aeruginosa specific	N		Here
P16	2250485	2250742	-	258	265.681	246.171	Y	Pseudomonas specific	N		Livny et al
PA14sr_061	2256650	2256866	-	217	449.395	467.812	N	Pseudomonas specific	N		Here
P15	2270094	2270320	-	227	17.8149	17.4989	Y	Pseudomonas specific	N	5' end was corrected according to TSS mapping data.	Livny et al
PA14sr_062	2451131	2451410	+	280	204.426	117.133	N	P. aeruginosa specific	N		Here
PA14sr_063	2457400	2457621	-	222	378.794	511.211	Y	P. aeruginosa specific	N		Here
PA14sr_064	2461590	2462120	+	531	42.5857	63.7258	N	Pseudomonas specific	Y		Here
PA14sr_065	2465067	2465518	+	452	248.581	234.957	N	P. aeruginosa specific	Y		Here
P13	2466977	2467052	+	76	120.876	75.3487	Y	P. aeruginosa specific	N	Part of a T-box riboswitch.	Livny et al
PA14sr_066	2568020	2568162	-	143	9.88331	29.124	N	P. aeruginosa specific	N		Here
PA14sr_067	2604164	2604521	+	358	680.996	1769.72	N	Pseudomonas specific	N		Here
PA14sr_068	2660551	2661020	+	470	37.5881	42.0903	N	PA14 specific	Y		Here
PA14sr_069	2666556	2666720	+	165	51.3932	56.7917	N	P. aeruginosa specific	N		Here
PA14sr_070	2677582	2678301	+	720	5763.18	2293.49	N	Widespread	N		Here
PA14sr_071	2692009	2693260	+	1252	217.303	281.917	N	Widespread	Y		Here
PA14sr_072	2708053	2708310	+	258	120.515	201.779	N	Widespread	N		Here
PA14sr_073	2714184	2714430	+	247	40.0534	44.2608	Y	Widespread	Y		Here
PA14sr_074	2790140	2790185	-	46	76.8105	0	N	Pseudomonas specific	N		Here
PA14sr_075	2866051	2866340	+	290	58.4819	55.6494	N	P. aeruginosa specific	N		Here
PA14sr_076	2867353	2867490	+	138	35.8449	22.6344	N	P. aeruginosa specific, repetitive	N		Here
PA14sr_077	2867990	2868119	-	130	10.8716	60.0682	N	P. aeruginosa specific	N		Here
PA14sr_078	2924520	2925530	-	1011	157.967	147.784	N	Widespread	Y		Here
PA14sr_079	2942497	2942612	+	116	36.5512	22.4393	N	Pseudomonas specific	N		Here
PA14sr_080	3007300	3007441	-	142	358.305	54.992	N	P. aeruginosa specific	N		Here
PA14sr_081	3190680	3190795	-	116	73.1024	71.8056	N	Pseudomonas specific	N		Here
PA14sr_082	3209499	3209790	+	292	29.0407	37.4398	N	P. aeruginosa specific	Y		Here
PA14sr_083	3281914	3282000	+	87	56.8574	23.9352	N	P. aeruginosa specific	N		Here
PA14sr_084	3344624	3344700	+	77	119.306	67.6092	N	P. aeruginosa specific	N		Here
PA14sr_085	3400460	3400545	-	86	32.8678	66.5872	Y	P. aeruginosa specific	N		Here
P1	3403673	3403783	-	111	19.0988	18.76	N	P. aeruginosa specific	N	TSS not detected.	Livny et al
PA14sr_086	3503371	3503540	+	170	415.68	315.417	N	P. aeruginosa specific	N		Here
PA14sr_087	3543936	3543980	+	45	47.1105	11.5687	N	P. aeruginosa specific	N		Here
PA14sr_088	3562021	3562640	+	620	298.62	283.806	N	P. aeruginosa specific	Y		Here
PA14sr_089	3562910	3563367	-	458	75.603	6.81997	N	P. aeruginosa specific	Y		Here
PA14sr_090	3601260	3601463	-	204	12058.2	7760.38	Y	P. aeruginosa specific	Y		Here
PA14sr_091	3691678	3691783	-	106	573.325	741.597	N	P. aeruginosa specific	N		Here
P11	3705871	3706007	+	137	0	22.7996	Y	Pseudomonas specific	N	TSS not detected.	Livny et al
PA14sr_092	3735920	3736047	-	128	99.3736	81.3423	N	P. aeruginosa specific	N		Here
PA14sr_093	3756122	3756300	+	179	31.5824	49.4416	N	P. aeruginosa specific	N		Here
PA14sr_094	3798392	3798510	+	119	100.951	113.743	N	Pseudomonas specific	N		Here
P10	3827062	3827133	-	72	274.811	115.687	N	P. aeruginosa specific	N		Livny et al
lrs2	3831525	3831670	+	146	121.003	39.2226	N	P. aeruginosa specific	N		Here
PA14sr_095	3840656	3840960	+	305	141.331	131.428	N	P. aeruginosa specific	N		Here
PA14sr_096	3922862	3922900	+	39	163.075	280.318	N	P. aeruginosa specific	N		Here
PA14sr_097	3947100	3947246	-	147	187.48	453.304	N	P. aeruginosa specific	N		Here
small SRP	3974544	3974698	-	155	560.766	329.148	N	Widespread	N	Primary 5' end was corrected according to TSS mapping data.	Ullu et al
large SRP	3975617	3975841	-	225	6749.36	9641.34	Y	Widespread	N	5' end was corrected according to TSS mapping data.	Ullu et al.
small SRP	3975640	3975744	-	105	14254.3	20511.3	Y	Widespread	N	Primary 5' end was corrected according to TSS mapping data.	Ullu et al
PA14sr_098	4133141	4133358	-	218	184.768	66.8649	N	P. aeruginosa specific	N		Here
PA14sr_099	4160480	4160625	-	146	24.2006	35.6569	N	P. aeruginosa specific	N		Here
PA14sr_100	4171831	4171890	+	60	82.4433	164.854	N	P. aeruginosa specific	N		Here
P9	4198015	4198118	-	104	292.175	190.216	Y	Pseudomonas specific	N		Livny et al
PA14sr_101	4207034	4207200	+	167	50.7777	68.5808	N	P. aeruginosa specific	N		Here
C4	4286083	4286168	+	86	11002.5	19195.3	N	P. aeruginosa specific	N	TSS was not detected.	Weinberg et al
PA14sr_102	4355212	4355660	+	449	130.629	119.423	N	PA14 specific, exists in phage Pf1	N		Here
PA14sr_103	4381912	4382080	+	169	25.0884	21.5629	N	P. aeruginosa specific	N		Here
PA14sr_104	4394112	4394140	+	29	97.4699	35.9028	N	P. aeruginosa specific	N		Here
PA14sr_105	4394294	4394580	+	287	201.902	155.996	N	P. aeruginosa specific	N		Here
PA14sr_106	4401250	4401481	-	232	21.3215	26.9271	N	P. aeruginosa specific	Y		Here
PA14sr_107	4401680	4402601	-	922	64.3809	70.579	N	Pseudomonas specific	Y		Here
PA14sr_108	4405592	4405718	+	127	61.2065	28.694	N	Pseudomonas specific	N		Here
PA14sr_109	4508643	4508686	+	44	1638.16	1703.75	N	P. aeruginosa specific	N		Here
P8	4532320	4532397	-	78	45.2985	26.697	Y	P. aeruginosa specific	N		Livny et al
PA14sr_110	4552677	4552900	+	224	173.509	185.925	N	P. aeruginosa specific	N		Here
PA14sr_111	4562355	4562460	+	106	133.331	78.5798	N	P. aeruginosa specific	N		Here
lrs1	4571560	4571808	-	249	255.418	183.984	N	P. aeruginosa specific	Y		Here
PA14sr_112	4605904	4606040	+	137	41.2646	41.7993	N	P. aeruginosa specific	N		Here
PA14sr_113	4608090	4608135	-	46	46.0863	67.9032	Y	P. aeruginosa specific	N		Here
PA14sr_114	4655649	4655819	-	171	37.1925	9.13317	N	Pseudomonas specific	N		Here
P6	4679437	4679946	+	510	356.1	232.735	Y	Pseudomonas specific	Y	TSS not detected.	Livny et al
P7	4679619	4679812	-	194	94.7066	53.6692	N	P. aeruginosa specific	N		Livny et al
PA14sr_115	4700760	4700822	-	63	56.0839	24.79	N	P. aeruginosa specific	N		Here
PA14sr_116	4738490	4738580	+	91	807.608	291.76	N	P. aeruginosa specific	N		Here
tmRNA	4749731	4750083	+	353	272097	287704	Y	Widespread	N		Ray et al
PA14sr_117	4750040	4750526	-	487	15925.2	18843.9	Y	Widespread	Y		Here
PA14sr_118	4772700	4773056	-	357	146.478	115.201	Y	P. aeruginosa specific	Y		Here
PA14sr_119	4773793	4773960	+	168	155.633	58.8764	N	P. aeruginosa specific	N		Here
PA14sr_120	4774020	4774142	-	123	683.676	660.262	N	P. aeruginosa specific	N		Here
PA14sr_121	4826660	4826750	+	91	729.953	680.773	N	P. aeruginosa specific	N		Here
PA14sr_122	4858822	4858900	+	79	116.285	32.9488	N	P. aeruginosa specific	N		Here
P4	4931811	4932025	+	215	23.0074	41.163	N	P. aeruginosa specific	N	TSS not detected.	Livny et al
P3	4951686	4951800	-	115	18.4345	4.52688	Y	P. aeruginosa specific	N		Livny et al
PA14sr_123	4983309	4983380	+	72	39.2587	65.0739	N	P. aeruginosa specific	N		Here
PA14sr_124	4998353	4998600	+	248	293.491	258.196	Y	P. aeruginosa specific	Y		Here
rnpB	5119902	5120253	-	352	189017	201340	N	Widespread	N		Evans et al
PA14sr_125	5132048	5132140	+	93	91.1815	123.151	N	P. aeruginosa specific	N		Here
P35	5149374	5149435	-	62	353.328	293.882	Y	P. aeruginosa specific	N		Livny et al
PA14sr_126	5225100	5225252	-	153	175.51	88.4664	N	Pseudomonas specific	N		Here
PA14sr_127	5274580	5275193	-	614	43.7345	46.6327	N	Pseudomonas specific	N		Here
PA14sr_128	5288159	5288380	+	222	2762.96	3198.59	Y	Pseudomonas specific	N		Here
PA14sr_129	5289620	5289765	-	146	62.9215	85.5766	N	P. aeruginosa specific	N		Here
PA14sr_130	5289980	5290078	-	99	478.243	483.781	Y	P. aeruginosa specific	N		Here
PA14sr_131	5290034	5290160	+	127	1012.69	1123.16	N	Pseudomonas specific	N		Here
PA14sr_132	5307007	5307160	+	154	18.3547	40.5655	Y	Widespread	N		Here
PA14sr_133	5346400	5346497	-	98	86.5294	127.492	N	P. aeruginosa specific	N		Here
PA14sr_134	5355370	5355695	-	326	667.639	491.847	N	Pseudomonas specific	Y		Here
PA14sr_135	5358687	5358930	+	244	69.5072	106.678	N	P. aeruginosa specific	N		Here
PA14sr_136	5370280	5370451	-	172	32.8678	48.4271	N	P. aeruginosa specific	N		Here
PA14sr_137	5412953	5413090	+	138	240.673	120.717	N	P. aeruginosa specific	N		Here
PA14sr_138	5444450	5444661	-	212	223.33	71.2129	N	P. aeruginosa specific	N		Here
PA14sr_139	5479845	5480040	+	196	126.189	130.148	N	P. aeruginosa specific	N		Here
PA14sr_140	5480102	5480320	+	219	106.483	159.268	N	P. aeruginosa specific	N		Here
PrrF1	5555927	5556043	+	117	452.985	146.833	Y	Pseudomonas specific	N		Wilderman et al
PrrF2	5556138	5556252	+	115	1394.88	846.526	Y	Pseudomonas specific	N		Wilderman et al
P36	5580365	5580425	+	61	104.261	76.8085	Y	P. aeruginosa specific	N	TSS not detected.	Livny et al
crcZ	5580520	5580860	+	341	30425.6	35638.3	N	Pseudomonas specific	N		Sonnleitner et al
PA14sr_141	5580968	5581060	+	93	296.34	263.094	N	P. aeruginosa specific	N		Here
P31	5616886	5616910	+	25	113.065	124.942	Y	PA14 specific	N	5' end was corrected according to TSS mapping data.	Livny et al
PA14sr_142	5624080	5624221	-	142	627.034	447.268	N	Pseudomonas specific	N		Here
PA14sr_143	5745153	5745228	-	76	27.8943	27.3995	N	P. aeruginosa specific	N		Here
PA14sr_144	5831261	5831332	+	72	147.22	50.613	Y	P. aeruginosa specific	N		Here
PA14sr_145	5834799	5835020	+	222	124.142	89.1102	N	P. aeruginosa specific	N		Here
PA14sr_146	5943549	5943627	+	79	125.23	92.2566	N	P. aeruginosa specific	N		Here
P37	5943683	5943765	-	83	255.418	319.881	Y	P. aeruginosa specific	N	5' end was corrected according to TSS mapping data.	Livny et al
PA14sr_147	5952181	5952557	-	377	211.81	220.94	N	Widespread	Y		Here
PA14sr_148	6050107	6050235	-	129	290.332	145.281	N	P. aeruginosa specific	N		Here
PA14sr_149	6092690	6093021	-	332	138.351	29.7929	Y	P. aeruginosa specific	N		Here
P34	6107444	6107696	+	253	30.7242	32.9227	N	P. aeruginosa specific	N		Livny et al
PA14sr_150	6135897	6135946	+	50	325.062	239.472	N	P. aeruginosa specific	N		Here
6S	6156533	6156711	+	179	190912	180328	N	Widespread	N		Brownlee et al
PA14sr_151	6157150	6157677	-	528	405.525	265.225	N	Pseudomonas specific	Y		Here
PA14sr_152	6173020	6173097	-	78	63.4179	100.114	N	P. aeruginosa specific	N		Here
PA14sr_153	6228347	6228380	-	34	62.3521	199.049	N	P. aeruginosa specific	N		Here
PA14sr_154	6259647	6259691	-	45	1256.28	1006.48	N	P. aeruginosa specific	N		Here
PA14sr_155	6348194	6348234	-	41	51.7066	12.6973	N	P. aeruginosa specific	N		Here
PA14sr_156	6408280	6408541	-	262	124.07	105.31	N	P. aeruginosa specific	Y		Here
PA14sr_157	6433627	6433910	-	284	27.3705	36.6613	N	P. aeruginosa specific	N		Here
Pseudomon-1	6456433	6456570	-	138	3809.8	6254.64	Y	Pseudomonas specific	N		Weinberg et al
PA14sr_158	6492970	6493030	+	61	208.522	170.686	Y	P. aeruginosa specific	N		Here
PA14sr_159	6496333	6496395	-	63	11.2168	0	N	P. aeruginosa specific	N		Here
